# Supplementary material for: The Constitutive Proteome of Human Aqueous Humor and Race Specific Alterations
Source: Proteomes. 2020 Nov 18;8(4):34. doi: 10.3390/proteomes8040034 (PMC7709111; doi:10.3390/proteomes8040034)
Supplement: Supplementary file 1 [file proteomes-08-00034-s001.xlsx]

## Sheet: Supplemental Table S1-Complete 
Uniprot ID	Gene Symbol	Description	Group	Detected in Proportion of Samples (%)	Mean PSM value
P02768	ALB	Albumin OS=Homo sapiens OX=9606 GN=ALB PE=1 SV=2 - [ALBU_HUMAN]	High	1	4202.61
P02787	TF	Serotransferrin OS=Homo sapiens OX=9606 GN=TF PE=1 SV=3 - [TRFE_HUMAN]	High	1	765.306
P01024	C3	Complement C3 OS=Homo sapiens OX=9606 GN=C3 PE=1 SV=2 - [CO3_HUMAN]	High	1	254.999
P01009	SERPINA1	Alpha-1-antitrypsin OS=Homo sapiens OX=9606 GN=SERPINA1 PE=1 SV=3 - [A1AT_HUMAN]	High	1	233.24
P02790	HPX	Hemopexin OS=Homo sapiens OX=9606 GN=HPX PE=1 SV=2 - [HEMO_HUMAN]	High	1	176.644
P01859	IGHG2	Immunoglobulin heavy constant gamma 2 OS=Homo sapiens OX=9606 GN=IGHG2 PE=1 SV=2 - [IGHG2_HUMAN]	High	1	168.923
P10745	RBP3	Retinol-binding protein 3 OS=Homo sapiens OX=9606 GN=RBP3 PE=1 SV=2 - [RET3_HUMAN]	High	1	166.254
P00450	CP	Ceruloplasmin OS=Homo sapiens OX=9606 GN=CP PE=1 SV=1 - [CERU_HUMAN]	High	1	165.195
P01834	IGKC	Immunoglobulin kappa constant OS=Homo sapiens OX=9606 GN=IGKC PE=1 SV=2 - [IGKC_HUMAN]	High	1	161.416
P02766	TTR	Transthyretin OS=Homo sapiens OX=9606 GN=TTR PE=1 SV=1 - [TTHY_HUMAN]	High	1	156.301
P41222	PTGDS	Prostaglandin-H2 D-isomerase OS=Homo sapiens OX=9606 GN=PTGDS PE=1 SV=1 - [PTGDS_HUMAN]	High	1	142.249
P36955	SERPINF1	Pigment epithelium-derived factor OS=Homo sapiens OX=9606 GN=SERPINF1 PE=1 SV=4 - [PEDF_HUMAN]	High	1	141.333
P01860	IGHG3	Immunoglobulin heavy constant gamma 3 OS=Homo sapiens OX=9606 GN=IGHG3 PE=1 SV=2 - [IGHG3_HUMAN]	High	1	127.647
P02763	ORM1	Alpha-1-acid glycoprotein 1 OS=Homo sapiens OX=9606 GN=ORM1 PE=1 SV=1 - [A1AG1_HUMAN]	High	1	119.155
P02774	GC	Vitamin D-binding protein OS=Homo sapiens OX=9606 GN=GC PE=1 SV=2 - [VTDB_HUMAN]	High	1	115.894
P0DOX7		Immunoglobulin kappa light chain OS=Homo sapiens OX=9606 PE=1 SV=1 - [IGK_HUMAN]	High	1	108.224
P10909	CLU	Clusterin OS=Homo sapiens OX=9606 GN=CLU PE=1 SV=1 - [CLUS_HUMAN]	High	1	102.333
P02647	APOA1	Apolipoprotein A-I OS=Homo sapiens OX=9606 GN=APOA1 PE=1 SV=1 - [APOA1_HUMAN]	High	1	96.7825
P01034	CST3	Cystatin-C OS=Homo sapiens OX=9606 GN=CST3 PE=1 SV=1 - [CYTC_HUMAN]	High	1	82.733
P02765	AHSG	Alpha-2-HS-glycoprotein OS=Homo sapiens OX=9606 GN=AHSG PE=1 SV=2 - [FETUA_HUMAN]	High	1	73.2739
P01023	A2M	Alpha-2-macroglobulin OS=Homo sapiens OX=9606 GN=A2M PE=1 SV=3 - [A2MG_HUMAN]	High	1	72.7654
P19652	ORM2	Alpha-1-acid glycoprotein 2 OS=Homo sapiens OX=9606 GN=ORM2 PE=1 SV=2 - [A1AG2_HUMAN]	High	1	68.6982
P06396	GSN	Gelsolin OS=Homo sapiens OX=9606 GN=GSN PE=1 SV=1 - [GELS_HUMAN]	High	1	62.6562
P01008	SERPINC1	Antithrombin-III OS=Homo sapiens OX=9606 GN=SERPINC1 PE=1 SV=1 - [ANT3_HUMAN]	High	1	62.6484
P02749	APOH	Beta-2-glycoprotein 1 OS=Homo sapiens OX=9606 GN=APOH PE=1 SV=3 - [APOH_HUMAN]	High	1	59.0894
P04217	A1BG	Alpha-1B-glycoprotein OS=Homo sapiens OX=9606 GN=A1BG PE=1 SV=4 - [A1BG_HUMAN]	High	1	59.038
P22352	GPX3	Glutathione peroxidase 3 OS=Homo sapiens OX=9606 GN=GPX3 PE=1 SV=2 - [GPX3_HUMAN]	High	1	58.2279
Q9UBP4	DKK3	Dickkopf-related protein 3 OS=Homo sapiens OX=9606 GN=DKK3 PE=1 SV=2 - [DKK3_HUMAN]	High	1	56.9083
P01011	SERPINA3	Alpha-1-antichymotrypsin OS=Homo sapiens OX=9606 GN=SERPINA3 PE=1 SV=2 - [AACT_HUMAN]	High	1	53.1542
P01876	IGHA1	Immunoglobulin heavy constant alpha 1 OS=Homo sapiens OX=9606 GN=IGHA1 PE=1 SV=2 - [IGHA1_HUMAN]	High	1	51.8344
Q12805	EFEMP1	EGF-containing fibulin-like extracellular matrix protein 1 OS=Homo sapiens OX=9606 GN=EFEMP1 PE=1 SV=2 - [FBLN3_HUMAN]	High	1	50.7893
P00751	CFB	Complement factor B OS=Homo sapiens OX=9606 GN=CFB PE=1 SV=2 - [CFAB_HUMAN]	High	1	50.3508
Q13822	ENPP2	Ectonucleotide pyrophosphatase/phosphodiesterase family member 2 OS=Homo sapiens OX=9606 GN=ENPP2 PE=1 SV=3 - [ENPP2_HUMAN]	High	1	45.7715
P00747	PLG	Plasminogen OS=Homo sapiens OX=9606 GN=PLG PE=1 SV=2 - [PLMN_HUMAN]	High	1	45.4523
Q9UBM4	OPTC	Opticin OS=Homo sapiens OX=9606 GN=OPTC PE=1 SV=1 - [OPT_HUMAN]	High	1	43.0657
P07339	CTSD	Cathepsin D OS=Homo sapiens OX=9606 GN=CTSD PE=1 SV=1 - [CATD_HUMAN]	High	1	39.1013
P00734	F2	Prothrombin OS=Homo sapiens OX=9606 GN=F2 PE=1 SV=2 - [THRB_HUMAN]	High	1	38.2102
P05155	SERPING1	Plasma protease C1 inhibitor OS=Homo sapiens OX=9606 GN=SERPING1 PE=1 SV=2 - [IC1_HUMAN]	High	1	35.9418
P10451	SPP1	Osteopontin OS=Homo sapiens OX=9606 GN=SPP1 PE=1 SV=1 - [OSTP_HUMAN]	High	1	35.9394
P06727	APOA4	Apolipoprotein A-IV OS=Homo sapiens OX=9606 GN=APOA4 PE=1 SV=4 - [APOA4_HUMAN]	High	1	33.9256
P02649	APOE	Apolipoprotein E OS=Homo sapiens OX=9606 GN=APOE PE=1 SV=1 - [APOE_HUMAN]	High	1	32.4338
P01042	KNG1	Kininogen-1 OS=Homo sapiens OX=9606 GN=KNG1 PE=1 SV=2 - [KNG1_HUMAN]	High	1	30.0987
P04196	HRG	Histidine-rich glycoprotein OS=Homo sapiens OX=9606 GN=HRG PE=1 SV=1 - [HRG_HUMAN]	High	1	29.9024
P25311	AZGP1	Zinc-alpha-2-glycoprotein OS=Homo sapiens OX=9606 GN=AZGP1 PE=1 SV=2 - [ZA2G_HUMAN]	High	1	29.6687
P07998	RNASE1	Ribonuclease pancreatic OS=Homo sapiens OX=9606 GN=RNASE1 PE=1 SV=4 - [RNAS1_HUMAN]	High	1	29.2998
O94985	CLSTN1	Calsyntenin-1 OS=Homo sapiens OX=9606 GN=CLSTN1 PE=1 SV=1 - [CSTN1_HUMAN]	High	1	27.5373
P01019	AGT	Angiotensinogen OS=Homo sapiens OX=9606 GN=AGT PE=1 SV=1 - [ANGT_HUMAN]	High	1	25.9975
P02760	AMBP	Protein AMBP OS=Homo sapiens OX=9606 GN=AMBP PE=1 SV=1 - [AMBP_HUMAN]	High	1	24.2332
P02652	APOA2	Apolipoprotein A-II OS=Homo sapiens OX=9606 GN=APOA2 PE=1 SV=1 - [APOA2_HUMAN]	High	1	20.8332
P36222	CHI3L1	Chitinase-3-like protein 1 OS=Homo sapiens OX=9606 GN=CHI3L1 PE=1 SV=2 - [CH3L1_HUMAN]	High	1	20.0253
P23142	FBLN1	Fibulin-1 OS=Homo sapiens OX=9606 GN=FBLN1 PE=1 SV=4 - [FBLN1_HUMAN]	High	1	19.9133
P02750	LRG1	Leucine-rich alpha-2-glycoprotein OS=Homo sapiens OX=9606 GN=LRG1 PE=1 SV=2 - [A2GL_HUMAN]	High	1	18.8727
P05156	CFI	Complement factor I OS=Homo sapiens OX=9606 GN=CFI PE=1 SV=2 - [CFAI_HUMAN]	High	1	18.8208
P02753	RBP4	Retinol-binding protein 4 OS=Homo sapiens OX=9606 GN=RBP4 PE=1 SV=3 - [RET4_HUMAN]	High	1	17.0942
P04004	VTN	Vitronectin OS=Homo sapiens OX=9606 GN=VTN PE=1 SV=1 - [VTNC_HUMAN]	High	1	16.5801
Q16270	IGFBP7	Insulin-like growth factor-binding protein 7 OS=Homo sapiens OX=9606 GN=IGFBP7 PE=1 SV=1 - [IBP7_HUMAN]	High	1	15.0953
P51884	LUM	Lumican OS=Homo sapiens OX=9606 GN=LUM PE=1 SV=2 - [LUM_HUMAN]	High	1	13.8884
P00746	CFD	Complement factor D OS=Homo sapiens OX=9606 GN=CFD PE=1 SV=5 - [CFAD_HUMAN]	High	1	13.1014
P05090	APOD	Apolipoprotein D OS=Homo sapiens OX=9606 GN=APOD PE=1 SV=1 - [APOD_HUMAN]	High	1	12.657
O43505	B4GAT1	Beta-1,4-glucuronyltransferase 1 OS=Homo sapiens OX=9606 GN=B4GAT1 PE=1 SV=1 - [B4GA1_HUMAN]	High	1	12.0916
P24592	IGFBP6	Insulin-like growth factor-binding protein 6 OS=Homo sapiens OX=9606 GN=IGFBP6 PE=1 SV=1 - [IBP6_HUMAN]	High	1	11.2765
Q96PD5	PGLYRP2	N-acetylmuramoyl-L-alanine amidase OS=Homo sapiens OX=9606 GN=PGLYRP2 PE=1 SV=1 - [PGRP2_HUMAN]	High	1	11.1873
Q14515	SPARCL1	SPARC-like protein 1 OS=Homo sapiens OX=9606 GN=SPARCL1 PE=1 SV=2 - [SPRL1_HUMAN]	High	1	11.013
P61916	NPC2	NPC intracellular cholesterol transporter 2 OS=Homo sapiens OX=9606 GN=NPC2 PE=1 SV=1 - [NPC2_HUMAN]	High	1	9.56637
Q99969	RARRES2	Retinoic acid receptor responder protein 2 OS=Homo sapiens OX=9606 GN=RARRES2 PE=1 SV=1 - [RARR2_HUMAN]	High	1	8.03119
P61769	B2M	Beta-2-microglobulin OS=Homo sapiens OX=9606 GN=B2M PE=1 SV=1 - [B2MG_HUMAN]	High	1	7.76614
Q99714	HSD17B10	3-hydroxyacyl-CoA dehydrogenase type-2 OS=Homo sapiens OX=9606 GN=HSD17B10 PE=1 SV=3 - [HCD2_HUMAN]	High	1	7.60608
Q06481	APLP2	Amyloid-like protein 2 OS=Homo sapiens OX=9606 GN=APLP2 PE=1 SV=2 - [APLP2_HUMAN]	High	0.988636	30.9497
P43652	AFM	Afamin OS=Homo sapiens OX=9606 GN=AFM PE=1 SV=1 - [AFAM_HUMAN]	High	0.988636	17.1755
Q8IZJ3	CPAMD8	C3 and PZP-like alpha-2-macroglobulin domain-containing protein 8 OS=Homo sapiens OX=9606 GN=CPAMD8 PE=1 SV=2 - [CPMD8_HUMAN]	High	0.988636	17.1419
Q14767	LTBP2	Latent-transforming growth factor beta-binding protein 2 OS=Homo sapiens OX=9606 GN=LTBP2 PE=1 SV=3 - [LTBP2_HUMAN]	High	0.988636	15.8184
Q15582	TGFBI	Transforming growth factor-beta-induced protein ig-h3 OS=Homo sapiens OX=9606 GN=TGFBI PE=1 SV=1 - [BGH3_HUMAN]	High	0.988636	14.6781
Q9Y5W5	WIF1	Wnt inhibitory factor 1 OS=Homo sapiens OX=9606 GN=WIF1 PE=1 SV=3 - [WIF1_HUMAN]	High	0.988636	14.3896
Q08629	SPOCK1	Testican-1 OS=Homo sapiens OX=9606 GN=SPOCK1 PE=1 SV=1 - [TICN1_HUMAN]	High	0.988636	8.93408
P07602	PSAP	Prosaposin OS=Homo sapiens OX=9606 GN=PSAP PE=1 SV=2 - [SAP_HUMAN]	High	0.988636	7.47514
Q08380	LGALS3BP	Galectin-3-binding protein OS=Homo sapiens OX=9606 GN=LGALS3BP PE=1 SV=1 - [LG3BP_HUMAN]	High	0.988636	6.67194
P00748	F12	Coagulation factor XII OS=Homo sapiens OX=9606 GN=F12 PE=1 SV=3 - [FA12_HUMAN]	High	0.988636	6.06011
P0DOY2	IGLC2	Immunoglobulin lambda constant 2 OS=Homo sapiens OX=9606 GN=IGLC2 PE=1 SV=1 - [IGLC2_HUMAN]	High	0.977273	75.1277
P16870	CPE	Carboxypeptidase E OS=Homo sapiens OX=9606 GN=CPE PE=1 SV=1 - [CBPE_HUMAN]	High	0.977273	18.1681
Q9HCB6	SPON1	Spondin-1 OS=Homo sapiens OX=9606 GN=SPON1 PE=1 SV=2 - [SPON1_HUMAN]	High	0.977273	10.6338
P06312	IGKV4-1	Immunoglobulin kappa variable 4-1 OS=Homo sapiens OX=9606 GN=IGKV4-1 PE=1 SV=1 - [KV401_HUMAN]	High	0.977273	6.05514
P51888	PRELP	Prolargin OS=Homo sapiens OX=9606 GN=PRELP PE=1 SV=1 - [PRELP_HUMAN]	High	0.977273	5.18518
P0DOX8		Immunoglobulin lambda-1 light chain OS=Homo sapiens OX=9606 PE=1 SV=1 - [IGL1_HUMAN]	High	0.965909	64.0969
P00738	HP	Haptoglobin OS=Homo sapiens OX=9606 GN=HP PE=1 SV=1 - [HPT_HUMAN]	High	0.965909	43.3531
P08603	CFH	Complement factor H OS=Homo sapiens OX=9606 GN=CFH PE=1 SV=4 - [CFAH_HUMAN]	High	0.965909	20.1245
Q8NG11	TSPAN14	Tetraspanin-14 OS=Homo sapiens OX=9606 GN=TSPAN14 PE=1 SV=1 - [TSN14_HUMAN]	High	0.965909	17.0868
Q14624	ITIH4	Inter-alpha-trypsin inhibitor heavy chain H4 OS=Homo sapiens OX=9606 GN=ITIH4 PE=1 SV=4 - [ITIH4_HUMAN]	High	0.965909	14.8909
Q99972	MYOC	Myocilin OS=Homo sapiens OX=9606 GN=MYOC PE=1 SV=2 - [MYOC_HUMAN]	High	0.965909	8.75768
Q9NQ79	CRTAC1	Cartilage acidic protein 1 OS=Homo sapiens OX=9606 GN=CRTAC1 PE=1 SV=2 - [CRAC1_HUMAN]	High	0.965909	8.23993
P01861	IGHG4	Immunoglobulin heavy constant gamma 4 OS=Homo sapiens OX=9606 GN=IGHG4 PE=1 SV=1 - [IGHG4_HUMAN]	High	0.954545	99.9506
P35555	FBN1	Fibrillin-1 OS=Homo sapiens OX=9606 GN=FBN1 PE=1 SV=4 - [FBN1_HUMAN]	High	0.954545	12.2654
Q9BSG5	RTBDN	Retbindin OS=Homo sapiens OX=9606 GN=RTBDN PE=1 SV=2 - [RTBDN_HUMAN]	High	0.954545	6.63765
P05452	CLEC3B	Tetranectin OS=Homo sapiens OX=9606 GN=CLEC3B PE=1 SV=3 - [TETN_HUMAN]	High	0.954545	6.40702
Q92520	FAM3C	Protein FAM3C OS=Homo sapiens OX=9606 GN=FAM3C PE=1 SV=1 - [FAM3C_HUMAN]	High	0.954545	5.66677
Q86UP8	GTF2IRD2	General transcription factor II-I repeat domain-containing protein 2A OS=Homo sapiens OX=9606 GN=GTF2IRD2 PE=1 SV=3 - [GTD2A_HUMAN]	High	0.954545	5.51246
P02748	C9	Complement component C9 OS=Homo sapiens OX=9606 GN=C9 PE=1 SV=2 - [CO9_HUMAN]	High	0.943182	13.9296
O14773	TPP1	Tripeptidyl-peptidase 1 OS=Homo sapiens OX=9606 GN=TPP1 PE=1 SV=2 - [TPP1_HUMAN]	High	0.943182	5.23922
P01033	TIMP1	Metalloproteinase inhibitor 1 OS=Homo sapiens OX=9606 GN=TIMP1 PE=1 SV=1 - [TIMP1_HUMAN]	High	0.943182	3.63817
Q15113	PCOLCE	Procollagen C-endopeptidase enhancer 1 OS=Homo sapiens OX=9606 GN=PCOLCE PE=1 SV=2 - [PCOC1_HUMAN]	High	0.943182	3.4528
P01700	IGLV1-47	Immunoglobulin lambda variable 1-47 OS=Homo sapiens OX=9606 GN=IGLV1-47 PE=1 SV=2 - [LV147_HUMAN]	High	0.931818	4.61163
P0C0L5	C4B	Complement C4-B OS=Homo sapiens OX=9606 GN=C4B PE=1 SV=2 - [CO4B_HUMAN]	High	0.920455	124.577
P08697	SERPINF2	Alpha-2-antiplasmin OS=Homo sapiens OX=9606 GN=SERPINF2 PE=1 SV=3 - [A2AP_HUMAN]	High	0.920455	9.18208
A0A0C4DH25	IGKV3D-20	Immunoglobulin kappa variable 3D-20 OS=Homo sapiens OX=9606 GN=IGKV3D-20 PE=3 SV=1 - [KVD20_HUMAN]	High	0.920455	6.27918
P10643	C7	Complement component C7 OS=Homo sapiens OX=9606 GN=C7 PE=1 SV=2 - [CO7_HUMAN]	High	0.920455	4.08019
P19022	CDH2	Cadherin-2 OS=Homo sapiens OX=9606 GN=CDH2 PE=1 SV=4 - [CADH2_HUMAN]	High	0.920455	3.83129
P19823	ITIH2	Inter-alpha-trypsin inhibitor heavy chain H2 OS=Homo sapiens OX=9606 GN=ITIH2 PE=1 SV=2 - [ITIH2_HUMAN]	High	0.909091	10.0601
Q5T3U5	ABCC10	Multidrug resistance-associated protein 7 OS=Homo sapiens OX=9606 GN=ABCC10 PE=1 SV=1 - [MRP7_HUMAN]	High	0.909091	5.72695
P51693	APLP1	Amyloid-like protein 1 OS=Homo sapiens OX=9606 GN=APLP1 PE=1 SV=3 - [APLP1_HUMAN]	High	0.897727	4.08239
P07357	C8A	Complement component C8 alpha chain OS=Homo sapiens OX=9606 GN=C8A PE=1 SV=2 - [CO8A_HUMAN]	High	0.897727	3.88004
P20273	CD22	B-cell receptor CD22 OS=Homo sapiens OX=9606 GN=CD22 PE=1 SV=2 - [CD22_HUMAN]	High	0.886364	15.0232
P98160	HSPG2	Basement membrane-specific heparan sulfate proteoglycan core protein OS=Homo sapiens OX=9606 GN=HSPG2 PE=1 SV=4 - [PGBM_HUMAN]	High	0.886364	5.81838
Q5T8P6	RBM26	RNA-binding protein 26 OS=Homo sapiens OX=9606 GN=RBM26 PE=1 SV=3 - [RBM26_HUMAN]	High	0.886364	4.6813
Q9Y287	ITM2B	Integral membrane protein 2B OS=Homo sapiens OX=9606 GN=ITM2B PE=1 SV=1 - [ITM2B_HUMAN]	High	0.886364	3.42607
P39060	COL18A1	Collagen alpha-1(XVIII) chain OS=Homo sapiens OX=9606 GN=COL18A1 PE=1 SV=5 - [COIA1_HUMAN]	High	0.886364	2.36176
P18065	IGFBP2	Insulin-like growth factor-binding protein 2 OS=Homo sapiens OX=9606 GN=IGFBP2 PE=1 SV=2 - [IBP2_HUMAN]	High	0.875	3.77951
P10645	CHGA	Chromogranin-A OS=Homo sapiens OX=9606 GN=CHGA PE=1 SV=7 - [CMGA_HUMAN]	High	0.875	3.70894
P05067	APP	Amyloid-beta precursor protein OS=Homo sapiens OX=9606 GN=APP PE=1 SV=3 - [A4_HUMAN]	High	0.863636	10.0793
P08294	SOD3	Extracellular superoxide dismutase [Cu-Zn] OS=Homo sapiens OX=9606 GN=SOD3 PE=1 SV=2 - [SODE_HUMAN]	High	0.863636	5.85666
Q92765	FRZB	Secreted frizzled-related protein 3 OS=Homo sapiens OX=9606 GN=FRZB PE=1 SV=2 - [SFRP3_HUMAN]	High	0.863636	4.79403
Q96S96	PEBP4	Phosphatidylethanolamine-binding protein 4 OS=Homo sapiens OX=9606 GN=PEBP4 PE=1 SV=3 - [PEBP4_HUMAN]	High	0.863636	3.75943
P01780	IGHV3-7	Immunoglobulin heavy variable 3-7 OS=Homo sapiens OX=9606 GN=IGHV3-7 PE=1 SV=2 - [HV307_HUMAN]	High	0.852273	4.97146
Q9HCJ0	TNRC6C	Trinucleotide repeat-containing gene 6C protein OS=Homo sapiens OX=9606 GN=TNRC6C PE=1 SV=3 - [TNR6C_HUMAN]	High	0.852273	3.69977
O15240	VGF	Neurosecretory protein VGF OS=Homo sapiens OX=9606 GN=VGF PE=1 SV=2 - [VGF_HUMAN]	High	0.852273	2.73973
P02675	FGB	Fibrinogen beta chain OS=Homo sapiens OX=9606 GN=FGB PE=1 SV=2 - [FIBB_HUMAN]	High	0.840909	6.74664
P55083	MFAP4	Microfibril-associated glycoprotein 4 OS=Homo sapiens OX=9606 GN=MFAP4 PE=1 SV=2 - [MFAP4_HUMAN]	High	0.840909	2.80966
P22914	CRYGS	Gamma-crystallin S OS=Homo sapiens OX=9606 GN=CRYGS PE=1 SV=4 - [CRYGS_HUMAN]	High	0.829545	6.39779
P00441	SOD1	Superoxide dismutase [Cu-Zn] OS=Homo sapiens OX=9606 GN=SOD1 PE=1 SV=2 - [SODC_HUMAN]	High	0.829545	2.83762
P34096	RNASE4	Ribonuclease 4 OS=Homo sapiens OX=9606 GN=RNASE4 PE=1 SV=3 - [RNAS4_HUMAN]	High	0.829545	1.81211
Q9Y6R7	FCGBP	IgGFc-binding protein OS=Homo sapiens OX=9606 GN=FCGBP PE=1 SV=3 - [FCGBP_HUMAN]	High	0.818182	6.89482
O75326	SEMA7A	Semaphorin-7A OS=Homo sapiens OX=9606 GN=SEMA7A PE=1 SV=1 - [SEM7A_HUMAN]	High	0.818182	5.49174
P00736	C1R	Complement C1r subcomponent OS=Homo sapiens OX=9606 GN=C1R PE=1 SV=2 - [C1R_HUMAN]	High	0.818182	4.49038
Q9BZV3	IMPG2	Interphotoreceptor matrix proteoglycan 2 OS=Homo sapiens OX=9606 GN=IMPG2 PE=1 SV=3 - [IMPG2_HUMAN]	High	0.806818	3.07464
A0A087WSY6	IGKV3D-15	Immunoglobulin kappa variable 3D-15 OS=Homo sapiens OX=9606 GN=IGKV3D-15 PE=3 SV=6 - [KVD15_HUMAN]	High	0.806818	2.17459
P61626	LYZ	Lysozyme C OS=Homo sapiens OX=9606 GN=LYZ PE=1 SV=1 - [LYSC_HUMAN]	High	0.795455	4.83193
P43251	BTD	Biotinidase OS=Homo sapiens OX=9606 GN=BTD PE=1 SV=2 - [BTD_HUMAN]	High	0.795455	2.71236
P06733	ENO1	Alpha-enolase OS=Homo sapiens OX=9606 GN=ENO1 PE=1 SV=2 - [ENOA_HUMAN]	High	0.784091	12.0483
P29622	SERPINA4	Kallistatin OS=Homo sapiens OX=9606 GN=SERPINA4 PE=1 SV=3 - [KAIN_HUMAN]	High	0.784091	5.0297
P05546	SERPIND1	Heparin cofactor 2 OS=Homo sapiens OX=9606 GN=SERPIND1 PE=1 SV=3 - [HEP2_HUMAN]	High	0.784091	5.02847
P08185	SERPINA6	Corticosteroid-binding globulin OS=Homo sapiens OX=9606 GN=SERPINA6 PE=1 SV=1 - [CBG_HUMAN]	High	0.784091	3.86351
Q7Z7G0	ABI3BP	Target of Nesh-SH3 OS=Homo sapiens OX=9606 GN=ABI3BP PE=1 SV=1 - [TARSH_HUMAN]	High	0.784091	2.72049
P04406	GAPDH	Glyceraldehyde-3-phosphate dehydrogenase OS=Homo sapiens OX=9606 GN=GAPDH PE=1 SV=3 - [G3P_HUMAN]	High	0.772727	5.62558
P01593	IGKV1D-33	Immunoglobulin kappa variable 1D-33 OS=Homo sapiens OX=9606 GN=IGKV1D-33 PE=1 SV=2 - [KVD33_HUMAN]	High	0.772727	2.93072
P02679	FGG	Fibrinogen gamma chain OS=Homo sapiens OX=9606 GN=FGG PE=1 SV=3 - [FIBG_HUMAN]	High	0.761364	4.91981
Q66K66	TMEM198	Transmembrane protein 198 OS=Homo sapiens OX=9606 GN=TMEM198 PE=1 SV=1 - [TM198_HUMAN]	High	0.761364	4.39747
P02656	APOC3	Apolipoprotein C-III OS=Homo sapiens OX=9606 GN=APOC3 PE=1 SV=1 - [APOC3_HUMAN]	High	0.761364	3.18589
P13671	C6	Complement component C6 OS=Homo sapiens OX=9606 GN=C6 PE=1 SV=3 - [CO6_HUMAN]	High	0.761364	2.96249
Q99574	SERPINI1	Neuroserpin OS=Homo sapiens OX=9606 GN=SERPINI1 PE=1 SV=1 - [NEUS_HUMAN]	High	0.761364	2.37545
P04264	KRT1	Keratin, type II cytoskeletal 1 OS=Homo sapiens OX=9606 GN=KRT1 PE=1 SV=6 - [K2C1_HUMAN]	High	0.75	36.8634
Q9UHG2	PCSK1N	ProSAAS OS=Homo sapiens OX=9606 GN=PCSK1N PE=1 SV=1 - [PCS1N_HUMAN]	High	0.75	3.27815
P08571	CD14	Monocyte differentiation antigen CD14 OS=Homo sapiens OX=9606 GN=CD14 PE=1 SV=2 - [CD14_HUMAN]	High	0.75	2.47811
Q86UD1	OAF	Out at first protein homolog OS=Homo sapiens OX=9606 GN=OAF PE=2 SV=1 - [OAF_HUMAN]	High	0.75	2.11564
P98164	LRP2	Low-density lipoprotein receptor-related protein 2 OS=Homo sapiens OX=9606 GN=LRP2 PE=1 SV=3 - [LRP2_HUMAN]	High	0.75	1.83691
O60888	CUTA	Protein CutA OS=Homo sapiens OX=9606 GN=CUTA PE=1 SV=2 - [CUTA_HUMAN]	Medium	0.738636	2.64224
P35527	KRT9	Keratin, type I cytoskeletal 9 OS=Homo sapiens OX=9606 GN=KRT9 PE=1 SV=3 - [K1C9_HUMAN]	Medium	0.727273	32.2592
P12259	F5	Coagulation factor V OS=Homo sapiens OX=9606 GN=F5 PE=1 SV=4 - [FA5_HUMAN]	Medium	0.727273	4.86105
P13521	SCG2	Secretogranin-2 OS=Homo sapiens OX=9606 GN=SCG2 PE=1 SV=2 - [SCG2_HUMAN]	Medium	0.727273	2.93976
O00468	AGRN	Agrin OS=Homo sapiens OX=9606 GN=AGRN PE=1 SV=6 - [AGRIN_HUMAN]	Medium	0.727273	2.05127
Q14118	DAG1	Dystroglycan OS=Homo sapiens OX=9606 GN=DAG1 PE=1 SV=2 - [DAG1_HUMAN]	Medium	0.727273	1.52337
P0C0L4	C4A	Complement C4-A OS=Homo sapiens OX=9606 GN=C4A PE=1 SV=2 - [CO4A_HUMAN]	Medium	0.704545	90.2836
Q16610	ECM1	Extracellular matrix protein 1 OS=Homo sapiens OX=9606 GN=ECM1 PE=1 SV=2 - [ECM1_HUMAN]	Medium	0.704545	2.11196
P60709	ACTB	Actin, cytoplasmic 1 OS=Homo sapiens OX=9606 GN=ACTB PE=1 SV=1 - [ACTB_HUMAN]	Medium	0.693182	3.16697
P05543	SERPINA7	Thyroxine-binding globulin OS=Homo sapiens OX=9606 GN=SERPINA7 PE=1 SV=2 - [THBG_HUMAN]	Medium	0.693182	2.32135
P16035	TIMP2	Metalloproteinase inhibitor 2 OS=Homo sapiens OX=9606 GN=TIMP2 PE=1 SV=2 - [TIMP2_HUMAN]	Medium	0.693182	1.77195
O75882	ATRN	Attractin OS=Homo sapiens OX=9606 GN=ATRN PE=1 SV=2 - [ATRN_HUMAN]	Medium	0.693182	0.98896
P0DOX5		Immunoglobulin gamma-1 heavy chain OS=Homo sapiens OX=9606 PE=1 SV=2 - [IGG1_HUMAN]	Medium	0.681818	202.658
Q15904	ATP6AP1	V-type proton ATPase subunit S1 OS=Homo sapiens OX=9606 GN=ATP6AP1 PE=1 SV=2 - [VAS1_HUMAN]	Medium	0.681818	1.77473
P01031	C5	Complement C5 OS=Homo sapiens OX=9606 GN=C5 PE=1 SV=4 - [CO5_HUMAN]	Medium	0.670455	1.9858
P09871	C1S	Complement C1s subcomponent OS=Homo sapiens OX=9606 GN=C1S PE=1 SV=1 - [C1S_HUMAN]	Medium	0.670455	1.81831
Q9BU40	CHRDL1	Chordin-like protein 1 OS=Homo sapiens OX=9606 GN=CHRDL1 PE=1 SV=2 - [CRDL1_HUMAN]	Medium	0.670455	1.6538
Q8WXD2	SCG3	Secretogranin-3 OS=Homo sapiens OX=9606 GN=SCG3 PE=1 SV=3 - [SCG3_HUMAN]	Medium	0.670455	1.57076
Q8WZ42	TTN	Titin OS=Homo sapiens OX=9606 GN=TTN PE=1 SV=4 - [TITIN_HUMAN]	Medium	0.670455	1.31076
Q96JP9	CDHR1	Cadherin-related family member 1 OS=Homo sapiens OX=9606 GN=CDHR1 PE=1 SV=2 - [CDHR1_HUMAN]	Medium	0.670455	1.05507
P13645	KRT10	Keratin, type I cytoskeletal 10 OS=Homo sapiens OX=9606 GN=KRT10 PE=1 SV=6 - [K1C10_HUMAN]	Medium	0.659091	30.316
P02671	FGA	Fibrinogen alpha chain OS=Homo sapiens OX=9606 GN=FGA PE=1 SV=2 - [FIBA_HUMAN]	Medium	0.659091	4.07658
P07358	C8B	Complement component C8 beta chain OS=Homo sapiens OX=9606 GN=C8B PE=1 SV=3 - [CO8B_HUMAN]	Medium	0.659091	2.41484
Q9BY67	CADM1	Cell adhesion molecule 1 OS=Homo sapiens OX=9606 GN=CADM1 PE=1 SV=2 - [CADM1_HUMAN]	Medium	0.659091	1.36344
P05154	SERPINA5	Plasma serine protease inhibitor OS=Homo sapiens OX=9606 GN=SERPINA5 PE=1 SV=3 - [IPSP_HUMAN]	Medium	0.659091	1.29481
Q7Z3B1	NEGR1	Neuronal growth regulator 1 OS=Homo sapiens OX=9606 GN=NEGR1 PE=1 SV=3 - [NEGR1_HUMAN]	Medium	0.659091	1.22592
A0A0B4J1U7	IGHV6-1	Immunoglobulin heavy variable 6-1 OS=Homo sapiens OX=9606 GN=IGHV6-1 PE=3 SV=1 - [HV601_HUMAN]	Medium	0.647727	5.20112
Q8NEM8	AGBL3	Cytosolic carboxypeptidase 3 OS=Homo sapiens OX=9606 GN=AGBL3 PE=2 SV=2 - [CBPC3_HUMAN]	Medium	0.647727	2.26898
A0A0A0MS15	IGHV3-49	Immunoglobulin heavy variable 3-49 OS=Homo sapiens OX=9606 GN=IGHV3-49 PE=3 SV=1 - [HV349_HUMAN]	Medium	0.647727	2.20325
A0A0C4DH38	IGHV5-51	Immunoglobulin heavy variable 5-51 OS=Homo sapiens OX=9606 GN=IGHV5-51 PE=3 SV=1 - [HV551_HUMAN]	Medium	0.647727	1.82012
P24593	IGFBP5	Insulin-like growth factor-binding protein 5 OS=Homo sapiens OX=9606 GN=IGFBP5 PE=1 SV=1 - [IBP5_HUMAN]	Medium	0.647727	1.52215
Q13449	LSAMP	Limbic system-associated membrane protein OS=Homo sapiens OX=9606 GN=LSAMP PE=1 SV=2 - [LSAMP_HUMAN]	Medium	0.647727	1.31825
P30838	ALDH3A1	Aldehyde dehydrogenase, dimeric NADP-preferring OS=Homo sapiens OX=9606 GN=ALDH3A1 PE=1 SV=3 - [AL3A1_HUMAN]	Medium	0.636364	4.14895
P19827	ITIH1	Inter-alpha-trypsin inhibitor heavy chain H1 OS=Homo sapiens OX=9606 GN=ITIH1 PE=1 SV=3 - [ITIH1_HUMAN]	Medium	0.636364	2.65012
A0A0C4DH67	IGKV1-8	Immunoglobulin kappa variable 1-8 OS=Homo sapiens OX=9606 GN=IGKV1-8 PE=3 SV=1 - [KV108_HUMAN]	Medium	0.636364	1.87881
A0A075B6P5	IGKV2-28	Immunoglobulin kappa variable 2-28 OS=Homo sapiens OX=9606 GN=IGKV2-28 PE=3 SV=1 - [KV228_HUMAN]	Medium	0.625	2.1044
Q6EMK4	VASN	Vasorin OS=Homo sapiens OX=9606 GN=VASN PE=1 SV=1 - [VASN_HUMAN]	Medium	0.625	1.33355
P35908	KRT2	Keratin, type II cytoskeletal 2 epidermal OS=Homo sapiens OX=9606 GN=KRT2 PE=1 SV=2 - [K22E_HUMAN]	Medium	0.613636	17.5129
P14618	PKM	Pyruvate kinase PKM OS=Homo sapiens OX=9606 GN=PKM PE=1 SV=4 - [KPYM_HUMAN]	Medium	0.613636	3.25232
P02751	FN1	Fibronectin OS=Homo sapiens OX=9606 GN=FN1 PE=1 SV=5 - [FINC_HUMAN]	Medium	0.613636	2.10046
P07360	C8G	Complement component C8 gamma chain OS=Homo sapiens OX=9606 GN=C8G PE=1 SV=3 - [CO8G_HUMAN]	Medium	0.613636	1.33084
Q14055	COL9A2	Collagen alpha-2(IX) chain OS=Homo sapiens OX=9606 GN=COL9A2 PE=1 SV=2 - [CO9A2_HUMAN]	Medium	0.613636	1.25149
Q9P121	NTM	Neurotrimin OS=Homo sapiens OX=9606 GN=NTM PE=1 SV=1 - [NTRI_HUMAN]	Medium	0.613636	1.07593
P0DOX2		Immunoglobulin alpha-2 heavy chain OS=Homo sapiens OX=9606 PE=1 SV=2 - [IGA2_HUMAN]	Medium	0.602273	9.80876
Q12841	FSTL1	Follistatin-related protein 1 OS=Homo sapiens OX=9606 GN=FSTL1 PE=1 SV=1 - [FSTL1_HUMAN]	Medium	0.602273	0.96849
P01703	IGLV1-40	Immunoglobulin lambda variable 1-40 OS=Homo sapiens OX=9606 GN=IGLV1-40 PE=1 SV=2 - [LV140_HUMAN]	Medium	0.602273	0.91606
O15537	RS1	Retinoschisin OS=Homo sapiens OX=9606 GN=RS1 PE=1 SV=2 - [XLRS1_HUMAN]	Medium	0.590909	1.71804
P27169	PON1	Serum paraoxonase/arylesterase 1 OS=Homo sapiens OX=9606 GN=PON1 PE=1 SV=3 - [PON1_HUMAN]	Medium	0.590909	1.67259
P06681	C2	Complement C2 OS=Homo sapiens OX=9606 GN=C2 PE=1 SV=2 - [CO2_HUMAN]	Medium	0.590909	1.21462
P68871	HBB	Hemoglobin subunit beta OS=Homo sapiens OX=9606 GN=HBB PE=1 SV=2 - [HBB_HUMAN]	Medium	0.579545	39.9484
Q6P995	FAM171B	Protein FAM171B OS=Homo sapiens OX=9606 GN=FAM171B PE=2 SV=3 - [F171B_HUMAN]	Medium	0.579545	1.30204
P30086	PEBP1	Phosphatidylethanolamine-binding protein 1 OS=Homo sapiens OX=9606 GN=PEBP1 PE=1 SV=3 - [PEBP1_HUMAN]	Medium	0.579545	1.06799
P08253	MMP2	72 kDa type IV collagenase OS=Homo sapiens OX=9606 GN=MMP2 PE=1 SV=2 - [MMP2_HUMAN]	Medium	0.579545	1.02014
P07858	CTSB	Cathepsin B OS=Homo sapiens OX=9606 GN=CTSB PE=1 SV=3 - [CATB_HUMAN]	Medium	0.579545	0.92788
P09211	GSTP1	Glutathione S-transferase P OS=Homo sapiens OX=9606 GN=GSTP1 PE=1 SV=2 - [GSTP1_HUMAN]	Medium	0.568182	1.86648
Q9NZN5	ARHGEF12	Rho guanine nucleotide exchange factor 12 OS=Homo sapiens OX=9606 GN=ARHGEF12 PE=1 SV=1 - [ARHGC_HUMAN]	Medium	0.568182	1.27802
Q02818	NUCB1	Nucleobindin-1 OS=Homo sapiens OX=9606 GN=NUCB1 PE=1 SV=4 - [NUCB1_HUMAN]	Medium	0.568182	0.98289
P01344	IGF2	Insulin-like growth factor II OS=Homo sapiens OX=9606 GN=IGF2 PE=1 SV=1 - [IGF2_HUMAN]	Medium	0.568182	0.67336
Q9H3U1	UNC45A	Protein unc-45 homolog A OS=Homo sapiens OX=9606 GN=UNC45A PE=1 SV=1 - [UN45A_HUMAN]	Medium	0.556818	1.21649
O95428	PAPLN	Papilin OS=Homo sapiens OX=9606 GN=PAPLN PE=2 SV=4 - [PPN_HUMAN]	Medium	0.556818	1.10046
Q13347	EIF3I	Eukaryotic translation initiation factor 3 subunit I OS=Homo sapiens OX=9606 GN=EIF3I PE=1 SV=1 - [EIF3I_HUMAN]	Medium	0.545455	2.2622
Q9UGM5	FETUB	Fetuin-B OS=Homo sapiens OX=9606 GN=FETUB PE=1 SV=2 - [FETUB_HUMAN]	Medium	0.545455	1.25039
Q5VXU1	NKAIN2	Sodium/potassium-transporting ATPase subunit beta-1-interacting protein 2 OS=Homo sapiens OX=9606 GN=NKAIN2 PE=2 SV=1 - [NKAI2_HUMAN]	Medium	0.545455	0.98024
O43809	NUDT21	Cleavage and polyadenylation specificity factor subunit 5 OS=Homo sapiens OX=9606 GN=NUDT21 PE=1 SV=1 - [CPSF5_HUMAN]	Medium	0.534091	1.70629
Q14520	HABP2	Hyaluronan-binding protein 2 OS=Homo sapiens OX=9606 GN=HABP2 PE=1 SV=1 - [HABP2_HUMAN]	Medium	0.534091	1.24483
Q17R60	IMPG1	Interphotoreceptor matrix proteoglycan 1 OS=Homo sapiens OX=9606 GN=IMPG1 PE=1 SV=2 - [IMPG1_HUMAN]	Medium	0.534091	1.11757
O00391	QSOX1	Sulfhydryl oxidase 1 OS=Homo sapiens OX=9606 GN=QSOX1 PE=1 SV=3 - [QSOX1_HUMAN]	Medium	0.534091	1.00129
Q14050	COL9A3	Collagen alpha-3(IX) chain OS=Homo sapiens OX=9606 GN=COL9A3 PE=1 SV=2 - [CO9A3_HUMAN]	Medium	0.534091	0.99167
P51172	SCNN1D	Amiloride-sensitive sodium channel subunit delta OS=Homo sapiens OX=9606 GN=SCNN1D PE=1 SV=3 - [SCNND_HUMAN]	Medium	0.522727	1.94163
P78509	RELN	Reelin OS=Homo sapiens OX=9606 GN=RELN PE=1 SV=3 - [RELN_HUMAN]	Medium	0.522727	1.53319
Q32MH5	FAM214A	Protein FAM214A OS=Homo sapiens OX=9606 GN=FAM214A PE=1 SV=2 - [F214A_HUMAN]	Medium	0.522727	1.15102
A0A075B6K5	IGLV3-9	Immunoglobulin lambda variable 3-9 OS=Homo sapiens OX=9606 GN=IGLV3-9 PE=3 SV=1 - [LV39_HUMAN]	Medium	0.522727	0.99974
O94885	SASH1	SAM and SH3 domain-containing protein 1 OS=Homo sapiens OX=9606 GN=SASH1 PE=1 SV=3 - [SASH1_HUMAN]	Medium	0.522727	0.99955
P12109	COL6A1	Collagen alpha-1(VI) chain OS=Homo sapiens OX=9606 GN=COL6A1 PE=1 SV=3 - [CO6A1_HUMAN]	Medium	0.522727	0.96255
Q86UX2	ITIH5	Inter-alpha-trypsin inhibitor heavy chain H5 OS=Homo sapiens OX=9606 GN=ITIH5 PE=2 SV=2 - [ITIH5_HUMAN]	Medium	0.522727	0.94912
Q6UXY1	BAIAP2L2	Brain-specific angiogenesis inhibitor 1-associated protein 2-like protein 2 OS=Homo sapiens OX=9606 GN=BAIAP2L2 PE=1 SV=1 - [BI2L2_HUMAN]	Medium	0.522727	0.85143
O00584	RNASET2	Ribonuclease T2 OS=Homo sapiens OX=9606 GN=RNASET2 PE=1 SV=2 - [RNT2_HUMAN]	Medium	0.522727	0.81056
P49908	SELENOP	Selenoprotein P OS=Homo sapiens OX=9606 GN=SELENOP PE=1 SV=3 - [SEPP1_HUMAN]	Medium	0.522727	0.7737
P04156	PRNP	Major prion protein OS=Homo sapiens OX=9606 GN=PRNP PE=1 SV=1 - [PRIO_HUMAN]	Medium	0.522727	0.67058
A3KN83	SBNO1	Protein strawberry notch homolog 1 OS=Homo sapiens OX=9606 GN=SBNO1 PE=1 SV=1 - [SBNO1_HUMAN]	Medium	0.511364	1.9047
P04792	HSPB1	Heat shock protein beta-1 OS=Homo sapiens OX=9606 GN=HSPB1 PE=1 SV=2 - [HSPB1_HUMAN]	Medium	0.511364	1.85008
P09486	SPARC	SPARC OS=Homo sapiens OX=9606 GN=SPARC PE=1 SV=1 - [SPRC_HUMAN]	Medium	0.511364	1.30127
Q5T7N2	L1TD1	LINE-1 type transposase domain-containing protein 1 OS=Homo sapiens OX=9606 GN=L1TD1 PE=1 SV=1 - [LITD1_HUMAN]	Medium	0.511364	1.15005
O75132	ZBED4	Zinc finger BED domain-containing protein 4 OS=Homo sapiens OX=9606 GN=ZBED4 PE=1 SV=2 - [ZBED4_HUMAN]	Medium	0.511364	1.0729
Q92823	NRCAM	Neuronal cell adhesion molecule OS=Homo sapiens OX=9606 GN=NRCAM PE=1 SV=3 - [NRCAM_HUMAN]	Medium	0.511364	1.0306
P17900	GM2A	Ganglioside GM2 activator OS=Homo sapiens OX=9606 GN=GM2A PE=1 SV=4 - [SAP3_HUMAN]	Medium	0.511364	0.80688
P69905	HBA1	Hemoglobin subunit alpha OS=Homo sapiens OX=9606 GN=HBA1 PE=1 SV=2 - [HBA_HUMAN]	Medium	0.5	19.9057
P05060	CHGB	Secretogranin-1 OS=Homo sapiens OX=9606 GN=CHGB PE=1 SV=2 - [SCG1_HUMAN]	Medium	0.5	1.23838
P49441	INPP1	Inositol polyphosphate 1-phosphatase OS=Homo sapiens OX=9606 GN=INPP1 PE=1 SV=1 - [INPP_HUMAN]	Medium	0.5	1.04629
P80188	LCN2	Neutrophil gelatinase-associated lipocalin OS=Homo sapiens OX=9606 GN=LCN2 PE=1 SV=2 - [NGAL_HUMAN]	Medium	0.5	1.03002
P0CG48	UBC	Polyubiquitin-C OS=Homo sapiens OX=9606 GN=UBC PE=1 SV=3 - [UBC_HUMAN]	Medium	0.5	0.73289
Q8WVF5	KCTD4	BTB/POZ domain-containing protein KCTD4 OS=Homo sapiens OX=9606 GN=KCTD4 PE=1 SV=2 - [KCTD4_HUMAN]	Low	0.488636	4.08729
P00558	PGK1	Phosphoglycerate kinase 1 OS=Homo sapiens OX=9606 GN=PGK1 PE=1 SV=3 - [PGK1_HUMAN]	Low	0.488636	1.25826
Q8N2C7	UNC80	Protein unc-80 homolog OS=Homo sapiens OX=9606 GN=UNC80 PE=1 SV=2 - [UNC80_HUMAN]	Low	0.488636	0.79319
Q02487	DSC2	Desmocollin-2 OS=Homo sapiens OX=9606 GN=DSC2 PE=1 SV=1 - [DSC2_HUMAN]	Low	0.488636	0.59704
P42262	GRIA2	Glutamate receptor 2 OS=Homo sapiens OX=9606 GN=GRIA2 PE=1 SV=3 - [GRIA2_HUMAN]	Low	0.477273	2.31334
Q8N475	FSTL5	Follistatin-related protein 5 OS=Homo sapiens OX=9606 GN=FSTL5 PE=2 SV=2 - [FSTL5_HUMAN]	Low	0.477273	1.3575
Q92797	SYMPK	Symplekin OS=Homo sapiens OX=9606 GN=SYMPK PE=1 SV=2 - [SYMPK_HUMAN]	Low	0.477273	0.9189
Q92563	SPOCK2	Testican-2 OS=Homo sapiens OX=9606 GN=SPOCK2 PE=1 SV=1 - [TICN2_HUMAN]	Low	0.477273	0.90044
P55058	PLTP	Phospholipid transfer protein OS=Homo sapiens OX=9606 GN=PLTP PE=1 SV=1 - [PLTP_HUMAN]	Low	0.477273	0.869
P03950	ANG	Angiogenin OS=Homo sapiens OX=9606 GN=ANG PE=1 SV=1 - [ANGI_HUMAN]	Low	0.465909	0.82722
P20849	COL9A1	Collagen alpha-1(IX) chain OS=Homo sapiens OX=9606 GN=COL9A1 PE=1 SV=3 - [CO9A1_HUMAN]	Low	0.465909	0.75232
Q12860	CNTN1	Contactin-1 OS=Homo sapiens OX=9606 GN=CNTN1 PE=1 SV=1 - [CNTN1_HUMAN]	Low	0.465909	0.72624
Q14508	WFDC2	WAP four-disulfide core domain protein 2 OS=Homo sapiens OX=9606 GN=WFDC2 PE=1 SV=2 - [WFDC2_HUMAN]	Low	0.465909	0.61925
P01825	IGHV4-59	Immunoglobulin heavy variable 4-59 OS=Homo sapiens OX=9606 GN=IGHV4-59 PE=1 SV=2 - [HV459_HUMAN]	Low	0.454545	3.6055
P05408	SCG5	Neuroendocrine protein 7B2 OS=Homo sapiens OX=9606 GN=SCG5 PE=1 SV=2 - [7B2_HUMAN]	Low	0.454545	1.07386
Q96KN2	CNDP1	Beta-Ala-His dipeptidase OS=Homo sapiens OX=9606 GN=CNDP1 PE=1 SV=4 - [CNDP1_HUMAN]	Low	0.454545	0.84336
P15918	RAG1	V(D)J recombination-activating protein 1 OS=Homo sapiens OX=9606 GN=RAG1 PE=1 SV=2 - [RAG1_HUMAN]	Low	0.454545	0.8085
Q16769	QPCT	Glutaminyl-peptide cyclotransferase OS=Homo sapiens OX=9606 GN=QPCT PE=1 SV=1 - [QPCT_HUMAN]	Low	0.454545	0.59821
A0A0A0MRZ8	IGKV3D-11	Immunoglobulin kappa variable 3D-11 OS=Homo sapiens OX=9606 GN=IGKV3D-11 PE=3 SV=6 - [KVD11_HUMAN]	Low	0.443182	3.02021
Q92954	PRG4	Proteoglycan 4 OS=Homo sapiens OX=9606 GN=PRG4 PE=1 SV=3 - [PRG4_HUMAN]	Low	0.443182	0.93724
P60174	TPI1	Triosephosphate isomerase OS=Homo sapiens OX=9606 GN=TPI1 PE=1 SV=4 - [TPIS_HUMAN]	Low	0.443182	0.78319
P01721	IGLV6-57	Immunoglobulin lambda variable 6-57 OS=Homo sapiens OX=9606 GN=IGLV6-57 PE=1 SV=2 - [LV657_HUMAN]	Low	0.443182	0.75652
Q9BYJ0	FGFBP2	Fibroblast growth factor-binding protein 2 OS=Homo sapiens OX=9606 GN=FGFBP2 PE=1 SV=1 - [FGFP2_HUMAN]	Low	0.443182	0.54533
P29401	TKT	Transketolase OS=Homo sapiens OX=9606 GN=TKT PE=1 SV=3 - [TKT_HUMAN]	Low	0.431818	1.50826
A0A075B6N3	TRBV24-1	T cell receptor beta variable 24-1 OS=Homo sapiens OX=9606 GN=TRBV24-1 PE=3 SV=1 - [TVBX1_HUMAN]	Low	0.431818	1.23489
Q96IY4	CPB2	Carboxypeptidase B2 OS=Homo sapiens OX=9606 GN=CPB2 PE=1 SV=2 - [CBPB2_HUMAN]	Low	0.431818	1.00471
P61812	TGFB2	Transforming growth factor beta-2 proprotein OS=Homo sapiens OX=9606 GN=TGFB2 PE=1 SV=1 - [TGFB2_HUMAN]	Low	0.431818	0.58813
P02788	LTF	Lactotransferrin OS=Homo sapiens OX=9606 GN=LTF PE=1 SV=6 - [TRFL_HUMAN]	Low	0.420455	0.80572
A0A0C4DH72	IGKV1-6	Immunoglobulin kappa variable 1-6 OS=Homo sapiens OX=9606 GN=IGKV1-6 PE=3 SV=1 - [KV106_HUMAN]	Low	0.420455	0.78777
Q13510	ASAH1	Acid ceramidase OS=Homo sapiens OX=9606 GN=ASAH1 PE=1 SV=5 - [ASAH1_HUMAN]	Low	0.420455	0.77537
P13591	NCAM1	Neural cell adhesion molecule 1 OS=Homo sapiens OX=9606 GN=NCAM1 PE=1 SV=3 - [NCAM1_HUMAN]	Low	0.420455	0.65031
Q86XX4	FRAS1	Extracellular matrix protein FRAS1 OS=Homo sapiens OX=9606 GN=FRAS1 PE=1 SV=2 - [FRAS1_HUMAN]	Low	0.420455	0.61351
Q969T7	NT5C3B	7-methylguanosine phosphate-specific 5'-nucleotidase OS=Homo sapiens OX=9606 GN=NT5C3B PE=1 SV=4 - [5NT3B_HUMAN]	Low	0.409091	9.00471
Q9Y4C1	KDM3A	Lysine-specific demethylase 3A OS=Homo sapiens OX=9606 GN=KDM3A PE=1 SV=4 - [KDM3A_HUMAN]	Low	0.409091	1.0368
P18428	LBP	Lipopolysaccharide-binding protein OS=Homo sapiens OX=9606 GN=LBP PE=1 SV=3 - [LBP_HUMAN]	Low	0.409091	0.76123
Q8TAG5	VSTM2A	V-set and transmembrane domain-containing protein 2A OS=Homo sapiens OX=9606 GN=VSTM2A PE=1 SV=3 - [VTM2A_HUMAN]	Low	0.409091	0.54584
P13473	LAMP2	Lysosome-associated membrane glycoprotein 2 OS=Homo sapiens OX=9606 GN=LAMP2 PE=1 SV=2 - [LAMP2_HUMAN]	Low	0.397727	0.79268
O95153	TSPOAP1	Peripheral-type benzodiazepine receptor-associated protein 1 OS=Homo sapiens OX=9606 GN=TSPOAP1 PE=1 SV=2 - [RIMB1_HUMAN]	Low	0.386364	1.17814
Q8WXI7	MUC16	Mucin-16 OS=Homo sapiens OX=9606 GN=MUC16 PE=1 SV=3 - [MUC16_HUMAN]	Low	0.386364	0.8422
P22760	AADAC	Arylacetamide deacetylase OS=Homo sapiens OX=9606 GN=AADAC PE=1 SV=5 - [AAAD_HUMAN]	Low	0.386364	0.62616
Q9UM54	MYO6	Unconventional myosin-VI OS=Homo sapiens OX=9606 GN=MYO6 PE=1 SV=4 - [MYO6_HUMAN]	Low	0.386364	0.60744
P43320	CRYBB2	Beta-crystallin B2 OS=Homo sapiens OX=9606 GN=CRYBB2 PE=1 SV=2 - [CRBB2_HUMAN]	Low	0.375	2.49645
P07315	CRYGC	Gamma-crystallin C OS=Homo sapiens OX=9606 GN=CRYGC PE=1 SV=2 - [CRGC_HUMAN]	Low	0.375	2.11151
A0A075B6H7	IGKV3-7	Probable non-functional immunoglobulin kappa variable 3-7 OS=Homo sapiens OX=9606 GN=IGKV3-7 PE=1 SV=1 - [KV37_HUMAN]	Low	0.375	0.61196
P16070	CD44	CD44 antigen OS=Homo sapiens OX=9606 GN=CD44 PE=1 SV=3 - [CD44_HUMAN]	Low	0.375	0.54081
Q6UX71	PLXDC2	Plexin domain-containing protein 2 OS=Homo sapiens OX=9606 GN=PLXDC2 PE=1 SV=1 - [PXDC2_HUMAN]	Low	0.375	0.41142
Q5T1R4	HIVEP3	Transcription factor HIVEP3 OS=Homo sapiens OX=9606 GN=HIVEP3 PE=2 SV=1 - [ZEP3_HUMAN]	Low	0.363636	0.51143
Q92743	HTRA1	Serine protease HTRA1 OS=Homo sapiens OX=9606 GN=HTRA1 PE=1 SV=1 - [HTRA1_HUMAN]	Low	0.363636	0.38217
Q03591	CFHR1	Complement factor H-related protein 1 OS=Homo sapiens OX=9606 GN=CFHR1 PE=1 SV=2 - [FHR1_HUMAN]	Low	0.352273	2.37765
Q8WVZ7	RNF133	E3 ubiquitin-protein ligase RNF133 OS=Homo sapiens OX=9606 GN=RNF133 PE=2 SV=1 - [RN133_HUMAN]	Low	0.352273	0.63275
Q9NQQ7	SLC35C2	Solute carrier family 35 member C2 OS=Homo sapiens OX=9606 GN=SLC35C2 PE=1 SV=2 - [S35C2_HUMAN]	Low	0.352273	0.57457
P20774	OGN	Mimecan OS=Homo sapiens OX=9606 GN=OGN PE=1 SV=1 - [MIME_HUMAN]	Low	0.352273	0.40644
P21246	PTN	Pleiotrophin OS=Homo sapiens OX=9606 GN=PTN PE=1 SV=1 - [PTN_HUMAN]	Low	0.352273	0.38036
O00533	CHL1	Neural cell adhesion molecule L1-like protein OS=Homo sapiens OX=9606 GN=CHL1 PE=1 SV=4 - [NCHL1_HUMAN]	Low	0.352273	0.35014
P02533	KRT14	Keratin, type I cytoskeletal 14 OS=Homo sapiens OX=9606 GN=KRT14 PE=1 SV=4 - [K1C14_HUMAN]	Low	0.340909	6.03706
P21817	RYR1	Ryanodine receptor 1 OS=Homo sapiens OX=9606 GN=RYR1 PE=1 SV=3 - [RYR1_HUMAN]	Low	0.340909	0.87319
Q96C92	ENTR1	Endosome-associated-trafficking regulator 1 OS=Homo sapiens OX=9606 GN=ENTR1 PE=1 SV=3 - [ENTR1_HUMAN]	Low	0.340909	0.66923
Q9NR09	BIRC6	Baculoviral IAP repeat-containing protein 6 OS=Homo sapiens OX=9606 GN=BIRC6 PE=1 SV=2 - [BIRC6_HUMAN]	Low	0.340909	0.59065
P35443	THBS4	Thrombospondin-4 OS=Homo sapiens OX=9606 GN=THBS4 PE=1 SV=2 - [TSP4_HUMAN]	Low	0.340909	0.56457
Q96SN8	CDK5RAP2	CDK5 regulatory subunit-associated protein 2 OS=Homo sapiens OX=9606 GN=CDK5RAP2 PE=1 SV=5 - [CK5P2_HUMAN]	Low	0.340909	0.4652
A0A0C4DH42	IGHV3-66	Immunoglobulin heavy variable 3-66 OS=Homo sapiens OX=9606 GN=IGHV3-66 PE=3 SV=1 - [HV366_HUMAN]	Low	0.340909	0.44886
P20929	NEB	Nebulin OS=Homo sapiens OX=9606 GN=NEB PE=1 SV=5 - [NEBU_HUMAN]	Low	0.340909	0.38895
P80723	BASP1	Brain acid soluble protein 1 OS=Homo sapiens OX=9606 GN=BASP1 PE=1 SV=2 - [BASP1_HUMAN]	Low	0.340909	0.35886
P31025	LCN1	Lipocalin-1 OS=Homo sapiens OX=9606 GN=LCN1 PE=1 SV=1 - [LCN1_HUMAN]	Low	0.329545	1.44609
P41271	NBL1	Neuroblastoma suppressor of tumorigenicity 1 OS=Homo sapiens OX=9606 GN=NBL1 PE=1 SV=2 - [NBL1_HUMAN]	Low	0.329545	0.91361
Q149M9	NWD1	NACHT domain- and WD repeat-containing protein 1 OS=Homo sapiens OX=9606 GN=NWD1 PE=1 SV=3 - [NWD1_HUMAN]	Low	0.329545	0.64566
Q96FE7	PIK3IP1	Phosphoinositide-3-kinase-interacting protein 1 OS=Homo sapiens OX=9606 GN=PIK3IP1 PE=1 SV=2 - [P3IP1_HUMAN]	Low	0.329545	0.52421
O14862	AIM2	Interferon-inducible protein AIM2 OS=Homo sapiens OX=9606 GN=AIM2 PE=1 SV=1 - [AIM2_HUMAN]	Low	0.329545	0.52415
P00338	LDHA	L-lactate dehydrogenase A chain OS=Homo sapiens OX=9606 GN=LDHA PE=1 SV=2 - [LDHA_HUMAN]	Low	0.329545	0.48444
P07585	DCN	Decorin OS=Homo sapiens OX=9606 GN=DCN PE=1 SV=1 - [PGS2_HUMAN]	Low	0.329545	0.463
P35858	IGFALS	Insulin-like growth factor-binding protein complex acid labile subunit OS=Homo sapiens OX=9606 GN=IGFALS PE=1 SV=1 - [ALS_HUMAN]	Low	0.329545	0.45887
P01857	IGHG1	Immunoglobulin heavy constant gamma 1 OS=Homo sapiens OX=9606 GN=IGHG1 PE=1 SV=1 - [IGHG1_HUMAN]	Low	0.318182	89.8262
A0PK00	TMEM120B	Transmembrane protein 120B OS=Homo sapiens OX=9606 GN=TMEM120B PE=1 SV=1 - [T120B_HUMAN]	Low	0.318182	1.09465
P15291	B4GALT1	Beta-1,4-galactosyltransferase 1 OS=Homo sapiens OX=9606 GN=B4GALT1 PE=1 SV=5 - [B4GT1_HUMAN]	Low	0.318182	0.48509
Q14129	DGCR6	Protein DGCR6 OS=Homo sapiens OX=9606 GN=DGCR6 PE=1 SV=3 - [DGCR6_HUMAN]	Low	0.318182	0.47475
Q9Y646	CPQ	Carboxypeptidase Q OS=Homo sapiens OX=9606 GN=CPQ PE=1 SV=1 - [CBPQ_HUMAN]	Low	0.318182	0.46158
Q0VDD8	DNAH14	Dynein heavy chain 14, axonemal OS=Homo sapiens OX=9606 GN=DNAH14 PE=2 SV=3 - [DYH14_HUMAN]	Low	0.318182	0.40941
P01871	IGHM	Immunoglobulin heavy constant mu OS=Homo sapiens OX=9606 GN=IGHM PE=1 SV=4 - [IGHM_HUMAN]	Low	0.306818	3.8032
Q9Y4C0	NRXN3	Neurexin-3 OS=Homo sapiens OX=9606 GN=NRXN3 PE=1 SV=4 - [NRX3A_HUMAN]	Low	0.306818	0.47359
P15586	GNS	N-acetylglucosamine-6-sulfatase OS=Homo sapiens OX=9606 GN=GNS PE=1 SV=3 - [GNS_HUMAN]	Low	0.306818	0.45384
Q92535	PIGC	Phosphatidylinositol N-acetylglucosaminyltransferase subunit C OS=Homo sapiens OX=9606 GN=PIGC PE=1 SV=1 - [PIGC_HUMAN]	Low	0.306818	0.4355
Q96JC1	VPS39	Vam6/Vps39-like protein OS=Homo sapiens OX=9606 GN=VPS39 PE=1 SV=2 - [VPS39_HUMAN]	Low	0.306818	0.38811
Q9UKM9	RALY	RNA-binding protein Raly OS=Homo sapiens OX=9606 GN=RALY PE=1 SV=1 - [RALY_HUMAN]	Low	0.306818	0.38636
Q9BRK5	SDF4	45 kDa calcium-binding protein OS=Homo sapiens OX=9606 GN=SDF4 PE=1 SV=1 - [CAB45_HUMAN]	Low	0.306818	0.33639
Q96T58	SPEN	Msx2-interacting protein OS=Homo sapiens OX=9606 GN=SPEN PE=1 SV=1 - [MINT_HUMAN]	Low	0.306818	0.31528
P00352	ALDH1A1	Retinal dehydrogenase 1 OS=Homo sapiens OX=9606 GN=ALDH1A1 PE=1 SV=2 - [AL1A1_HUMAN]	Low	0.295455	1.20093
P17735	TAT	Tyrosine aminotransferase OS=Homo sapiens OX=9606 GN=TAT PE=1 SV=1 - [ATTY_HUMAN]	Low	0.295455	0.89456
Q15361	TTF1	Transcription termination factor 1 OS=Homo sapiens OX=9606 GN=TTF1 PE=1 SV=3 - [TTF1_HUMAN]	Low	0.295455	0.69686
Q9ULH0	KIDINS220	Kinase D-interacting substrate of 220 kDa OS=Homo sapiens OX=9606 GN=KIDINS220 PE=1 SV=3 - [KDIS_HUMAN]	Low	0.295455	0.6208
Q9NVV4	MTPAP	Poly(A) RNA polymerase, mitochondrial OS=Homo sapiens OX=9606 GN=MTPAP PE=1 SV=1 - [PAPD1_HUMAN]	Low	0.295455	0.46294
P54274	TERF1	Telomeric repeat-binding factor 1 OS=Homo sapiens OX=9606 GN=TERF1 PE=1 SV=3 - [TERF1_HUMAN]	Low	0.295455	0.42136
Q96JK2	DCAF5	DDB1- and CUL4-associated factor 5 OS=Homo sapiens OX=9606 GN=DCAF5 PE=1 SV=2 - [DCAF5_HUMAN]	Low	0.295455	0.40619
P07225	PROS1	Vitamin K-dependent protein S OS=Homo sapiens OX=9606 GN=PROS1 PE=1 SV=1 - [PROS_HUMAN]	Low	0.295455	0.37067
Q9UDY6	TRIM10	Tripartite motif-containing protein 10 OS=Homo sapiens OX=9606 GN=TRIM10 PE=1 SV=3 - [TRI10_HUMAN]	Low	0.295455	0.35079
O95967	EFEMP2	EGF-containing fibulin-like extracellular matrix protein 2 OS=Homo sapiens OX=9606 GN=EFEMP2 PE=1 SV=3 - [FBLN4_HUMAN]	Low	0.295455	0.29345
Q05BV3	EML5	Echinoderm microtubule-associated protein-like 5 OS=Homo sapiens OX=9606 GN=EML5 PE=2 SV=3 - [EMAL5_HUMAN]	Low	0.295455	0.26588
Q5T0Z8	C6orf132	Uncharacterized protein C6orf132 OS=Homo sapiens OX=9606 GN=C6orf132 PE=1 SV=4 - [CF132_HUMAN]	Low	0.284091	0.6935
A0A0B4J2D9	IGKV1D-13	Immunoglobulin kappa variable 1D-13 OS=Homo sapiens OX=9606 GN=IGKV1D-13 PE=3 SV=1 - [KVD13_HUMAN]	Low	0.284091	0.52537
P27797	CALR	Calreticulin OS=Homo sapiens OX=9606 GN=CALR PE=1 SV=1 - [CALR_HUMAN]	Low	0.284091	0.30972
O95237	LRAT	Lecithin retinol acyltransferase OS=Homo sapiens OX=9606 GN=LRAT PE=1 SV=2 - [LRAT_HUMAN]	Low	0.284091	0.26291
Q13214	SEMA3B	Semaphorin-3B OS=Homo sapiens OX=9606 GN=SEMA3B PE=1 SV=1 - [SEM3B_HUMAN]	Low	0.284091	0.25536
Q92485	SMPDL3B	Acid sphingomyelinase-like phosphodiesterase 3b OS=Homo sapiens OX=9606 GN=SMPDL3B PE=1 SV=2 - [ASM3B_HUMAN]	Low	0.272727	0.70229
Q9UPR6	ZFR2	Zinc finger RNA-binding protein 2 OS=Homo sapiens OX=9606 GN=ZFR2 PE=2 SV=3 - [ZFR2_HUMAN]	Low	0.272727	0.61925
Q8NHQ9	DDX55	ATP-dependent RNA helicase DDX55 OS=Homo sapiens OX=9606 GN=DDX55 PE=1 SV=3 - [DDX55_HUMAN]	Low	0.272727	0.40199
Q8IWY4	SCUBE1	Signal peptide, CUB and EGF-like domain-containing protein 1 OS=Homo sapiens OX=9606 GN=SCUBE1 PE=1 SV=3 - [SCUB1_HUMAN]	Low	0.272727	0.27886
P36980	CFHR2	Complement factor H-related protein 2 OS=Homo sapiens OX=9606 GN=CFHR2 PE=1 SV=1 - [FHR2_HUMAN]	Low	0.261364	0.93601
P07320	CRYGD	Gamma-crystallin D OS=Homo sapiens OX=9606 GN=CRYGD PE=1 SV=3 - [CRGD_HUMAN]	Low	0.261364	0.68453
A6NCI8	C2orf78	Uncharacterized protein C2orf78 OS=Homo sapiens OX=9606 GN=C2orf78 PE=2 SV=3 - [CB078_HUMAN]	Low	0.261364	0.66936
Q9C0B1	FTO	Alpha-ketoglutarate-dependent dioxygenase FTO OS=Homo sapiens OX=9606 GN=FTO PE=1 SV=3 - [FTO_HUMAN]	Low	0.261364	0.40173
P02747	C1QC	Complement C1q subcomponent subunit C OS=Homo sapiens OX=9606 GN=C1QC PE=1 SV=3 - [C1QC_HUMAN]	Low	0.261364	0.39437
Q53EL9	SEZ6	Seizure protein 6 homolog OS=Homo sapiens OX=9606 GN=SEZ6 PE=1 SV=2 - [SEZ6_HUMAN]	Low	0.261364	0.39095
Q5VST9	OBSCN	Obscurin OS=Homo sapiens OX=9606 GN=OBSCN PE=1 SV=3 - [OBSCN_HUMAN]	Low	0.261364	0.31263
O60308	CEP104	Centrosomal protein of 104 kDa OS=Homo sapiens OX=9606 GN=CEP104 PE=1 SV=1 - [CE104_HUMAN]	Low	0.261364	0.30436
Q96RW7	HMCN1	Hemicentin-1 OS=Homo sapiens OX=9606 GN=HMCN1 PE=1 SV=2 - [HMCN1_HUMAN]	Low	0.261364	0.2777
Q03001	DST	Dystonin OS=Homo sapiens OX=9606 GN=DST PE=1 SV=4 - [DYST_HUMAN]	Low	0.261364	0.26233
P06865	HEXA	Beta-hexosaminidase subunit alpha OS=Homo sapiens OX=9606 GN=HEXA PE=1 SV=2 - [HEXA_HUMAN]	Low	0.261364	0.25949
Q9UBR2	CTSZ	Cathepsin Z OS=Homo sapiens OX=9606 GN=CTSZ PE=1 SV=1 - [CATZ_HUMAN]	Low	0.261364	0.25052
Q6ZMV5	PPP4R3C	Protein PPP4R3C OS=Homo sapiens OX=9606 GN=PPP4R3C PE=2 SV=3 - [P4R3C_HUMAN]	Low	0.25	0.7214
Q7Z2K8	GPRIN1	G protein-regulated inducer of neurite outgrowth 1 OS=Homo sapiens OX=9606 GN=GPRIN1 PE=1 SV=2 - [GRIN1_HUMAN]	Low	0.25	0.71875
Q06830	PRDX1	Peroxiredoxin-1 OS=Homo sapiens OX=9606 GN=PRDX1 PE=1 SV=1 - [PRDX1_HUMAN]	Low	0.25	0.52783
Q9NS87	KIF15	Kinesin-like protein KIF15 OS=Homo sapiens OX=9606 GN=KIF15 PE=1 SV=1 - [KIF15_HUMAN]	Low	0.25	0.50529
Q8N5U6	RNF10	RING finger protein 10 OS=Homo sapiens OX=9606 GN=RNF10 PE=1 SV=2 - [RNF10_HUMAN]	Low	0.25	0.36557
Q7Z4L5	TTC21B	Tetratricopeptide repeat protein 21B OS=Homo sapiens OX=9606 GN=TTC21B PE=1 SV=2 - [TT21B_HUMAN]	Low	0.25	0.33652
A6H8M9	CDHR4	Cadherin-related family member 4 OS=Homo sapiens OX=9606 GN=CDHR4 PE=2 SV=1 - [CDHR4_HUMAN]	Low	0.25	0.33135
O60938	KERA	Keratocan OS=Homo sapiens OX=9606 GN=KERA PE=1 SV=1 - [KERA_HUMAN]	Low	0.25	0.2828
O14514	ADGRB1	Adhesion G protein-coupled receptor B1 OS=Homo sapiens OX=9606 GN=ADGRB1 PE=1 SV=2 - [AGRB1_HUMAN]	Low	0.25	0.28202
Q9HCE0	EPG5	Ectopic P granules protein 5 homolog OS=Homo sapiens OX=9606 GN=EPG5 PE=1 SV=2 - [EPG5_HUMAN]	Low	0.25	0.25149
P17936	IGFBP3	Insulin-like growth factor-binding protein 3 OS=Homo sapiens OX=9606 GN=IGFBP3 PE=1 SV=2 - [IBP3_HUMAN]	Low	0.25	0.19079
P01782	IGHV3-9	Immunoglobulin heavy variable 3-9 OS=Homo sapiens OX=9606 GN=IGHV3-9 PE=1 SV=2 - [HV309_HUMAN]	Rare	0.238636	0.78267
P63104	YWHAZ	14-3-3 protein zeta/delta OS=Homo sapiens OX=9606 GN=YWHAZ PE=1 SV=1 - [1433Z_HUMAN]	Rare	0.238636	0.63991
Q7Z4H7	HAUS6	HAUS augmin-like complex subunit 6 OS=Homo sapiens OX=9606 GN=HAUS6 PE=1 SV=2 - [HAUS6_HUMAN]	Rare	0.238636	0.60124
Q9H1H9	KIF13A	Kinesin-like protein KIF13A OS=Homo sapiens OX=9606 GN=KIF13A PE=1 SV=2 - [KI13A_HUMAN]	Rare	0.238636	0.45067
Q8J025	APCDD1	Protein APCDD1 OS=Homo sapiens OX=9606 GN=APCDD1 PE=1 SV=1 - [APCD1_HUMAN]	Rare	0.238636	0.43317
Q9H497	TOR3A	Torsin-3A OS=Homo sapiens OX=9606 GN=TOR3A PE=1 SV=1 - [TOR3A_HUMAN]	Rare	0.238636	0.32625
Q9UNW1	MINPP1	Multiple inositol polyphosphate phosphatase 1 OS=Homo sapiens OX=9606 GN=MINPP1 PE=1 SV=1 - [MINP1_HUMAN]	Rare	0.238636	0.2531
Q8NI35	PATJ	InaD-like protein OS=Homo sapiens OX=9606 GN=PATJ PE=1 SV=3 - [INADL_HUMAN]	Rare	0.238636	0.25232
O14960	LECT2	Leukocyte cell-derived chemotaxin-2 OS=Homo sapiens OX=9606 GN=LECT2 PE=1 SV=2 - [LECT2_HUMAN]	Rare	0.238636	0.24709
Q9Y6H5	SNCAIP	Synphilin-1 OS=Homo sapiens OX=9606 GN=SNCAIP PE=1 SV=2 - [SNCAP_HUMAN]	Rare	0.238636	0.24645
Q4G0P3	HYDIN	Hydrocephalus-inducing protein homolog OS=Homo sapiens OX=9606 GN=HYDIN PE=1 SV=3 - [HYDIN_HUMAN]	Rare	0.238636	0.23625
P02042	HBD	Hemoglobin subunit delta OS=Homo sapiens OX=9606 GN=HBD PE=1 SV=2 - [HBD_HUMAN]	Rare	0.227273	10.6778
P02538	KRT6A	Keratin, type II cytoskeletal 6A OS=Homo sapiens OX=9606 GN=KRT6A PE=1 SV=3 - [K2C6A_HUMAN]	Rare	0.227273	8.28312
A6NCW0	USP17L3	Ubiquitin carboxyl-terminal hydrolase 17-like protein 3 OS=Homo sapiens OX=9606 GN=USP17L3 PE=3 SV=1 - [U17L3_HUMAN]	Rare	0.227273	0.44183
Q03167	TGFBR3	Transforming growth factor beta receptor type 3 OS=Homo sapiens OX=9606 GN=TGFBR3 PE=1 SV=3 - [TGBR3_HUMAN]	Rare	0.227273	0.34401
Q6P1M9	ARMCX5	Armadillo repeat-containing X-linked protein 5 OS=Homo sapiens OX=9606 GN=ARMCX5 PE=1 SV=1 - [ARMX5_HUMAN]	Rare	0.227273	0.33632
Q12768	WASHC5	WASH complex subunit 5 OS=Homo sapiens OX=9606 GN=WASHC5 PE=1 SV=1 - [WASC5_HUMAN]	Rare	0.227273	0.30959
Q9H4L5	OSBPL3	Oxysterol-binding protein-related protein 3 OS=Homo sapiens OX=9606 GN=OSBPL3 PE=1 SV=1 - [OSBL3_HUMAN]	Rare	0.227273	0.30178
Q99523	SORT1	Sortilin OS=Homo sapiens OX=9606 GN=SORT1 PE=1 SV=3 - [SORT_HUMAN]	Rare	0.227273	0.29545
P08247	SYP	Synaptophysin OS=Homo sapiens OX=9606 GN=SYP PE=1 SV=3 - [SYPH_HUMAN]	Rare	0.227273	0.28745
P51570	GALK1	Galactokinase OS=Homo sapiens OX=9606 GN=GALK1 PE=1 SV=1 - [GALK1_HUMAN]	Rare	0.227273	0.28015
Q9GZV5	WWTR1	WW domain-containing transcription regulator protein 1 OS=Homo sapiens OX=9606 GN=WWTR1 PE=1 SV=1 - [WWTR1_HUMAN]	Rare	0.227273	0.27957
P02746	C1QB	Complement C1q subcomponent subunit B OS=Homo sapiens OX=9606 GN=C1QB PE=1 SV=3 - [C1QB_HUMAN]	Rare	0.227273	0.17452
P13647	KRT5	Keratin, type II cytoskeletal 5 OS=Homo sapiens OX=9606 GN=KRT5 PE=1 SV=3 - [K2C5_HUMAN]	Rare	0.215909	6.3054
P08779	KRT16	Keratin, type I cytoskeletal 16 OS=Homo sapiens OX=9606 GN=KRT16 PE=1 SV=4 - [K1C16_HUMAN]	Rare	0.215909	5.20306
P15559	NQO1	NAD(P)H dehydrogenase [quinone] 1 OS=Homo sapiens OX=9606 GN=NQO1 PE=1 SV=1 - [NQO1_HUMAN]	Rare	0.215909	0.39514
Q9GZZ9	UBA5	Ubiquitin-like modifier-activating enzyme 5 OS=Homo sapiens OX=9606 GN=UBA5 PE=1 SV=1 - [UBA5_HUMAN]	Rare	0.215909	0.38378
Q7Z5M8	ABHD12B	Protein ABHD12B OS=Homo sapiens OX=9606 GN=ABHD12B PE=2 SV=1 - [AB12B_HUMAN]	Rare	0.215909	0.28868
Q6NUN9	ZNF746	Zinc finger protein 746 OS=Homo sapiens OX=9606 GN=ZNF746 PE=1 SV=1 - [ZN746_HUMAN]	Rare	0.215909	0.28732
P11532	DMD	Dystrophin OS=Homo sapiens OX=9606 GN=DMD PE=1 SV=3 - [DMD_HUMAN]	Rare	0.215909	0.28422
Q15678	PTPN14	Tyrosine-protein phosphatase non-receptor type 14 OS=Homo sapiens OX=9606 GN=PTPN14 PE=1 SV=2 - [PTN14_HUMAN]	Rare	0.215909	0.27738
Q5XX13	FBXW10	F-box/WD repeat-containing protein 10 OS=Homo sapiens OX=9606 GN=FBXW10 PE=2 SV=2 - [FBW10_HUMAN]	Rare	0.215909	0.27073
O75629	CREG1	Protein CREG1 OS=Homo sapiens OX=9606 GN=CREG1 PE=1 SV=1 - [CREG1_HUMAN]	Rare	0.215909	0.27008
Q8TE73	DNAH5	Dynein heavy chain 5, axonemal OS=Homo sapiens OX=9606 GN=DNAH5 PE=1 SV=3 - [DYH5_HUMAN]	Rare	0.215909	0.25336
P22304	IDS	Iduronate 2-sulfatase OS=Homo sapiens OX=9606 GN=IDS PE=1 SV=1 - [IDS_HUMAN]	Rare	0.215909	0.2254
Q16568	CARTPT	Cocaine- and amphetamine-regulated transcript protein OS=Homo sapiens OX=9606 GN=CARTPT PE=1 SV=1 - [CART_HUMAN]	Rare	0.215909	0.19099
P63267	ACTG2	Actin, gamma-enteric smooth muscle OS=Homo sapiens OX=9606 GN=ACTG2 PE=1 SV=1 - [ACTH_HUMAN]	Rare	0.204545	0.67071
P0DMV8	HSPA1A	Heat shock 70 kDa protein 1A OS=Homo sapiens OX=9606 GN=HSPA1A PE=1 SV=1 - [HS71A_HUMAN]	Rare	0.204545	0.45183
Q8TB22	SPATA20	Spermatogenesis-associated protein 20 OS=Homo sapiens OX=9606 GN=SPATA20 PE=2 SV=3 - [SPT20_HUMAN]	Rare	0.204545	0.44867
A0A0C4DH43	IGHV2-70D	Immunoglobulin heavy variable 2-70D OS=Homo sapiens OX=9606 GN=IGHV2-70D PE=3 SV=1 - [HV70D_HUMAN]	Rare	0.204545	0.414
P04439	HLA-A	HLA class I histocompatibility antigen, A alpha chain OS=Homo sapiens OX=9606 GN=HLA-A PE=1 SV=2 - [HLAA_HUMAN]	Rare	0.204545	0.38979
Q6MZW2	FSTL4	Follistatin-related protein 4 OS=Homo sapiens OX=9606 GN=FSTL4 PE=2 SV=3 - [FSTL4_HUMAN]	Rare	0.204545	0.32057
Q86UQ4	ABCA13	ATP-binding cassette sub-family A member 13 OS=Homo sapiens OX=9606 GN=ABCA13 PE=2 SV=3 - [ABCAD_HUMAN]	Rare	0.204545	0.31915
Q86YM7	HOMER1	Homer protein homolog 1 OS=Homo sapiens OX=9606 GN=HOMER1 PE=1 SV=2 - [HOME1_HUMAN]	Rare	0.204545	0.31347
Q8WXH0	SYNE2	Nesprin-2 OS=Homo sapiens OX=9606 GN=SYNE2 PE=1 SV=3 - [SYNE2_HUMAN]	Rare	0.204545	0.30792
P56975	NRG3	Pro-neuregulin-3, membrane-bound isoform OS=Homo sapiens OX=9606 GN=NRG3 PE=1 SV=1 - [NRG3_HUMAN]	Rare	0.204545	0.30269
P45844	ABCG1	ATP-binding cassette sub-family G member 1 OS=Homo sapiens OX=9606 GN=ABCG1 PE=1 SV=3 - [ABCG1_HUMAN]	Rare	0.204545	0.27583
Q86VR7	VSIG10L	V-set and immunoglobulin domain-containing protein 10-like OS=Homo sapiens OX=9606 GN=VSIG10L PE=2 SV=2 - [VS10L_HUMAN]	Rare	0.204545	0.2737
Q86UK0	ABCA12	ATP-binding cassette sub-family A member 12 OS=Homo sapiens OX=9606 GN=ABCA12 PE=1 SV=3 - [ABCAC_HUMAN]	Rare	0.204545	0.2571
O94898	LRIG2	Leucine-rich repeats and immunoglobulin-like domains protein 2 OS=Homo sapiens OX=9606 GN=LRIG2 PE=1 SV=3 - [LRIG2_HUMAN]	Rare	0.204545	0.25032
Q9UHL4	DPP7	Dipeptidyl peptidase 2 OS=Homo sapiens OX=9606 GN=DPP7 PE=1 SV=3 - [DPP2_HUMAN]	Rare	0.204545	0.23993
Q96M86	DNHD1	Dynein heavy chain domain-containing protein 1 OS=Homo sapiens OX=9606 GN=DNHD1 PE=2 SV=2 - [DNHD1_HUMAN]	Rare	0.204545	0.23438
P15259	PGAM2	Phosphoglycerate mutase 2 OS=Homo sapiens OX=9606 GN=PGAM2 PE=1 SV=3 - [PGAM2_HUMAN]	Rare	0.204545	0.23334
Q14393	GAS6	Growth arrest-specific protein 6 OS=Homo sapiens OX=9606 GN=GAS6 PE=1 SV=3 - [GAS6_HUMAN]	Rare	0.204545	0.23082
Q8N271	PROM2	Prominin-2 OS=Homo sapiens OX=9606 GN=PROM2 PE=1 SV=1 - [PROM2_HUMAN]	Rare	0.204545	0.21346
Q14204	DYNC1H1	Cytoplasmic dynein 1 heavy chain 1 OS=Homo sapiens OX=9606 GN=DYNC1H1 PE=1 SV=5 - [DYHC1_HUMAN]	Rare	0.204545	0.20706
Q12797	ASPH	Aspartyl/asparaginyl beta-hydroxylase OS=Homo sapiens OX=9606 GN=ASPH PE=1 SV=3 - [ASPH_HUMAN]	Rare	0.204545	0.19234
P54317	PNLIPRP2	Pancreatic lipase-related protein 2 OS=Homo sapiens OX=9606 GN=PNLIPRP2 PE=1 SV=2 - [LIPR2_HUMAN]	Rare	0.193182	1.03958
Q01469	FABP5	Fatty acid-binding protein 5 OS=Homo sapiens OX=9606 GN=FABP5 PE=1 SV=3 - [FABP5_HUMAN]	Rare	0.193182	0.64075
Q9H061	TMEM126A	Transmembrane protein 126A OS=Homo sapiens OX=9606 GN=TMEM126A PE=1 SV=1 - [T126A_HUMAN]	Rare	0.193182	0.44686
Q9BX84	TRPM6	Transient receptor potential cation channel subfamily M member 6 OS=Homo sapiens OX=9606 GN=TRPM6 PE=1 SV=2 - [TRPM6_HUMAN]	Rare	0.193182	0.44609
Q6EMB2	TTLL5	Tubulin polyglutamylase TTLL5 OS=Homo sapiens OX=9606 GN=TTLL5 PE=1 SV=3 - [TTLL5_HUMAN]	Rare	0.193182	0.33652
Q2TB90	HKDC1	Hexokinase HKDC1 OS=Homo sapiens OX=9606 GN=HKDC1 PE=1 SV=3 - [HKDC1_HUMAN]	Rare	0.193182	0.30546
Q15050	RRS1	Ribosome biogenesis regulatory protein homolog OS=Homo sapiens OX=9606 GN=RRS1 PE=1 SV=2 - [RRS1_HUMAN]	Rare	0.193182	0.29778
Q8N1C3	GABRG1	Gamma-aminobutyric acid receptor subunit gamma-1 OS=Homo sapiens OX=9606 GN=GABRG1 PE=2 SV=2 - [GBRG1_HUMAN]	Rare	0.193182	0.29068
Q5CZC0	FSIP2	Fibrous sheath-interacting protein 2 OS=Homo sapiens OX=9606 GN=FSIP2 PE=2 SV=4 - [FSIP2_HUMAN]	Rare	0.193182	0.28538
Q6SZW1	SARM1	NAD(+) hydrolase SARM1 OS=Homo sapiens OX=9606 GN=SARM1 PE=1 SV=1 - [SARM1_HUMAN]	Rare	0.193182	0.27053
Q9BX40	LSM14B	Protein LSM14 homolog B OS=Homo sapiens OX=9606 GN=LSM14B PE=1 SV=1 - [LS14B_HUMAN]	Rare	0.193182	0.26433
Q9H329	EPB41L4B	Band 4.1-like protein 4B OS=Homo sapiens OX=9606 GN=EPB41L4B PE=2 SV=2 - [E41LB_HUMAN]	Rare	0.193182	0.26065
P51688	SGSH	N-sulphoglucosamine sulphohydrolase OS=Homo sapiens OX=9606 GN=SGSH PE=1 SV=1 - [SPHM_HUMAN]	Rare	0.193182	0.23199
P27361	MAPK3	Mitogen-activated protein kinase 3 OS=Homo sapiens OX=9606 GN=MAPK3 PE=1 SV=4 - [MK03_HUMAN]	Rare	0.193182	0.22979
Q8NHP8	PLBD2	Putative phospholipase B-like 2 OS=Homo sapiens OX=9606 GN=PLBD2 PE=1 SV=2 - [PLBL2_HUMAN]	Rare	0.193182	0.22837
Q5T9S5	CCDC18	Coiled-coil domain-containing protein 18 OS=Homo sapiens OX=9606 GN=CCDC18 PE=1 SV=1 - [CCD18_HUMAN]	Rare	0.193182	0.20015
Q99435	NELL2	Protein kinase C-binding protein NELL2 OS=Homo sapiens OX=9606 GN=NELL2 PE=1 SV=1 - [NELL2_HUMAN]	Rare	0.193182	0.19538
O14498	ISLR	Immunoglobulin superfamily containing leucine-rich repeat protein OS=Homo sapiens OX=9606 GN=ISLR PE=2 SV=1 - [ISLR_HUMAN]	Rare	0.193182	0.19163
P07711	CTSL	Procathepsin L OS=Homo sapiens OX=9606 GN=CTSL PE=1 SV=2 - [CATL1_HUMAN]	Rare	0.193182	0.17349
O95025	SEMA3D	Semaphorin-3D OS=Homo sapiens OX=9606 GN=SEMA3D PE=2 SV=2 - [SEM3D_HUMAN]	Rare	0.193182	0.14527
Q7Z5P9	MUC19	Mucin-19 OS=Homo sapiens OX=9606 GN=MUC19 PE=1 SV=3 - [MUC19_HUMAN]	Rare	0.181818	0.38682
Q5TEJ8	THEMIS2	Protein THEMIS2 OS=Homo sapiens OX=9606 GN=THEMIS2 PE=1 SV=1 - [THMS2_HUMAN]	Rare	0.181818	0.32612
O75197	LRP5	Low-density lipoprotein receptor-related protein 5 OS=Homo sapiens OX=9606 GN=LRP5 PE=1 SV=2 - [LRP5_HUMAN]	Rare	0.181818	0.30733
Q9BZA7	PCDH11X	Protocadherin-11 X-linked OS=Homo sapiens OX=9606 GN=PCDH11X PE=2 SV=1 - [PC11X_HUMAN]	Rare	0.181818	0.29468
P13807	GYS1	Glycogen [starch] synthase, muscle OS=Homo sapiens OX=9606 GN=GYS1 PE=1 SV=2 - [GYS1_HUMAN]	Rare	0.181818	0.29229
O95628	CNOT4	CCR4-NOT transcription complex subunit 4 OS=Homo sapiens OX=9606 GN=CNOT4 PE=1 SV=3 - [CNOT4_HUMAN]	Rare	0.181818	0.28377
Q15648	MED1	Mediator of RNA polymerase II transcription subunit 1 OS=Homo sapiens OX=9606 GN=MED1 PE=1 SV=4 - [MED1_HUMAN]	Rare	0.181818	0.27757
Q5SW79	CEP170	Centrosomal protein of 170 kDa OS=Homo sapiens OX=9606 GN=CEP170 PE=1 SV=1 - [CE170_HUMAN]	Rare	0.181818	0.2724
O75592	MYCBP2	E3 ubiquitin-protein ligase MYCBP2 OS=Homo sapiens OX=9606 GN=MYCBP2 PE=1 SV=4 - [MYCB2_HUMAN]	Rare	0.181818	0.24574
P01599	IGKV1-17	Immunoglobulin kappa variable 1-17 OS=Homo sapiens OX=9606 GN=IGKV1-17 PE=1 SV=2 - [KV117_HUMAN]	Rare	0.181818	0.24193
P30041	PRDX6	Peroxiredoxin-6 OS=Homo sapiens OX=9606 GN=PRDX6 PE=1 SV=3 - [PRDX6_HUMAN]	Rare	0.181818	0.24064
A0A0J9YX35	IGHV3-64D	Immunoglobulin heavy variable 3-64D OS=Homo sapiens OX=9606 GN=IGHV3-64D PE=3 SV=1 - [HV64D_HUMAN]	Rare	0.181818	0.23567
P07686	HEXB	Beta-hexosaminidase subunit beta OS=Homo sapiens OX=9606 GN=HEXB PE=1 SV=3 - [HEXB_HUMAN]	Rare	0.181818	0.22869
Q86WI1	PKHD1L1	Fibrocystin-L OS=Homo sapiens OX=9606 GN=PKHD1L1 PE=2 SV=2 - [PKHL1_HUMAN]	Rare	0.181818	0.2276
A0A075B6R9	IGKV2D-24	Probable non-functional immunoglobulin kappa variable 2D-24 OS=Homo sapiens OX=9606 GN=IGKV2D-24 PE=1 SV=1 - [KVD24_HUMAN]	Rare	0.181818	0.22379
Q5THJ4	VPS13D	Vacuolar protein sorting-associated protein 13D OS=Homo sapiens OX=9606 GN=VPS13D PE=1 SV=2 - [VP13D_HUMAN]	Rare	0.181818	0.22011
Q8N0Y3	OR4N4	Olfactory receptor 4N4 OS=Homo sapiens OX=9606 GN=OR4N4 PE=2 SV=2 - [OR4N4_HUMAN]	Rare	0.181818	0.21985
O94760	DDAH1	N(G),N(G)-dimethylarginine dimethylaminohydrolase 1 OS=Homo sapiens OX=9606 GN=DDAH1 PE=1 SV=3 - [DDAH1_HUMAN]	Rare	0.181818	0.203
P22692	IGFBP4	Insulin-like growth factor-binding protein 4 OS=Homo sapiens OX=9606 GN=IGFBP4 PE=1 SV=2 - [IBP4_HUMAN]	Rare	0.181818	0.18518
P30048	PRDX3	Thioredoxin-dependent peroxide reductase, mitochondrial OS=Homo sapiens OX=9606 GN=PRDX3 PE=1 SV=3 - [PRDX3_HUMAN]	Rare	0.181818	0.18518
P32119	PRDX2	Peroxiredoxin-2 OS=Homo sapiens OX=9606 GN=PRDX2 PE=1 SV=5 - [PRDX2_HUMAN]	Rare	0.170455	0.87416
Q7RTY8	TMPRSS7	Transmembrane protease serine 7 OS=Homo sapiens OX=9606 GN=TMPRSS7 PE=2 SV=3 - [TMPS7_HUMAN]	Rare	0.170455	0.7172
Q92985	IRF7	Interferon regulatory factor 7 OS=Homo sapiens OX=9606 GN=IRF7 PE=1 SV=2 - [IRF7_HUMAN]	Rare	0.170455	0.56024
P26447	S100A4	Protein S100-A4 OS=Homo sapiens OX=9606 GN=S100A4 PE=1 SV=1 - [S10A4_HUMAN]	Rare	0.170455	0.37642
Q9Y4A5	TRRAP	Transformation/transcription domain-associated protein OS=Homo sapiens OX=9606 GN=TRRAP PE=1 SV=3 - [TRRAP_HUMAN]	Rare	0.170455	0.33568
Q59EK9	RUNDC3A	RUN domain-containing protein 3A OS=Homo sapiens OX=9606 GN=RUNDC3A PE=1 SV=2 - [RUN3A_HUMAN]	Rare	0.170455	0.27525
A6NJL1	ZSCAN5B	Zinc finger and SCAN domain-containing protein 5B OS=Homo sapiens OX=9606 GN=ZSCAN5B PE=1 SV=1 - [ZSA5B_HUMAN]	Rare	0.170455	0.27479
Q14376	GALE	UDP-glucose 4-epimerase OS=Homo sapiens OX=9606 GN=GALE PE=1 SV=2 - [GALE_HUMAN]	Rare	0.170455	0.27331
A0A0B4J2D5	GATD3B	Glutamine amidotransferase-like class 1 domain-containing protein 3B, mitochondrial OS=Homo sapiens OX=9606 GN=GATD3B PE=1 SV=1 - [GAL3B_HUMAN]	Rare	0.170455	0.26788
Q9H6S0	YTHDC2	3'-5' RNA helicase YTHDC2 OS=Homo sapiens OX=9606 GN=YTHDC2 PE=1 SV=2 - [YTDC2_HUMAN]	Rare	0.170455	0.26504
P42330	AKR1C3	Aldo-keto reductase family 1 member C3 OS=Homo sapiens OX=9606 GN=AKR1C3 PE=1 SV=4 - [AK1C3_HUMAN]	Rare	0.170455	0.26388
O75155	CAND2	Cullin-associated NEDD8-dissociated protein 2 OS=Homo sapiens OX=9606 GN=CAND2 PE=1 SV=3 - [CAND2_HUMAN]	Rare	0.170455	0.25026
Q96N23	CFAP54	Cilia- and flagella-associated protein 54 OS=Homo sapiens OX=9606 GN=CFAP54 PE=2 SV=3 - [CFA54_HUMAN]	Rare	0.170455	0.24613
Q9BXP8	PAPPA2	Pappalysin-2 OS=Homo sapiens OX=9606 GN=PAPPA2 PE=1 SV=4 - [PAPP2_HUMAN]	Rare	0.170455	0.24245
Q9NYQ8	FAT2	Protocadherin Fat 2 OS=Homo sapiens OX=9606 GN=FAT2 PE=1 SV=2 - [FAT2_HUMAN]	Rare	0.170455	0.22721
Q86VX9	MON1A	Vacuolar fusion protein MON1 homolog A OS=Homo sapiens OX=9606 GN=MON1A PE=1 SV=3 - [MON1A_HUMAN]	Rare	0.170455	0.22611
P35900	KRT20	Keratin, type I cytoskeletal 20 OS=Homo sapiens OX=9606 GN=KRT20 PE=1 SV=1 - [K1C20_HUMAN]	Rare	0.170455	0.21513
Q5JV73	FRMPD3	FERM and PDZ domain-containing protein 3 OS=Homo sapiens OX=9606 GN=FRMPD3 PE=2 SV=2 - [FRPD3_HUMAN]	Rare	0.170455	0.20448
P35573	AGL	Glycogen debranching enzyme OS=Homo sapiens OX=9606 GN=AGL PE=1 SV=3 - [GDE_HUMAN]	Rare	0.170455	0.19602
P25092	GUCY2C	Heat-stable enterotoxin receptor OS=Homo sapiens OX=9606 GN=GUCY2C PE=1 SV=2 - [GUC2C_HUMAN]	Rare	0.170455	0.1935
Q5SRE5	NUP188	Nucleoporin NUP188 homolog OS=Homo sapiens OX=9606 GN=NUP188 PE=1 SV=1 - [NU188_HUMAN]	Rare	0.170455	0.18556
P20333	TNFRSF1B	Tumor necrosis factor receptor superfamily member 1B OS=Homo sapiens OX=9606 GN=TNFRSF1B PE=1 SV=3 - [TNR1B_HUMAN]	Rare	0.170455	0.1853
Q9Y6C2	EMILIN1	EMILIN-1 OS=Homo sapiens OX=9606 GN=EMILIN1 PE=1 SV=3 - [EMIL1_HUMAN]	Rare	0.170455	0.18376
Q96A23	CPNE4	Copine-4 OS=Homo sapiens OX=9606 GN=CPNE4 PE=1 SV=1 - [CPNE4_HUMAN]	Rare	0.170455	0.17504
Q7Z4T9	CFAP91	Cilia- and flagella-associated protein 91 OS=Homo sapiens OX=9606 GN=CFAP91 PE=1 SV=3 - [CFA91_HUMAN]	Rare	0.170455	0.16038
Q9H4D0	CLSTN2	Calsyntenin-2 OS=Homo sapiens OX=9606 GN=CLSTN2 PE=1 SV=2 - [CSTN2_HUMAN]	Rare	0.170455	0.14624
P78363	ABCA4	Retinal-specific phospholipid-transporting ATPase ABCA4 OS=Homo sapiens OX=9606 GN=ABCA4 PE=1 SV=3 - [ABCA4_HUMAN]	Rare	0.170455	0.12513
P15924	DSP	Desmoplakin OS=Homo sapiens OX=9606 GN=DSP PE=1 SV=3 - [DESP_HUMAN]	Rare	0.159091	4.4293
P00739	HPR	Haptoglobin-related protein OS=Homo sapiens OX=9606 GN=HPR PE=2 SV=2 - [HPTR_HUMAN]	Rare	0.159091	3.40683
P0DOX6		Immunoglobulin mu heavy chain OS=Homo sapiens OX=9606 PE=1 SV=2 - [IGM_HUMAN]	Rare	0.159091	2.49316
P00915	CA1	Carbonic anhydrase 1 OS=Homo sapiens OX=9606 GN=CA1 PE=1 SV=2 - [CAH1_HUMAN]	Rare	0.159091	1.7059
Q02413	DSG1	Desmoglein-1 OS=Homo sapiens OX=9606 GN=DSG1 PE=1 SV=2 - [DSG1_HUMAN]	Rare	0.159091	0.6507
O95406	CNIH1	Protein cornichon homolog 1 OS=Homo sapiens OX=9606 GN=CNIH1 PE=1 SV=1 - [CNIH1_HUMAN]	Rare	0.159091	0.35356
Q8IZF3	ADGRF4	Adhesion G protein-coupled receptor F4 OS=Homo sapiens OX=9606 GN=ADGRF4 PE=1 SV=3 - [AGRF4_HUMAN]	Rare	0.159091	0.31973
Q01954	BNC1	Zinc finger protein basonuclin-1 OS=Homo sapiens OX=9606 GN=BNC1 PE=1 SV=2 - [BNC1_HUMAN]	Rare	0.159091	0.31508
Q08426	EHHADH	Peroxisomal bifunctional enzyme OS=Homo sapiens OX=9606 GN=EHHADH PE=1 SV=3 - [ECHP_HUMAN]	Rare	0.159091	0.29268
P42345	MTOR	Serine/threonine-protein kinase mTOR OS=Homo sapiens OX=9606 GN=MTOR PE=1 SV=1 - [MTOR_HUMAN]	Rare	0.159091	0.25523
Q15149	PLEC	Plectin OS=Homo sapiens OX=9606 GN=PLEC PE=1 SV=3 - [PLEC_HUMAN]	Rare	0.159091	0.25213
Q9HCK4	ROBO2	Roundabout homolog 2 OS=Homo sapiens OX=9606 GN=ROBO2 PE=1 SV=2 - [ROBO2_HUMAN]	Rare	0.159091	0.22404
P08123	COL1A2	Collagen alpha-2(I) chain OS=Homo sapiens OX=9606 GN=COL1A2 PE=1 SV=7 - [CO1A2_HUMAN]	Rare	0.159091	0.2223
P42858	HTT	Huntingtin OS=Homo sapiens OX=9606 GN=HTT PE=1 SV=2 - [HD_HUMAN]	Rare	0.159091	0.21513
Q86XN6	ZNF761	Zinc finger protein 761 OS=Homo sapiens OX=9606 GN=ZNF761 PE=1 SV=3 - [ZN761_HUMAN]	Rare	0.159091	0.21352
Q9NS15	LTBP3	Latent-transforming growth factor beta-binding protein 3 OS=Homo sapiens OX=9606 GN=LTBP3 PE=1 SV=4 - [LTBP3_HUMAN]	Rare	0.159091	0.21307
P01602	IGKV1-5	Immunoglobulin kappa variable 1-5 OS=Homo sapiens OX=9606 GN=IGKV1-5 PE=1 SV=2 - [KV105_HUMAN]	Rare	0.159091	0.21068
P14174	MIF	Macrophage migration inhibitory factor OS=Homo sapiens OX=9606 GN=MIF PE=1 SV=4 - [MIF_HUMAN]	Rare	0.159091	0.20261
Q99758	ABCA3	ATP-binding cassette sub-family A member 3 OS=Homo sapiens OX=9606 GN=ABCA3 PE=1 SV=2 - [ABCA3_HUMAN]	Rare	0.159091	0.19925
P09238	MMP10	Stromelysin-2 OS=Homo sapiens OX=9606 GN=MMP10 PE=1 SV=1 - [MMP10_HUMAN]	Rare	0.159091	0.19544
Q8IWV7	UBR1	E3 ubiquitin-protein ligase UBR1 OS=Homo sapiens OX=9606 GN=UBR1 PE=1 SV=1 - [UBR1_HUMAN]	Rare	0.159091	0.17659
Q9UM22	EPDR1	Mammalian ependymin-related protein 1 OS=Homo sapiens OX=9606 GN=EPDR1 PE=1 SV=2 - [EPDR1_HUMAN]	Rare	0.159091	0.17433
Q9UPN3	MACF1	Microtubule-actin cross-linking factor 1, isoforms 1/2/3/5 OS=Homo sapiens OX=9606 GN=MACF1 PE=1 SV=4 - [MACF1_HUMAN]	Rare	0.159091	0.17291
P46013	MKI67	Proliferation marker protein Ki-67 OS=Homo sapiens OX=9606 GN=MKI67 PE=1 SV=2 - [KI67_HUMAN]	Rare	0.159091	0.17039
Q6MZT1	RGS7BP	Regulator of G-protein signaling 7-binding protein OS=Homo sapiens OX=9606 GN=RGS7BP PE=2 SV=3 - [R7BP_HUMAN]	Rare	0.159091	0.16994
Q15034	HERC3	Probable E3 ubiquitin-protein ligase HERC3 OS=Homo sapiens OX=9606 GN=HERC3 PE=1 SV=1 - [HERC3_HUMAN]	Rare	0.159091	0.13869
P10619	CTSA	Lysosomal protective protein OS=Homo sapiens OX=9606 GN=CTSA PE=1 SV=2 - [PPGB_HUMAN]	Rare	0.159091	0.1374
Q9HAN9	NMNAT1	Nicotinamide/nicotinic acid mononucleotide adenylyltransferase 1 OS=Homo sapiens OX=9606 GN=NMNAT1 PE=1 SV=1 - [NMNA1_HUMAN]	Rare	0.159091	0.13449
O15014	ZNF609	Zinc finger protein 609 OS=Homo sapiens OX=9606 GN=ZNF609 PE=1 SV=2 - [ZN609_HUMAN]	Rare	0.159091	0.12313
P08727	KRT19	Keratin, type I cytoskeletal 19 OS=Homo sapiens OX=9606 GN=KRT19 PE=1 SV=4 - [K1C19_HUMAN]	Rare	0.147727	0.64217
Q8TEY5	CREB3L4	Cyclic AMP-responsive element-binding protein 3-like protein 4 OS=Homo sapiens OX=9606 GN=CREB3L4 PE=1 SV=1 - [CR3L4_HUMAN]	Rare	0.147727	0.57858
P01743	IGHV1-46	Immunoglobulin heavy variable 1-46 OS=Homo sapiens OX=9606 GN=IGHV1-46 PE=1 SV=2 - [HV146_HUMAN]	Rare	0.147727	0.56721
Q13228	SELENBP1	Methanethiol oxidase OS=Homo sapiens OX=9606 GN=SELENBP1 PE=1 SV=2 - [SBP1_HUMAN]	Rare	0.147727	0.41955
Q6P4F2	FDX2	Ferredoxin-2, mitochondrial OS=Homo sapiens OX=9606 GN=FDX2 PE=1 SV=2 - [FDX2_HUMAN]	Rare	0.147727	0.33058
P07451	CA3	Carbonic anhydrase 3 OS=Homo sapiens OX=9606 GN=CA3 PE=1 SV=3 - [CAH3_HUMAN]	Rare	0.147727	0.27925
P23471	PTPRZ1	Receptor-type tyrosine-protein phosphatase zeta OS=Homo sapiens OX=9606 GN=PTPRZ1 PE=1 SV=4 - [PTPRZ_HUMAN]	Rare	0.147727	0.27402
Q96AV8	E2F7	Transcription factor E2F7 OS=Homo sapiens OX=9606 GN=E2F7 PE=1 SV=3 - [E2F7_HUMAN]	Rare	0.147727	0.26272
Q14643	ITPR1	Inositol 1,4,5-trisphosphate receptor type 1 OS=Homo sapiens OX=9606 GN=ITPR1 PE=1 SV=3 - [ITPR1_HUMAN]	Rare	0.147727	0.23315
P49788	RARRES1	Retinoic acid receptor responder protein 1 OS=Homo sapiens OX=9606 GN=RARRES1 PE=1 SV=2 - [TIG1_HUMAN]	Rare	0.147727	0.23102
P50748	KNTC1	Kinetochore-associated protein 1 OS=Homo sapiens OX=9606 GN=KNTC1 PE=1 SV=1 - [KNTC1_HUMAN]	Rare	0.147727	0.22618
O43286	B4GALT5	Beta-1,4-galactosyltransferase 5 OS=Homo sapiens OX=9606 GN=B4GALT5 PE=1 SV=1 - [B4GT5_HUMAN]	Rare	0.147727	0.21798
P33992	MCM5	DNA replication licensing factor MCM5 OS=Homo sapiens OX=9606 GN=MCM5 PE=1 SV=5 - [MCM5_HUMAN]	Rare	0.147727	0.20932
Q9BYJ1	ALOXE3	Hydroperoxide isomerase ALOXE3 OS=Homo sapiens OX=9606 GN=ALOXE3 PE=1 SV=1 - [LOXE3_HUMAN]	Rare	0.147727	0.19886
Q58DX5	NAALADL2	Inactive N-acetylated-alpha-linked acidic dipeptidase-like protein 2 OS=Homo sapiens OX=9606 GN=NAALADL2 PE=1 SV=3 - [NADL2_HUMAN]	Rare	0.147727	0.18873
Q96RY5	CRAMP1	Protein cramped-like OS=Homo sapiens OX=9606 GN=CRAMP1 PE=1 SV=3 - [CRML_HUMAN]	Rare	0.147727	0.18847
Q8IVF2	AHNAK2	Protein AHNAK2 OS=Homo sapiens OX=9606 GN=AHNAK2 PE=1 SV=2 - [AHNK2_HUMAN]	Rare	0.147727	0.18673
O15197	EPHB6	Ephrin type-B receptor 6 OS=Homo sapiens OX=9606 GN=EPHB6 PE=1 SV=4 - [EPHB6_HUMAN]	Rare	0.147727	0.18621
Q09666	AHNAK	Neuroblast differentiation-associated protein AHNAK OS=Homo sapiens OX=9606 GN=AHNAK PE=1 SV=2 - [AHNK_HUMAN]	Rare	0.147727	0.18563
Q5VZR2	NUTM2G	NUT family member 2G OS=Homo sapiens OX=9606 GN=NUTM2G PE=3 SV=2 - [NTM2G_HUMAN]	Rare	0.147727	0.18259
Q9NU22	MDN1	Midasin OS=Homo sapiens OX=9606 GN=MDN1 PE=1 SV=2 - [MDN1_HUMAN]	Rare	0.147727	0.18001
P13987	CD59	CD59 glycoprotein OS=Homo sapiens OX=9606 GN=CD59 PE=1 SV=1 - [CD59_HUMAN]	Rare	0.147727	0.17827
Q8N187	CARF	Calcium-responsive transcription factor OS=Homo sapiens OX=9606 GN=CARF PE=1 SV=2 - [CARTF_HUMAN]	Rare	0.147727	0.17775
Q3KR16	PLEKHG6	Pleckstrin homology domain-containing family G member 6 OS=Homo sapiens OX=9606 GN=PLEKHG6 PE=1 SV=3 - [PKHG6_HUMAN]	Rare	0.147727	0.168
P23458	JAK1	Tyrosine-protein kinase JAK1 OS=Homo sapiens OX=9606 GN=JAK1 PE=1 SV=2 - [JAK1_HUMAN]	Rare	0.147727	0.1629
P46939	UTRN	Utrophin OS=Homo sapiens OX=9606 GN=UTRN PE=1 SV=2 - [UTRO_HUMAN]	Rare	0.147727	0.15928
P01704	IGLV2-14	Immunoglobulin lambda variable 2-14 OS=Homo sapiens OX=9606 GN=IGLV2-14 PE=1 SV=2 - [LV214_HUMAN]	Rare	0.147727	0.15522
Q8TD57	DNAH3	Dynein heavy chain 3, axonemal OS=Homo sapiens OX=9606 GN=DNAH3 PE=2 SV=1 - [DYH3_HUMAN]	Rare	0.147727	0.15005
Q9HCJ5	ZSWIM6	Zinc finger SWIM domain-containing protein 6 OS=Homo sapiens OX=9606 GN=ZSWIM6 PE=1 SV=2 - [ZSWM6_HUMAN]	Rare	0.147727	0.1474
Q9P2D6	FAM135A	Protein FAM135A OS=Homo sapiens OX=9606 GN=FAM135A PE=1 SV=2 - [F135A_HUMAN]	Rare	0.147727	0.14657
P23975	SLC6A2	Sodium-dependent noradrenaline transporter OS=Homo sapiens OX=9606 GN=SLC6A2 PE=1 SV=1 - [SC6A2_HUMAN]	Rare	0.147727	0.14527
Q5T4S7	UBR4	E3 ubiquitin-protein ligase UBR4 OS=Homo sapiens OX=9606 GN=UBR4 PE=1 SV=1 - [UBR4_HUMAN]	Rare	0.147727	0.14469
Q01459	CTBS	Di-N-acetylchitobiase OS=Homo sapiens OX=9606 GN=CTBS PE=1 SV=1 - [DIAC_HUMAN]	Rare	0.147727	0.14411
P50851	LRBA	Lipopolysaccharide-responsive and beige-like anchor protein OS=Homo sapiens OX=9606 GN=LRBA PE=1 SV=4 - [LRBA_HUMAN]	Rare	0.147727	0.14392
Q9UKN7	MYO15A	Unconventional myosin-XV OS=Homo sapiens OX=9606 GN=MYO15A PE=1 SV=2 - [MYO15_HUMAN]	Rare	0.147727	0.1414
Q9GZX9	TWSG1	Twisted gastrulation protein homolog 1 OS=Homo sapiens OX=9606 GN=TWSG1 PE=1 SV=1 - [TWSG1_HUMAN]	Rare	0.147727	0.13404
P46531	NOTCH1	Neurogenic locus notch homolog protein 1 OS=Homo sapiens OX=9606 GN=NOTCH1 PE=1 SV=4 - [NOTC1_HUMAN]	Rare	0.147727	0.13017
Q9BXB7	SPATA16	Spermatogenesis-associated protein 16 OS=Homo sapiens OX=9606 GN=SPATA16 PE=1 SV=3 - [SPT16_HUMAN]	Rare	0.147727	0.12939
P19021	PAM	Peptidyl-glycine alpha-amidating monooxygenase OS=Homo sapiens OX=9606 GN=PAM PE=1 SV=2 - [AMD_HUMAN]	Rare	0.147727	0.12881
P29317	EPHA2	Ephrin type-A receptor 2 OS=Homo sapiens OX=9606 GN=EPHA2 PE=1 SV=2 - [EPHA2_HUMAN]	Rare	0.147727	0.12048
Q8ND24	RNF214	RING finger protein 214 OS=Homo sapiens OX=9606 GN=RNF214 PE=1 SV=2 - [RN214_HUMAN]	Rare	0.147727	0.11796
P14923	JUP	Junction plakoglobin OS=Homo sapiens OX=9606 GN=JUP PE=1 SV=3 - [PLAK_HUMAN]	Rare	0.136364	1.07651
O14983	ATP2A1	Sarcoplasmic/endoplasmic reticulum calcium ATPase 1 OS=Homo sapiens OX=9606 GN=ATP2A1 PE=1 SV=1 - [AT2A1_HUMAN]	Rare	0.136364	0.46287
A0A0B4J1X5	IGHV3-74	Immunoglobulin heavy variable 3-74 OS=Homo sapiens OX=9606 GN=IGHV3-74 PE=3 SV=1 - [HV374_HUMAN]	Rare	0.136364	0.40974
Q9Y6J8	STYXL1	Serine/threonine/tyrosine-interacting-like protein 1 OS=Homo sapiens OX=9606 GN=STYXL1 PE=1 SV=1 - [STYL1_HUMAN]	Rare	0.136364	0.39844
Q13535	ATR	Serine/threonine-protein kinase ATR OS=Homo sapiens OX=9606 GN=ATR PE=1 SV=3 - [ATR_HUMAN]	Rare	0.136364	0.26401
P35542	SAA4	Serum amyloid A-4 protein OS=Homo sapiens OX=9606 GN=SAA4 PE=1 SV=2 - [SAA4_HUMAN]	Rare	0.136364	0.23877
Q16787	LAMA3	Laminin subunit alpha-3 OS=Homo sapiens OX=9606 GN=LAMA3 PE=1 SV=2 - [LAMA3_HUMAN]	Rare	0.136364	0.22282
O60281	ZNF292	Zinc finger protein 292 OS=Homo sapiens OX=9606 GN=ZNF292 PE=1 SV=3 - [ZN292_HUMAN]	Rare	0.136364	0.2161
Q9NRM6	IL17RB	Interleukin-17 receptor B OS=Homo sapiens OX=9606 GN=IL17RB PE=1 SV=2 - [I17RB_HUMAN]	Rare	0.136364	0.20371
Q5JSJ4	INTS6L	Integrator complex subunit 6-like OS=Homo sapiens OX=9606 GN=INTS6L PE=1 SV=1 - [INT6L_HUMAN]	Rare	0.136364	0.20351
Q9NYC9	DNAH9	Dynein heavy chain 9, axonemal OS=Homo sapiens OX=9606 GN=DNAH9 PE=1 SV=3 - [DYH9_HUMAN]	Rare	0.136364	0.20351
A0A0C4DH35	IGHV3-35	Probable non-functional immunoglobulin heavy variable 3-35 OS=Homo sapiens OX=9606 GN=IGHV3-35 PE=1 SV=1 - [HV335_HUMAN]	Rare	0.136364	0.20015
Q76NI1	KNDC1	Kinase non-catalytic C-lobe domain-containing protein 1 OS=Homo sapiens OX=9606 GN=KNDC1 PE=2 SV=2 - [KNDC1_HUMAN]	Rare	0.136364	0.19241
Q9NYQ7	CELSR3	Cadherin EGF LAG seven-pass G-type receptor 3 OS=Homo sapiens OX=9606 GN=CELSR3 PE=1 SV=2 - [CELR3_HUMAN]	Rare	0.136364	0.18802
Q15293	RCN1	Reticulocalbin-1 OS=Homo sapiens OX=9606 GN=RCN1 PE=1 SV=1 - [RCN1_HUMAN]	Rare	0.136364	0.18795
Q9Y4B4	RAD54L2	Helicase ARIP4 OS=Homo sapiens OX=9606 GN=RAD54L2 PE=1 SV=4 - [ARIP4_HUMAN]	Rare	0.136364	0.18769
P10599	TXN	Thioredoxin OS=Homo sapiens OX=9606 GN=TXN PE=1 SV=3 - [THIO_HUMAN]	Rare	0.136364	0.18653
Q9Y6D5	ARFGEF2	Brefeldin A-inhibited guanine nucleotide-exchange protein 2 OS=Homo sapiens OX=9606 GN=ARFGEF2 PE=1 SV=3 - [BIG2_HUMAN]	Rare	0.136364	0.1824
Q6XUX3	DSTYK	Dual serine/threonine and tyrosine protein kinase OS=Homo sapiens OX=9606 GN=DSTYK PE=1 SV=2 - [DUSTY_HUMAN]	Rare	0.136364	0.1802
Q5TBA9	FRY	Protein furry homolog OS=Homo sapiens OX=9606 GN=FRY PE=1 SV=1 - [FRY_HUMAN]	Rare	0.136364	0.17485
Q9Y618	NCOR2	Nuclear receptor corepressor 2 OS=Homo sapiens OX=9606 GN=NCOR2 PE=1 SV=3 - [NCOR2_HUMAN]	Rare	0.136364	0.16852
Q99551	MTERF1	Transcription termination factor 1, mitochondrial OS=Homo sapiens OX=9606 GN=MTERF1 PE=1 SV=1 - [MTEF1_HUMAN]	Rare	0.136364	0.15922
Q02224	CENPE	Centromere-associated protein E OS=Homo sapiens OX=9606 GN=CENPE PE=1 SV=2 - [CENPE_HUMAN]	Rare	0.136364	0.15709
Q96DM1	PGBD4	PiggyBac transposable element-derived protein 4 OS=Homo sapiens OX=9606 GN=PGBD4 PE=2 SV=3 - [PGBD4_HUMAN]	Rare	0.136364	0.15328
Q969Z3	MTARC2	Mitochondrial amidoxime reducing component 2 OS=Homo sapiens OX=9606 GN=MTARC2 PE=1 SV=1 - [MARC2_HUMAN]	Rare	0.136364	0.14895
Q9P2P1	NYNRIN	Protein NYNRIN OS=Homo sapiens OX=9606 GN=NYNRIN PE=2 SV=3 - [NYNRI_HUMAN]	Rare	0.136364	0.14728
Q9UKE5	TNIK	TRAF2 and NCK-interacting protein kinase OS=Homo sapiens OX=9606 GN=TNIK PE=1 SV=1 - [TNIK_HUMAN]	Rare	0.136364	0.14708
Q14517	FAT1	Protocadherin Fat 1 OS=Homo sapiens OX=9606 GN=FAT1 PE=1 SV=2 - [FAT1_HUMAN]	Rare	0.136364	0.14676
P13535	MYH8	Myosin-8 OS=Homo sapiens OX=9606 GN=MYH8 PE=1 SV=3 - [MYH8_HUMAN]	Rare	0.136364	0.14611
A9YTQ3	AHRR	Aryl hydrocarbon receptor repressor OS=Homo sapiens OX=9606 GN=AHRR PE=1 SV=3 - [AHRR_HUMAN]	Rare	0.136364	0.14088
Q96M29	TEKT5	Tektin-5 OS=Homo sapiens OX=9606 GN=TEKT5 PE=1 SV=1 - [TEKT5_HUMAN]	Rare	0.136364	0.13991
Q96JB1	DNAH8	Dynein heavy chain 8, axonemal OS=Homo sapiens OX=9606 GN=DNAH8 PE=1 SV=2 - [DYH8_HUMAN]	Rare	0.136364	0.13772
Q9UKL3	CASP8AP2	CASP8-associated protein 2 OS=Homo sapiens OX=9606 GN=CASP8AP2 PE=1 SV=1 - [C8AP2_HUMAN]	Rare	0.136364	0.13714
Q9NPR2	SEMA4B	Semaphorin-4B OS=Homo sapiens OX=9606 GN=SEMA4B PE=1 SV=4 - [SEM4B_HUMAN]	Rare	0.136364	0.13217
Q8N474	SFRP1	Secreted frizzled-related protein 1 OS=Homo sapiens OX=9606 GN=SFRP1 PE=1 SV=1 - [SFRP1_HUMAN]	Rare	0.136364	0.13191
Q9UBU6	FAM8A1	Protein FAM8A1 OS=Homo sapiens OX=9606 GN=FAM8A1 PE=1 SV=1 - [FA8A1_HUMAN]	Rare	0.136364	0.12745
A2RRP1	NBAS	Neuroblastoma-amplified sequence OS=Homo sapiens OX=9606 GN=NBAS PE=1 SV=2 - [NBAS_HUMAN]	Rare	0.136364	0.12668
Q9NZR2	LRP1B	Low-density lipoprotein receptor-related protein 1B OS=Homo sapiens OX=9606 GN=LRP1B PE=1 SV=2 - [LRP1B_HUMAN]	Rare	0.136364	0.1259
Q14152	EIF3A	Eukaryotic translation initiation factor 3 subunit A OS=Homo sapiens OX=9606 GN=EIF3A PE=1 SV=1 - [EIF3A_HUMAN]	Rare	0.136364	0.12487
Q99643	SDHC	Succinate dehydrogenase cytochrome b560 subunit, mitochondrial OS=Homo sapiens OX=9606 GN=SDHC PE=1 SV=1 - [C560_HUMAN]	Rare	0.136364	0.12138
Q8WXW3	PIBF1	Progesterone-induced-blocking factor 1 OS=Homo sapiens OX=9606 GN=PIBF1 PE=1 SV=2 - [PIBF1_HUMAN]	Rare	0.136364	0.11977
Q9GZM5	YIPF3	Protein YIPF3 OS=Homo sapiens OX=9606 GN=YIPF3 PE=1 SV=1 - [YIPF3_HUMAN]	Rare	0.136364	0.11777
P20936	RASA1	Ras GTPase-activating protein 1 OS=Homo sapiens OX=9606 GN=RASA1 PE=1 SV=1 - [RASA1_HUMAN]	Rare	0.136364	0.1157
P20933	AGA	N(4)-(beta-N-acetylglucosaminyl)-L-asparaginase OS=Homo sapiens OX=9606 GN=AGA PE=1 SV=2 - [ASPG_HUMAN]	Rare	0.136364	0.11428
P10253	GAA	Lysosomal alpha-glucosidase OS=Homo sapiens OX=9606 GN=GAA PE=1 SV=4 - [LYAG_HUMAN]	Rare	0.136364	0.1126
Q14563	SEMA3A	Semaphorin-3A OS=Homo sapiens OX=9606 GN=SEMA3A PE=1 SV=1 - [SEM3A_HUMAN]	Rare	0.136364	0.10699
Q9NZC9	SMARCAL1	SWI/SNF-related matrix-associated actin-dependent regulator of chromatin subfamily A-like protein 1 OS=Homo sapiens OX=9606 GN=SMARCAL1 PE=1 SV=1 - [SMAL1_HUMAN]	Rare	0.136364	0.10163
Q13275	SEMA3F	Semaphorin-3F OS=Homo sapiens OX=9606 GN=SEMA3F PE=2 SV=2 - [SEM3F_HUMAN]	Rare	0.136364	0.09246
O75503	CLN5	Ceroid-lipofuscinosis neuronal protein 5 OS=Homo sapiens OX=9606 GN=CLN5 PE=1 SV=2 - [CLN5_HUMAN]	Rare	0.136364	0.09175
Q7Z3V4	UBE3B	Ubiquitin-protein ligase E3B OS=Homo sapiens OX=9606 GN=UBE3B PE=1 SV=3 - [UBE3B_HUMAN]	Rare	0.125	1.453
P04433	IGKV3-11	Immunoglobulin kappa variable 3-11 OS=Homo sapiens OX=9606 GN=IGKV3-11 PE=1 SV=1 - [KV311_HUMAN]	Rare	0.125	0.93259
Q2KHR2	RFX7	DNA-binding protein RFX7 OS=Homo sapiens OX=9606 GN=RFX7 PE=1 SV=1 - [RFX7_HUMAN]	Rare	0.125	0.39256
Q14667	KIAA0100	Protein KIAA0100 OS=Homo sapiens OX=9606 GN=KIAA0100 PE=1 SV=3 - [K0100_HUMAN]	Rare	0.125	0.34698
Q6ZU52	KIAA0408	Uncharacterized protein KIAA0408 OS=Homo sapiens OX=9606 GN=KIAA0408 PE=1 SV=1 - [K0408_HUMAN]	Rare	0.125	0.25684
Q01668	CACNA1D	Voltage-dependent L-type calcium channel subunit alpha-1D OS=Homo sapiens OX=9606 GN=CACNA1D PE=1 SV=2 - [CAC1D_HUMAN]	Rare	0.125	0.24535
Q8TDG4	HELQ	Helicase POLQ-like OS=Homo sapiens OX=9606 GN=HELQ PE=1 SV=2 - [HELQ_HUMAN]	Rare	0.125	0.21068
P05549	TFAP2A	Transcription factor AP-2-alpha OS=Homo sapiens OX=9606 GN=TFAP2A PE=1 SV=1 - [AP2A_HUMAN]	Rare	0.125	0.20384
Q8IWZ6	BBS7	Bardet-Biedl syndrome 7 protein OS=Homo sapiens OX=9606 GN=BBS7 PE=1 SV=2 - [BBS7_HUMAN]	Rare	0.125	0.20048
Q12864	CDH17	Cadherin-17 OS=Homo sapiens OX=9606 GN=CDH17 PE=1 SV=3 - [CAD17_HUMAN]	Rare	0.125	0.1906
O95996	APC2	Adenomatous polyposis coli protein 2 OS=Homo sapiens OX=9606 GN=APC2 PE=1 SV=1 - [APCL_HUMAN]	Rare	0.125	0.18815
Q07954	LRP1	Prolow-density lipoprotein receptor-related protein 1 OS=Homo sapiens OX=9606 GN=LRP1 PE=1 SV=2 - [LRP1_HUMAN]	Rare	0.125	0.18143
Q6WRI0	IGSF10	Immunoglobulin superfamily member 10 OS=Homo sapiens OX=9606 GN=IGSF10 PE=1 SV=1 - [IGS10_HUMAN]	Rare	0.125	0.18104
Q9GZU5	NYX	Nyctalopin OS=Homo sapiens OX=9606 GN=NYX PE=1 SV=1 - [NYX_HUMAN]	Rare	0.125	0.17859
A0A0C4DH31	IGHV1-18	Immunoglobulin heavy variable 1-18 OS=Homo sapiens OX=9606 GN=IGHV1-18 PE=3 SV=1 - [HV118_HUMAN]	Rare	0.125	0.1691
Q9P1Z2	CALCOCO1	Calcium-binding and coiled-coil domain-containing protein 1 OS=Homo sapiens OX=9606 GN=CALCOCO1 PE=1 SV=2 - [CACO1_HUMAN]	Rare	0.125	0.16826
P09972	ALDOC	Fructose-bisphosphate aldolase C OS=Homo sapiens OX=9606 GN=ALDOC PE=1 SV=2 - [ALDOC_HUMAN]	Rare	0.125	0.16574
O15195	VILL	Villin-like protein OS=Homo sapiens OX=9606 GN=VILL PE=2 SV=3 - [VILL_HUMAN]	Rare	0.125	0.16368
Q9NZ56	FMN2	Formin-2 OS=Homo sapiens OX=9606 GN=FMN2 PE=1 SV=4 - [FMN2_HUMAN]	Rare	0.125	0.15418
Q13790	APOF	Apolipoprotein F OS=Homo sapiens OX=9606 GN=APOF PE=1 SV=2 - [APOF_HUMAN]	Rare	0.125	0.14992
Q9Y217	MTMR6	Myotubularin-related protein 6 OS=Homo sapiens OX=9606 GN=MTMR6 PE=1 SV=3 - [MTMR6_HUMAN]	Rare	0.125	0.14431
Q17RC7	EXOC3L4	Exocyst complex component 3-like protein 4 OS=Homo sapiens OX=9606 GN=EXOC3L4 PE=1 SV=2 - [EX3L4_HUMAN]	Rare	0.125	0.14172
P13611	VCAN	Versican core protein OS=Homo sapiens OX=9606 GN=VCAN PE=1 SV=3 - [CSPG2_HUMAN]	Rare	0.125	0.14153
Q2TAZ0	ATG2A	Autophagy-related protein 2 homolog A OS=Homo sapiens OX=9606 GN=ATG2A PE=1 SV=3 - [ATG2A_HUMAN]	Rare	0.125	0.13998
O60658	PDE8A	High affinity cAMP-specific and IBMX-insensitive 3',5'-cyclic phosphodiesterase 8A OS=Homo sapiens OX=9606 GN=PDE8A PE=1 SV=2 - [PDE8A_HUMAN]	Rare	0.125	0.13759
P20396	TRH	Pro-thyrotropin-releasing hormone OS=Homo sapiens OX=9606 GN=TRH PE=1 SV=1 - [TRH_HUMAN]	Rare	0.125	0.13262
P29074	PTPN4	Tyrosine-protein phosphatase non-receptor type 4 OS=Homo sapiens OX=9606 GN=PTPN4 PE=1 SV=1 - [PTN4_HUMAN]	Rare	0.125	0.13023
Q8TDX9	PKD1L1	Polycystic kidney disease protein 1-like 1 OS=Homo sapiens OX=9606 GN=PKD1L1 PE=1 SV=1 - [PK1L1_HUMAN]	Rare	0.125	0.12965
Q9H4A9	DPEP2	Dipeptidase 2 OS=Homo sapiens OX=9606 GN=DPEP2 PE=1 SV=3 - [DPEP2_HUMAN]	Rare	0.125	0.12965
Q86Y25	ZNF354C	Zinc finger protein 354C OS=Homo sapiens OX=9606 GN=ZNF354C PE=1 SV=1 - [Z354C_HUMAN]	Rare	0.125	0.12829
P17643	TYRP1	5,6-dihydroxyindole-2-carboxylic acid oxidase OS=Homo sapiens OX=9606 GN=TYRP1 PE=1 SV=2 - [TYRP1_HUMAN]	Rare	0.125	0.12532
Q8N720	ZNF655	Zinc finger protein 655 OS=Homo sapiens OX=9606 GN=ZNF655 PE=1 SV=3 - [ZN655_HUMAN]	Rare	0.125	0.12113
Q92616	GCN1	eIF-2-alpha kinase activator GCN1 OS=Homo sapiens OX=9606 GN=GCN1 PE=1 SV=6 - [GCN1_HUMAN]	Rare	0.125	0.11971
Q8N1P7	CRYBG2	Beta/gamma crystallin domain-containing protein 2 OS=Homo sapiens OX=9606 GN=CRYBG2 PE=2 SV=2 - [CRBG2_HUMAN]	Rare	0.125	0.11176
P26927	MST1	Hepatocyte growth factor-like protein OS=Homo sapiens OX=9606 GN=MST1 PE=1 SV=2 - [HGFL_HUMAN]	Rare	0.125	0.10724
Q12907	LMAN2	Vesicular integral-membrane protein VIP36 OS=Homo sapiens OX=9606 GN=LMAN2 PE=1 SV=1 - [LMAN2_HUMAN]	Rare	0.125	0.10595
Q86XA9	HEATR5A	HEAT repeat-containing protein 5A OS=Homo sapiens OX=9606 GN=HEATR5A PE=1 SV=2 - [HTR5A_HUMAN]	Rare	0.125	0.10279
Q8NHY0	B4GALNT2	Beta-1,4 N-acetylgalactosaminyltransferase 2 OS=Homo sapiens OX=9606 GN=B4GALNT2 PE=1 SV=2 - [B4GN2_HUMAN]	Rare	0.125	0.10176
Q6P2Q9	PRPF8	Pre-mRNA-processing-splicing factor 8 OS=Homo sapiens OX=9606 GN=PRPF8 PE=1 SV=2 - [PRP8_HUMAN]	Rare	0.125	0.1015
O43314	PPIP5K2	Inositol hexakisphosphate and diphosphoinositol-pentakisphosphate kinase 2 OS=Homo sapiens OX=9606 GN=PPIP5K2 PE=1 SV=3 - [VIP2_HUMAN]	Rare	0.125	0.08716
Q04695	KRT17	Keratin, type I cytoskeletal 17 OS=Homo sapiens OX=9606 GN=KRT17 PE=1 SV=2 - [K1C17_HUMAN]	Rare	0.113636	3.94396
P01877	IGHA2	Immunoglobulin heavy constant alpha 2 OS=Homo sapiens OX=9606 GN=IGHA2 PE=1 SV=4 - [IGHA2_HUMAN]	Rare	0.113636	2.02034
P78562	PHEX	Phosphate-regulating neutral endopeptidase PHEX OS=Homo sapiens OX=9606 GN=PHEX PE=1 SV=1 - [PHEX_HUMAN]	Rare	0.113636	0.834
Q9P2P6	STARD9	StAR-related lipid transfer protein 9 OS=Homo sapiens OX=9606 GN=STARD9 PE=1 SV=3 - [STAR9_HUMAN]	Rare	0.113636	0.38339
Q17RG1	KCTD19	BTB/POZ domain-containing protein KCTD19 OS=Homo sapiens OX=9606 GN=KCTD19 PE=1 SV=1 - [KCD19_HUMAN]	Rare	0.113636	0.25103
Q13231	CHIT1	Chitotriosidase-1 OS=Homo sapiens OX=9606 GN=CHIT1 PE=1 SV=1 - [CHIT1_HUMAN]	Rare	0.113636	0.23231
Q8IXW5	RPAP2	Putative RNA polymerase II subunit B1 CTD phosphatase RPAP2 OS=Homo sapiens OX=9606 GN=RPAP2 PE=1 SV=1 - [RPAP2_HUMAN]	Rare	0.113636	0.20932
P04075	ALDOA	Fructose-bisphosphate aldolase A OS=Homo sapiens OX=9606 GN=ALDOA PE=1 SV=2 - [ALDOA_HUMAN]	Rare	0.113636	0.20442
Q9H7P9	PLEKHG2	Pleckstrin homology domain-containing family G member 2 OS=Homo sapiens OX=9606 GN=PLEKHG2 PE=1 SV=3 - [PKHG2_HUMAN]	Rare	0.113636	0.19641
Q93009	USP7	Ubiquitin carboxyl-terminal hydrolase 7 OS=Homo sapiens OX=9606 GN=USP7 PE=1 SV=2 - [UBP7_HUMAN]	Rare	0.113636	0.1895
P53370	NUDT6	Nucleoside diphosphate-linked moiety X motif 6 OS=Homo sapiens OX=9606 GN=NUDT6 PE=1 SV=2 - [NUDT6_HUMAN]	Rare	0.113636	0.18853
P01130	LDLR	Low-density lipoprotein receptor OS=Homo sapiens OX=9606 GN=LDLR PE=1 SV=1 - [LDLR_HUMAN]	Rare	0.113636	0.18279
P51587	BRCA2	Breast cancer type 2 susceptibility protein OS=Homo sapiens OX=9606 GN=BRCA2 PE=1 SV=3 - [BRCA2_HUMAN]	Rare	0.113636	0.18195
P01742	IGHV1-69	Immunoglobulin heavy variable 1-69 OS=Homo sapiens OX=9606 GN=IGHV1-69 PE=1 SV=2 - [HV169_HUMAN]	Rare	0.113636	0.1804
Q9UI17	DMGDH	Dimethylglycine dehydrogenase, mitochondrial OS=Homo sapiens OX=9606 GN=DMGDH PE=1 SV=2 - [M2GD_HUMAN]	Rare	0.113636	0.17478
Q9Y597	KCTD3	BTB/POZ domain-containing protein KCTD3 OS=Homo sapiens OX=9606 GN=KCTD3 PE=1 SV=2 - [KCTD3_HUMAN]	Rare	0.113636	0.16774
Q8WXG9	ADGRV1	Adhesion G-protein coupled receptor V1 OS=Homo sapiens OX=9606 GN=ADGRV1 PE=1 SV=2 - [AGRV1_HUMAN]	Rare	0.113636	0.16703
Q8IZA0	KIAA0319L	Dyslexia-associated protein KIAA0319-like protein OS=Homo sapiens OX=9606 GN=KIAA0319L PE=1 SV=2 - [K319L_HUMAN]	Rare	0.113636	0.1669
Q9ULU8	CADPS	Calcium-dependent secretion activator 1 OS=Homo sapiens OX=9606 GN=CADPS PE=1 SV=3 - [CAPS1_HUMAN]	Rare	0.113636	0.16413
Q8NEK8	TENT5D	Terminal nucleotidyltransferase 5D OS=Homo sapiens OX=9606 GN=TENT5D PE=1 SV=1 - [TET5D_HUMAN]	Rare	0.113636	0.16083
Q9UPM8	AP4E1	AP-4 complex subunit epsilon-1 OS=Homo sapiens OX=9606 GN=AP4E1 PE=1 SV=2 - [AP4E1_HUMAN]	Rare	0.113636	0.15812
Q8N392	ARHGAP18	Rho GTPase-activating protein 18 OS=Homo sapiens OX=9606 GN=ARHGAP18 PE=1 SV=3 - [RHG18_HUMAN]	Rare	0.113636	0.15619
Q9BYK8	HELZ2	Helicase with zinc finger domain 2 OS=Homo sapiens OX=9606 GN=HELZ2 PE=1 SV=6 - [HELZ2_HUMAN]	Rare	0.113636	0.14928
Q5H913	ARL13A	ADP-ribosylation factor-like protein 13A OS=Homo sapiens OX=9606 GN=ARL13A PE=2 SV=2 - [AR13A_HUMAN]	Rare	0.113636	0.14695
Q9C0G6	DNAH6	Dynein heavy chain 6, axonemal OS=Homo sapiens OX=9606 GN=DNAH6 PE=2 SV=3 - [DYH6_HUMAN]	Rare	0.113636	0.14592
Q9BU64	CENPO	Centromere protein O OS=Homo sapiens OX=9606 GN=CENPO PE=1 SV=1 - [CENPO_HUMAN]	Rare	0.113636	0.14495
Q13332	PTPRS	Receptor-type tyrosine-protein phosphatase S OS=Homo sapiens OX=9606 GN=PTPRS PE=1 SV=3 - [PTPRS_HUMAN]	Rare	0.113636	0.1445
Q6ZS81	WDFY4	WD repeat- and FYVE domain-containing protein 4 OS=Homo sapiens OX=9606 GN=WDFY4 PE=1 SV=3 - [WDFY4_HUMAN]	Rare	0.113636	0.1434
O14786	NRP1	Neuropilin-1 OS=Homo sapiens OX=9606 GN=NRP1 PE=1 SV=3 - [NRP1_HUMAN]	Rare	0.113636	0.14237
Q9Y620	RAD54B	DNA repair and recombination protein RAD54B OS=Homo sapiens OX=9606 GN=RAD54B PE=1 SV=1 - [RA54B_HUMAN]	Rare	0.113636	0.14043
P42704	LRPPRC	Leucine-rich PPR motif-containing protein, mitochondrial OS=Homo sapiens OX=9606 GN=LRPPRC PE=1 SV=3 - [LPPRC_HUMAN]	Rare	0.113636	0.13843
Q15878	CACNA1E	Voltage-dependent R-type calcium channel subunit alpha-1E OS=Homo sapiens OX=9606 GN=CACNA1E PE=1 SV=3 - [CAC1E_HUMAN]	Rare	0.113636	0.13785
P08174	CD55	Complement decay-accelerating factor OS=Homo sapiens OX=9606 GN=CD55 PE=1 SV=4 - [DAF_HUMAN]	Rare	0.113636	0.13759
Q96MU7	YTHDC1	YTH domain-containing protein 1 OS=Homo sapiens OX=9606 GN=YTHDC1 PE=1 SV=3 - [YTDC1_HUMAN]	Rare	0.113636	0.13753
Q8NET4	RTL9	Retrotransposon Gag-like protein 9 OS=Homo sapiens OX=9606 GN=RTL9 PE=1 SV=1 - [RTL9_HUMAN]	Rare	0.113636	0.13656
Q9P217	ZSWIM5	Zinc finger SWIM domain-containing protein 5 OS=Homo sapiens OX=9606 GN=ZSWIM5 PE=2 SV=2 - [ZSWM5_HUMAN]	Rare	0.113636	0.13604
Q7Z5K2	WAPL	Wings apart-like protein homolog OS=Homo sapiens OX=9606 GN=WAPL PE=1 SV=1 - [WAPL_HUMAN]	Rare	0.113636	0.13417
P56192	MARS1	Methionine--tRNA ligase, cytoplasmic OS=Homo sapiens OX=9606 GN=MARS1 PE=1 SV=2 - [SYMC_HUMAN]	Rare	0.113636	0.1341
O76061	STC2	Stanniocalcin-2 OS=Homo sapiens OX=9606 GN=STC2 PE=1 SV=1 - [STC2_HUMAN]	Rare	0.113636	0.13391
P40763	STAT3	Signal transducer and activator of transcription 3 OS=Homo sapiens OX=9606 GN=STAT3 PE=1 SV=2 - [STAT3_HUMAN]	Rare	0.113636	0.13326
Q8NF91	SYNE1	Nesprin-1 OS=Homo sapiens OX=9606 GN=SYNE1 PE=1 SV=4 - [SYNE1_HUMAN]	Rare	0.113636	0.13217
Q12923	PTPN13	Tyrosine-protein phosphatase non-receptor type 13 OS=Homo sapiens OX=9606 GN=PTPN13 PE=1 SV=2 - [PTN13_HUMAN]	Rare	0.113636	0.13152
Q9NZJ4	SACS	Sacsin OS=Homo sapiens OX=9606 GN=SACS PE=1 SV=2 - [SACS_HUMAN]	Rare	0.113636	0.1312
Q5VYK3	ECPAS	Proteasome adapter and scaffold protein ECM29 OS=Homo sapiens OX=9606 GN=ECPAS PE=1 SV=2 - [ECM29_HUMAN]	Rare	0.113636	0.13113
Q7LBC6	KDM3B	Lysine-specific demethylase 3B OS=Homo sapiens OX=9606 GN=KDM3B PE=1 SV=2 - [KDM3B_HUMAN]	Rare	0.113636	0.12836
Q8NG31	KNL1	Kinetochore scaffold 1 OS=Homo sapiens OX=9606 GN=KNL1 PE=1 SV=3 - [KNL1_HUMAN]	Rare	0.113636	0.12823
O95631	NTN1	Netrin-1 OS=Homo sapiens OX=9606 GN=NTN1 PE=1 SV=2 - [NET1_HUMAN]	Rare	0.113636	0.1281
Q9P2S6	ANKMY1	Ankyrin repeat and MYND domain-containing protein 1 OS=Homo sapiens OX=9606 GN=ANKMY1 PE=2 SV=2 - [ANKY1_HUMAN]	Rare	0.113636	0.12552
Q8IZF6	ADGRG4	Adhesion G-protein coupled receptor G4 OS=Homo sapiens OX=9606 GN=ADGRG4 PE=2 SV=2 - [AGRG4_HUMAN]	Rare	0.113636	0.12519
Q9Y4D8	HECTD4	Probable E3 ubiquitin-protein ligase HECTD4 OS=Homo sapiens OX=9606 GN=HECTD4 PE=1 SV=5 - [HECD4_HUMAN]	Rare	0.113636	0.12474
P05166	PCCB	Propionyl-CoA carboxylase beta chain, mitochondrial OS=Homo sapiens OX=9606 GN=PCCB PE=1 SV=3 - [PCCB_HUMAN]	Rare	0.113636	0.12061
Q92752	TNR	Tenascin-R OS=Homo sapiens OX=9606 GN=TNR PE=1 SV=3 - [TENR_HUMAN]	Rare	0.113636	0.11958
O60423	ATP8B3	Phospholipid-transporting ATPase IK OS=Homo sapiens OX=9606 GN=ATP8B3 PE=2 SV=4 - [AT8B3_HUMAN]	Rare	0.113636	0.119
Q96BA8	CREB3L1	Cyclic AMP-responsive element-binding protein 3-like protein 1 OS=Homo sapiens OX=9606 GN=CREB3L1 PE=1 SV=1 - [CR3L1_HUMAN]	Rare	0.113636	0.11829
Q969V5	MUL1	Mitochondrial ubiquitin ligase activator of NFKB 1 OS=Homo sapiens OX=9606 GN=MUL1 PE=1 SV=1 - [MUL1_HUMAN]	Rare	0.113636	0.11796
P51606	RENBP	N-acylglucosamine 2-epimerase OS=Homo sapiens OX=9606 GN=RENBP PE=1 SV=2 - [RENBP_HUMAN]	Rare	0.113636	0.11712
Q8TD31	CCHCR1	Coiled-coil alpha-helical rod protein 1 OS=Homo sapiens OX=9606 GN=CCHCR1 PE=1 SV=2 - [CCHCR_HUMAN]	Rare	0.113636	0.1168
O43638	FOXS1	Forkhead box protein S1 OS=Homo sapiens OX=9606 GN=FOXS1 PE=2 SV=2 - [FOXS1_HUMAN]	Rare	0.113636	0.11525
Q96IR7	HPDL	4-hydroxyphenylpyruvate dioxygenase-like protein OS=Homo sapiens OX=9606 GN=HPDL PE=1 SV=1 - [HPDL_HUMAN]	Rare	0.113636	0.11519
O00192	ARVCF	Armadillo repeat protein deleted in velo-cardio-facial syndrome OS=Homo sapiens OX=9606 GN=ARVCF PE=1 SV=1 - [ARVC_HUMAN]	Rare	0.113636	0.11499
Q92608	DOCK2	Dedicator of cytokinesis protein 2 OS=Homo sapiens OX=9606 GN=DOCK2 PE=1 SV=2 - [DOCK2_HUMAN]	Rare	0.113636	0.1126
P0DPH7	TUBA3C	Tubulin alpha-3C chain OS=Homo sapiens OX=9606 GN=TUBA3C PE=1 SV=1 - [TBA3C_HUMAN]	Rare	0.113636	0.1108
Q15029	EFTUD2	116 kDa U5 small nuclear ribonucleoprotein component OS=Homo sapiens OX=9606 GN=EFTUD2 PE=1 SV=1 - [U5S1_HUMAN]	Rare	0.113636	0.10757
Q9Y2C2	UST	Uronyl 2-sulfotransferase OS=Homo sapiens OX=9606 GN=UST PE=2 SV=1 - [UST_HUMAN]	Rare	0.113636	0.10686
Q8WXX0	DNAH7	Dynein heavy chain 7, axonemal OS=Homo sapiens OX=9606 GN=DNAH7 PE=1 SV=2 - [DYH7_HUMAN]	Rare	0.113636	0.10563
Q8TDR2	STK35	Serine/threonine-protein kinase 35 OS=Homo sapiens OX=9606 GN=STK35 PE=1 SV=2 - [STK35_HUMAN]	Rare	0.113636	0.10382
Q96Q15	SMG1	Serine/threonine-protein kinase SMG1 OS=Homo sapiens OX=9606 GN=SMG1 PE=1 SV=3 - [SMG1_HUMAN]	Rare	0.113636	0.10285
Q96MY7	FAM161B	Protein FAM161B OS=Homo sapiens OX=9606 GN=FAM161B PE=1 SV=2 - [F161B_HUMAN]	Rare	0.113636	0.10221
Q5T3I0	GPATCH4	G patch domain-containing protein 4 OS=Homo sapiens OX=9606 GN=GPATCH4 PE=1 SV=2 - [GPTC4_HUMAN]	Rare	0.113636	0.10214
O60882	MMP20	Matrix metalloproteinase-20 OS=Homo sapiens OX=9606 GN=MMP20 PE=1 SV=3 - [MMP20_HUMAN]	Rare	0.113636	0.0995
Q02809	PLOD1	Procollagen-lysine,2-oxoglutarate 5-dioxygenase 1 OS=Homo sapiens OX=9606 GN=PLOD1 PE=1 SV=2 - [PLOD1_HUMAN]	Rare	0.113636	0.09859
Q8NFD5	ARID1B	AT-rich interactive domain-containing protein 1B OS=Homo sapiens OX=9606 GN=ARID1B PE=1 SV=2 - [ARI1B_HUMAN]	Rare	0.113636	0.09756
Q9UMR5	PPT2	Lysosomal thioesterase PPT2 OS=Homo sapiens OX=9606 GN=PPT2 PE=1 SV=4 - [PPT2_HUMAN]	Rare	0.113636	0.09698
Q14956	GPNMB	Transmembrane glycoprotein NMB OS=Homo sapiens OX=9606 GN=GPNMB PE=1 SV=2 - [GPNMB_HUMAN]	Rare	0.113636	0.09452
O43432	EIF4G3	Eukaryotic translation initiation factor 4 gamma 3 OS=Homo sapiens OX=9606 GN=EIF4G3 PE=1 SV=2 - [IF4G3_HUMAN]	Rare	0.113636	0.08716
P07355	ANXA2	Annexin A2 OS=Homo sapiens OX=9606 GN=ANXA2 PE=1 SV=2 - [ANXA2_HUMAN]	Rare	0.102273	0.39443
Q08554	DSC1	Desmocollin-1 OS=Homo sapiens OX=9606 GN=DSC1 PE=1 SV=2 - [DSC1_HUMAN]	Rare	0.102273	0.31495
P48454	PPP3CC	Serine/threonine-protein phosphatase 2B catalytic subunit gamma isoform OS=Homo sapiens OX=9606 GN=PPP3CC PE=1 SV=3 - [PP2BC_HUMAN]	Rare	0.102273	0.29281
Q5DID0	UMODL1	Uromodulin-like 1 OS=Homo sapiens OX=9606 GN=UMODL1 PE=2 SV=2 - [UROL1_HUMAN]	Rare	0.102273	0.25542
Q8IZ02	LRRC34	Leucine-rich repeat-containing protein 34 OS=Homo sapiens OX=9606 GN=LRRC34 PE=2 SV=3 - [LRC34_HUMAN]	Rare	0.102273	0.25103
P68104	EEF1A1	Elongation factor 1-alpha 1 OS=Homo sapiens OX=9606 GN=EEF1A1 PE=1 SV=1 - [EF1A1_HUMAN]	Rare	0.102273	0.25013
Q8WZ60	KLHL6	Kelch-like protein 6 OS=Homo sapiens OX=9606 GN=KLHL6 PE=1 SV=3 - [KLHL6_HUMAN]	Rare	0.102273	0.22159
P62258	YWHAE	14-3-3 protein epsilon OS=Homo sapiens OX=9606 GN=YWHAE PE=1 SV=1 - [1433E_HUMAN]	Rare	0.102273	0.20816
P55265	ADAR	Double-stranded RNA-specific adenosine deaminase OS=Homo sapiens OX=9606 GN=ADAR PE=1 SV=4 - [DSRAD_HUMAN]	Rare	0.102273	0.17562
P85299	PRR5	Proline-rich protein 5 OS=Homo sapiens OX=9606 GN=PRR5 PE=1 SV=1 - [PRR5_HUMAN]	Rare	0.102273	0.17491
Q5VSP4	LCN1P1	Putative lipocalin 1-like protein 1 OS=Homo sapiens OX=9606 GN=LCN1P1 PE=5 SV=1 - [LC1L1_HUMAN]	Rare	0.102273	0.17485
Q8NG66	NEK11	Serine/threonine-protein kinase Nek11 OS=Homo sapiens OX=9606 GN=NEK11 PE=1 SV=2 - [NEK11_HUMAN]	Rare	0.102273	0.17413
P35520	CBS	Cystathionine beta-synthase OS=Homo sapiens OX=9606 GN=CBS PE=1 SV=2 - [CBS_HUMAN]	Rare	0.102273	0.17336
Q96DN5	TBC1D31	TBC1 domain family member 31 OS=Homo sapiens OX=9606 GN=TBC1D31 PE=1 SV=2 - [TBC31_HUMAN]	Rare	0.102273	0.16819
Q15751	HERC1	Probable E3 ubiquitin-protein ligase HERC1 OS=Homo sapiens OX=9606 GN=HERC1 PE=1 SV=2 - [HERC1_HUMAN]	Rare	0.102273	0.1629
Q7RTY7	OVCH1	Ovochymase-1 OS=Homo sapiens OX=9606 GN=OVCH1 PE=2 SV=2 - [OVCH1_HUMAN]	Rare	0.102273	0.16225
A6NNM8	TTLL13P	Tubulin polyglutamylase TTLL13P OS=Homo sapiens OX=9606 GN=TTLL13P PE=1 SV=2 - [TTL13_HUMAN]	Rare	0.102273	0.15999
Q56UQ5		TPT1-like protein OS=Homo sapiens OX=9606 PE=2 SV=2 - [TPT1L_HUMAN]	Rare	0.102273	0.15438
Q9Y6V0	PCLO	Protein piccolo OS=Homo sapiens OX=9606 GN=PCLO PE=1 SV=5 - [PCLO_HUMAN]	Rare	0.102273	0.15438
P46821	MAP1B	Microtubule-associated protein 1B OS=Homo sapiens OX=9606 GN=MAP1B PE=1 SV=2 - [MAP1B_HUMAN]	Rare	0.102273	0.15431
Q7Z7M0	MEGF8	Multiple epidermal growth factor-like domains protein 8 OS=Homo sapiens OX=9606 GN=MEGF8 PE=1 SV=2 - [MEGF8_HUMAN]	Rare	0.102273	0.15205
Q04671	OCA2	P protein OS=Homo sapiens OX=9606 GN=OCA2 PE=1 SV=2 - [P_HUMAN]	Rare	0.102273	0.14482
P98161	PKD1	Polycystin-1 OS=Homo sapiens OX=9606 GN=PKD1 PE=1 SV=3 - [PKD1_HUMAN]	Rare	0.102273	0.14347
Q8N1F7	NUP93	Nuclear pore complex protein Nup93 OS=Homo sapiens OX=9606 GN=NUP93 PE=1 SV=2 - [NUP93_HUMAN]	Rare	0.102273	0.14205
Q9NR19	ACSS2	Acetyl-coenzyme A synthetase, cytoplasmic OS=Homo sapiens OX=9606 GN=ACSS2 PE=1 SV=1 - [ACSA_HUMAN]	Rare	0.102273	0.13991
Q8IVT5	KSR1	Kinase suppressor of Ras 1 OS=Homo sapiens OX=9606 GN=KSR1 PE=1 SV=3 - [KSR1_HUMAN]	Rare	0.102273	0.13171
Q9NP73	ALG13	Putative bifunctional UDP-N-acetylglucosamine transferase and deubiquitinase ALG13 OS=Homo sapiens OX=9606 GN=ALG13 PE=1 SV=2 - [ALG13_HUMAN]	Rare	0.102273	0.13017
Q6PI26	SHQ1	Protein SHQ1 homolog OS=Homo sapiens OX=9606 GN=SHQ1 PE=1 SV=2 - [SHQ1_HUMAN]	Rare	0.102273	0.12765
Q9UN70	PCDHGC3	Protocadherin gamma-C3 OS=Homo sapiens OX=9606 GN=PCDHGC3 PE=1 SV=1 - [PCDGK_HUMAN]	Rare	0.102273	0.12519
Q9NQT8	KIF13B	Kinesin-like protein KIF13B OS=Homo sapiens OX=9606 GN=KIF13B PE=1 SV=2 - [KI13B_HUMAN]	Rare	0.102273	0.12474
P36269	GGT5	Glutathione hydrolase 5 proenzyme OS=Homo sapiens OX=9606 GN=GGT5 PE=1 SV=2 - [GGT5_HUMAN]	Rare	0.102273	0.12371
Q9NZI8	IGF2BP1	Insulin-like growth factor 2 mRNA-binding protein 1 OS=Homo sapiens OX=9606 GN=IGF2BP1 PE=1 SV=2 - [IF2B1_HUMAN]	Rare	0.102273	0.12306
Q8NI08	NCOA7	Nuclear receptor coactivator 7 OS=Homo sapiens OX=9606 GN=NCOA7 PE=1 SV=2 - [NCOA7_HUMAN]	Rare	0.102273	0.12255
Q9NYU1	UGGT2	UDP-glucose:glycoprotein glucosyltransferase 2 OS=Homo sapiens OX=9606 GN=UGGT2 PE=1 SV=4 - [UGGG2_HUMAN]	Rare	0.102273	0.12235
P10721	KIT	Mast/stem cell growth factor receptor Kit OS=Homo sapiens OX=9606 GN=KIT PE=1 SV=1 - [KIT_HUMAN]	Rare	0.102273	0.12197
Q99973	TEP1	Telomerase protein component 1 OS=Homo sapiens OX=9606 GN=TEP1 PE=1 SV=2 - [TEP1_HUMAN]	Rare	0.102273	0.12151
O94964	SOGA1	Protein SOGA1 OS=Homo sapiens OX=9606 GN=SOGA1 PE=1 SV=2 - [SOGA1_HUMAN]	Rare	0.102273	0.11867
Q8IZD2	KMT2E	Inactive histone-lysine N-methyltransferase 2E OS=Homo sapiens OX=9606 GN=KMT2E PE=1 SV=1 - [KMT2E_HUMAN]	Rare	0.102273	0.11757
Q9Y2H9	MAST1	Microtubule-associated serine/threonine-protein kinase 1 OS=Homo sapiens OX=9606 GN=MAST1 PE=1 SV=2 - [MAST1_HUMAN]	Rare	0.102273	0.11693
Q9BSJ5	C17orf80	Uncharacterized protein C17orf80 OS=Homo sapiens OX=9606 GN=C17orf80 PE=2 SV=2 - [CQ080_HUMAN]	Rare	0.102273	0.11661
Q63HN8	RNF213	E3 ubiquitin-protein ligase RNF213 OS=Homo sapiens OX=9606 GN=RNF213 PE=1 SV=3 - [RN213_HUMAN]	Rare	0.102273	0.11609
Q8IWI9	MGA	MAX gene-associated protein OS=Homo sapiens OX=9606 GN=MGA PE=1 SV=4 - [MGAP_HUMAN]	Rare	0.102273	0.1159
Q9C0G0	ZNF407	Zinc finger protein 407 OS=Homo sapiens OX=9606 GN=ZNF407 PE=1 SV=2 - [ZN407_HUMAN]	Rare	0.102273	0.11525
Q6ZV73	FGD6	FYVE, RhoGEF and PH domain-containing protein 6 OS=Homo sapiens OX=9606 GN=FGD6 PE=1 SV=2 - [FGD6_HUMAN]	Rare	0.102273	0.11467
Q96HF1	SFRP2	Secreted frizzled-related protein 2 OS=Homo sapiens OX=9606 GN=SFRP2 PE=1 SV=2 - [SFRP2_HUMAN]	Rare	0.102273	0.11299
Q9Y4B5	MTCL1	Microtubule cross-linking factor 1 OS=Homo sapiens OX=9606 GN=MTCL1 PE=1 SV=5 - [MTCL1_HUMAN]	Rare	0.102273	0.11163
P01591	JCHAIN	Immunoglobulin J chain OS=Homo sapiens OX=9606 GN=JCHAIN PE=1 SV=4 - [IGJ_HUMAN]	Rare	0.102273	0.11118
Q8IXR9	C12orf56	Uncharacterized protein C12orf56 OS=Homo sapiens OX=9606 GN=C12orf56 PE=2 SV=3 - [CL056_HUMAN]	Rare	0.102273	0.11086
Q92854	SEMA4D	Semaphorin-4D OS=Homo sapiens OX=9606 GN=SEMA4D PE=1 SV=1 - [SEM4D_HUMAN]	Rare	0.102273	0.1108
Q6PJT7	ZC3H14	Zinc finger CCCH domain-containing protein 14 OS=Homo sapiens OX=9606 GN=ZC3H14 PE=1 SV=1 - [ZC3HE_HUMAN]	Rare	0.102273	0.10996
Q9NZ94	NLGN3	Neuroligin-3 OS=Homo sapiens OX=9606 GN=NLGN3 PE=1 SV=2 - [NLGN3_HUMAN]	Rare	0.102273	0.10989
Q7Z6Z7	HUWE1	E3 ubiquitin-protein ligase HUWE1 OS=Homo sapiens OX=9606 GN=HUWE1 PE=1 SV=3 - [HUWE1_HUMAN]	Rare	0.102273	0.10925
P28331	NDUFS1	NADH-ubiquinone oxidoreductase 75 kDa subunit, mitochondrial OS=Homo sapiens OX=9606 GN=NDUFS1 PE=1 SV=3 - [NDUS1_HUMAN]	Rare	0.102273	0.10828
Q7Z3U7	MON2	Protein MON2 homolog OS=Homo sapiens OX=9606 GN=MON2 PE=1 SV=3 - [MON2_HUMAN]	Rare	0.102273	0.10537
Q4UJ75	ANKRD20A4P	Putative ankyrin repeat domain-containing protein 20A4 OS=Homo sapiens OX=9606 GN=ANKRD20A4P PE=5 SV=1 - [A20A4_HUMAN]	Rare	0.102273	0.10518
Q15013	MAD2L1BP	MAD2L1-binding protein OS=Homo sapiens OX=9606 GN=MAD2L1BP PE=1 SV=1 - [MD2BP_HUMAN]	Rare	0.102273	0.10466
Q9H336	CRISPLD1	Cysteine-rich secretory protein LCCL domain-containing 1 OS=Homo sapiens OX=9606 GN=CRISPLD1 PE=2 SV=1 - [CRLD1_HUMAN]	Rare	0.102273	0.10402
P08F94	PKHD1	Fibrocystin OS=Homo sapiens OX=9606 GN=PKHD1 PE=1 SV=1 - [PKHD1_HUMAN]	Rare	0.102273	0.1035
O14744	PRMT5	Protein arginine N-methyltransferase 5 OS=Homo sapiens OX=9606 GN=PRMT5 PE=1 SV=4 - [ANM5_HUMAN]	Rare	0.102273	0.10324
Q6V0I7	FAT4	Protocadherin Fat 4 OS=Homo sapiens OX=9606 GN=FAT4 PE=1 SV=2 - [FAT4_HUMAN]	Rare	0.102273	0.10272
Q5JPI3	C3orf38	Uncharacterized protein C3orf38 OS=Homo sapiens OX=9606 GN=C3orf38 PE=1 SV=1 - [CC038_HUMAN]	Rare	0.102273	0.10111
P05997	COL5A2	Collagen alpha-2(V) chain OS=Homo sapiens OX=9606 GN=COL5A2 PE=1 SV=3 - [CO5A2_HUMAN]	Rare	0.102273	0.10008
Q7Z745	MROH2B	Maestro heat-like repeat-containing protein family member 2B OS=Homo sapiens OX=9606 GN=MROH2B PE=2 SV=3 - [MRO2B_HUMAN]	Rare	0.102273	0.10001
Q8NEZ4	KMT2C	Histone-lysine N-methyltransferase 2C OS=Homo sapiens OX=9606 GN=KMT2C PE=1 SV=3 - [KMT2C_HUMAN]	Rare	0.102273	0.09833
Q8NDI1	EHBP1	EH domain-binding protein 1 OS=Homo sapiens OX=9606 GN=EHBP1 PE=1 SV=3 - [EHBP1_HUMAN]	Rare	0.102273	0.09788
Q8TEM1	NUP210	Nuclear pore membrane glycoprotein 210 OS=Homo sapiens OX=9606 GN=NUP210 PE=1 SV=3 - [PO210_HUMAN]	Rare	0.102273	0.09769
Q96BY6	DOCK10	Dedicator of cytokinesis protein 10 OS=Homo sapiens OX=9606 GN=DOCK10 PE=1 SV=3 - [DOC10_HUMAN]	Rare	0.102273	0.09743
Q5JR59	MTUS2	Microtubule-associated tumor suppressor candidate 2 OS=Homo sapiens OX=9606 GN=MTUS2 PE=1 SV=3 - [MTUS2_HUMAN]	Rare	0.102273	0.09556
O43566	RGS14	Regulator of G-protein signaling 14 OS=Homo sapiens OX=9606 GN=RGS14 PE=1 SV=4 - [RGS14_HUMAN]	Rare	0.102273	0.09524
Q92859	NEO1	Neogenin OS=Homo sapiens OX=9606 GN=NEO1 PE=1 SV=2 - [NEO1_HUMAN]	Rare	0.102273	0.09498
Q86SP6	GPR149	Probable G-protein coupled receptor 149 OS=Homo sapiens OX=9606 GN=GPR149 PE=2 SV=2 - [GP149_HUMAN]	Rare	0.102273	0.09401
Q14674	ESPL1	Separin OS=Homo sapiens OX=9606 GN=ESPL1 PE=1 SV=3 - [ESPL1_HUMAN]	Rare	0.102273	0.09362
O15027	SEC16A	Protein transport protein Sec16A OS=Homo sapiens OX=9606 GN=SEC16A PE=1 SV=4 - [SC16A_HUMAN]	Rare	0.102273	0.09336
Q9BXS9	SLC26A6	Solute carrier family 26 member 6 OS=Homo sapiens OX=9606 GN=SLC26A6 PE=1 SV=1 - [S26A6_HUMAN]	Rare	0.102273	0.0933
Q8N2N9	ANKRD36B	Ankyrin repeat domain-containing protein 36B OS=Homo sapiens OX=9606 GN=ANKRD36B PE=1 SV=4 - [AN36B_HUMAN]	Rare	0.102273	0.08704
Q6B0B8	TIGD3	Tigger transposable element-derived protein 3 OS=Homo sapiens OX=9606 GN=TIGD3 PE=1 SV=1 - [TIGD3_HUMAN]	Rare	0.102273	0.08568
Q92673	SORL1	Sortilin-related receptor OS=Homo sapiens OX=9606 GN=SORL1 PE=1 SV=2 - [SORL_HUMAN]	Rare	0.102273	0.08342
Q9P2J2	IGSF9	Protein turtle homolog A OS=Homo sapiens OX=9606 GN=IGSF9 PE=1 SV=2 - [TUTLA_HUMAN]	Rare	0.102273	0.08019
Q14571	ITPR2	Inositol 1,4,5-trisphosphate receptor type 2 OS=Homo sapiens OX=9606 GN=ITPR2 PE=1 SV=2 - [ITPR2_HUMAN]	Rare	0.102273	0.07987
Q96H22	CENPN	Centromere protein N OS=Homo sapiens OX=9606 GN=CENPN PE=1 SV=2 - [CENPN_HUMAN]	Rare	0.102273	0.07961
O75691	UTP20	Small subunit processome component 20 homolog OS=Homo sapiens OX=9606 GN=UTP20 PE=1 SV=3 - [UTP20_HUMAN]	Rare	0.102273	0.07787
Q9NUJ3	TCP11L1	T-complex protein 11-like protein 1 OS=Homo sapiens OX=9606 GN=TCP11L1 PE=1 SV=1 - [T11L1_HUMAN]	Rare	0.102273	0.07302
Q8IV08	PLD3	5'-3' exonuclease PLD3 OS=Homo sapiens OX=9606 GN=PLD3 PE=1 SV=1 - [PLD3_HUMAN]	Rare	0.102273	0.06902
A6NJZ7	RIMBP3C	RIMS-binding protein 3C OS=Homo sapiens OX=9606 GN=RIMBP3C PE=1 SV=3 - [RIM3C_HUMAN]	Rare	0.102273	0.06624
Q6ZNA4	RNF111	E3 ubiquitin-protein ligase Arkadia OS=Homo sapiens OX=9606 GN=RNF111 PE=1 SV=3 - [RN111_HUMAN]	Rare	0.102273	0.06256
P04259	KRT6B	Keratin, type II cytoskeletal 6B OS=Homo sapiens OX=9606 GN=KRT6B PE=1 SV=5 - [K2C6B_HUMAN]	Rare	0.0909091	4.74077
P01619	IGKV3-20	Immunoglobulin kappa variable 3-20 OS=Homo sapiens OX=9606 GN=IGKV3-20 PE=1 SV=2 - [KV320_HUMAN]	Rare	0.0909091	0.86532
Q99572	P2RX7	P2X purinoceptor 7 OS=Homo sapiens OX=9606 GN=P2RX7 PE=1 SV=4 - [P2RX7_HUMAN]	Rare	0.0909091	0.3012
Q14CX7	NAA25	N-alpha-acetyltransferase 25, NatB auxiliary subunit OS=Homo sapiens OX=9606 GN=NAA25 PE=1 SV=1 - [NAA25_HUMAN]	Rare	0.0909091	0.23224
Q9Y6X0	SETBP1	SET-binding protein OS=Homo sapiens OX=9606 GN=SETBP1 PE=1 SV=3 - [SETBP_HUMAN]	Rare	0.0909091	0.21313
Q9UPS6	SETD1B	Histone-lysine N-methyltransferase SETD1B OS=Homo sapiens OX=9606 GN=SETD1B PE=1 SV=3 - [SET1B_HUMAN]	Rare	0.0909091	0.211
Q8NDV3	SMC1B	Structural maintenance of chromosomes protein 1B OS=Homo sapiens OX=9606 GN=SMC1B PE=2 SV=2 - [SMC1B_HUMAN]	Rare	0.0909091	0.21087
Q9BZF3	OSBPL6	Oxysterol-binding protein-related protein 6 OS=Homo sapiens OX=9606 GN=OSBPL6 PE=1 SV=1 - [OSBL6_HUMAN]	Rare	0.0909091	0.20835
P58107	EPPK1	Epiplakin OS=Homo sapiens OX=9606 GN=EPPK1 PE=1 SV=3 - [EPIPL_HUMAN]	Rare	0.0909091	0.19234
Q9NV88	INTS9	Integrator complex subunit 9 OS=Homo sapiens OX=9606 GN=INTS9 PE=1 SV=2 - [INT9_HUMAN]	Rare	0.0909091	0.18259
O14939	PLD2	Phospholipase D2 OS=Homo sapiens OX=9606 GN=PLD2 PE=1 SV=2 - [PLD2_HUMAN]	Rare	0.0909091	0.1722
Q562E7	WDR81	WD repeat-containing protein 81 OS=Homo sapiens OX=9606 GN=WDR81 PE=1 SV=2 - [WDR81_HUMAN]	Rare	0.0909091	0.16807
Q5D862	FLG2	Filaggrin-2 OS=Homo sapiens OX=9606 GN=FLG2 PE=1 SV=1 - [FILA2_HUMAN]	Rare	0.0909091	0.16794
Q6ZQQ6	WDR87	WD repeat-containing protein 87 OS=Homo sapiens OX=9606 GN=WDR87 PE=1 SV=3 - [WDR87_HUMAN]	Rare	0.0909091	0.16587
O75343	GUCY1B2	Guanylate cyclase soluble subunit beta-2 OS=Homo sapiens OX=9606 GN=GUCY1B2 PE=5 SV=2 - [GCYB2_HUMAN]	Rare	0.0909091	0.16574
Q08188	TGM3	Protein-glutamine gamma-glutamyltransferase E OS=Homo sapiens OX=9606 GN=TGM3 PE=1 SV=4 - [TGM3_HUMAN]	Rare	0.0909091	0.16309
Q8TCU4	ALMS1	Alstrom syndrome protein 1 OS=Homo sapiens OX=9606 GN=ALMS1 PE=1 SV=4 - [ALMS1_HUMAN]	Rare	0.0909091	0.15954
Q9Y2K9	STXBP5L	Syntaxin-binding protein 5-like OS=Homo sapiens OX=9606 GN=STXBP5L PE=1 SV=2 - [STB5L_HUMAN]	Rare	0.0909091	0.15057
Q6ZVT0	TTLL10	Inactive polyglycylase TTLL10 OS=Homo sapiens OX=9606 GN=TTLL10 PE=1 SV=2 - [TTL10_HUMAN]	Rare	0.0909091	0.14611
P55196	AFDN	Afadin OS=Homo sapiens OX=9606 GN=AFDN PE=1 SV=3 - [AFAD_HUMAN]	Rare	0.0909091	0.14547
Q5T5U3	ARHGAP21	Rho GTPase-activating protein 21 OS=Homo sapiens OX=9606 GN=ARHGAP21 PE=1 SV=2 - [RHG21_HUMAN]	Rare	0.0909091	0.14392
Q8IVI9	NOSTRIN	Nostrin OS=Homo sapiens OX=9606 GN=NOSTRIN PE=1 SV=2 - [NOSTN_HUMAN]	Rare	0.0909091	0.14062
Q5VZP5	STYXL2	Serine/threonine/tyrosine-interacting-like protein 2 OS=Homo sapiens OX=9606 GN=STYXL2 PE=2 SV=1 - [STYL2_HUMAN]	Rare	0.0909091	0.14024
Q9NRA1	PDGFC	Platelet-derived growth factor C OS=Homo sapiens OX=9606 GN=PDGFC PE=1 SV=2 - [PDGFC_HUMAN]	Rare	0.0909091	0.1392
Q9Y4Z2	NEUROG3	Neurogenin-3 OS=Homo sapiens OX=9606 GN=NEUROG3 PE=1 SV=2 - [NGN3_HUMAN]	Rare	0.0909091	0.1374
Q63HK5	TSHZ3	Teashirt homolog 3 OS=Homo sapiens OX=9606 GN=TSHZ3 PE=1 SV=2 - [TSH3_HUMAN]	Rare	0.0909091	0.13604
Q7L311	ARMCX2	Armadillo repeat-containing X-linked protein 2 OS=Homo sapiens OX=9606 GN=ARMCX2 PE=2 SV=1 - [ARMX2_HUMAN]	Rare	0.0909091	0.13314
Q5MNV8	FBXO47	F-box only protein 47 OS=Homo sapiens OX=9606 GN=FBXO47 PE=2 SV=2 - [FBX47_HUMAN]	Rare	0.0909091	0.1259
P20702	ITGAX	Integrin alpha-X OS=Homo sapiens OX=9606 GN=ITGAX PE=1 SV=3 - [ITAX_HUMAN]	Rare	0.0909091	0.12371
O95198	KLHL2	Kelch-like protein 2 OS=Homo sapiens OX=9606 GN=KLHL2 PE=1 SV=2 - [KLHL2_HUMAN]	Rare	0.0909091	0.12293
A8MV23	SERPINE3	Serpin E3 OS=Homo sapiens OX=9606 GN=SERPINE3 PE=2 SV=2 - [SERP3_HUMAN]	Rare	0.0909091	0.12074
P04278	SHBG	Sex hormone-binding globulin OS=Homo sapiens OX=9606 GN=SHBG PE=1 SV=2 - [SHBG_HUMAN]	Rare	0.0909091	0.12003
Q9NZP8	C1RL	Complement C1r subcomponent-like protein OS=Homo sapiens OX=9606 GN=C1RL PE=1 SV=2 - [C1RL_HUMAN]	Rare	0.0909091	0.11932
Q8N3Z0	PRSS35	Inactive serine protease 35 OS=Homo sapiens OX=9606 GN=PRSS35 PE=1 SV=2 - [PRS35_HUMAN]	Rare	0.0909091	0.11803
Q8N9H8	EXD3	Exonuclease mut-7 homolog OS=Homo sapiens OX=9606 GN=EXD3 PE=1 SV=3 - [MUT7_HUMAN]	Rare	0.0909091	0.11803
Q75V66	ANO5	Anoctamin-5 OS=Homo sapiens OX=9606 GN=ANO5 PE=1 SV=1 - [ANO5_HUMAN]	Rare	0.0909091	0.1179
Q86Y38	XYLT1	Xylosyltransferase 1 OS=Homo sapiens OX=9606 GN=XYLT1 PE=1 SV=1 - [XYLT1_HUMAN]	Rare	0.0909091	0.11764
P55060	CSE1L	Exportin-2 OS=Homo sapiens OX=9606 GN=CSE1L PE=1 SV=3 - [XPO2_HUMAN]	Rare	0.0909091	0.11738
Q9NZP6	NPAP1	Nuclear pore-associated protein 1 OS=Homo sapiens OX=9606 GN=NPAP1 PE=1 SV=2 - [NPAP1_HUMAN]	Rare	0.0909091	0.11738
Q6ZMW3	EML6	Echinoderm microtubule-associated protein-like 6 OS=Homo sapiens OX=9606 GN=EML6 PE=2 SV=2 - [EMAL6_HUMAN]	Rare	0.0909091	0.1168
Q68DK2	ZFYVE26	Zinc finger FYVE domain-containing protein 26 OS=Homo sapiens OX=9606 GN=ZFYVE26 PE=1 SV=3 - [ZFY26_HUMAN]	Rare	0.0909091	0.11622
Q5SYB0	FRMPD1	FERM and PDZ domain-containing protein 1 OS=Homo sapiens OX=9606 GN=FRMPD1 PE=1 SV=1 - [FRPD1_HUMAN]	Rare	0.0909091	0.11377
P12980	LYL1	Protein lyl-1 OS=Homo sapiens OX=9606 GN=LYL1 PE=1 SV=3 - [LYL1_HUMAN]	Rare	0.0909091	0.11209
P62937	PPIA	Peptidyl-prolyl cis-trans isomerase A OS=Homo sapiens OX=9606 GN=PPIA PE=1 SV=2 - [PPIA_HUMAN]	Rare	0.0909091	0.11041
Q8IYU2	HACE1	E3 ubiquitin-protein ligase HACE1 OS=Homo sapiens OX=9606 GN=HACE1 PE=1 SV=2 - [HACE1_HUMAN]	Rare	0.0909091	0.1095
Q15652	JMJD1C	Probable JmjC domain-containing histone demethylation protein 2C OS=Homo sapiens OX=9606 GN=JMJD1C PE=1 SV=2 - [JHD2C_HUMAN]	Rare	0.0909091	0.10841
Q5VT97	SYDE2	Rho GTPase-activating protein SYDE2 OS=Homo sapiens OX=9606 GN=SYDE2 PE=1 SV=2 - [SYDE2_HUMAN]	Rare	0.0909091	0.10808
O00411	POLRMT	DNA-directed RNA polymerase, mitochondrial OS=Homo sapiens OX=9606 GN=POLRMT PE=1 SV=2 - [RPOM_HUMAN]	Rare	0.0909091	0.10795
Q9NQX0	PRDM6	Putative histone-lysine N-methyltransferase PRDM6 OS=Homo sapiens OX=9606 GN=PRDM6 PE=1 SV=2 - [PRDM6_HUMAN]	Rare	0.0909091	0.10763
Q5VUA4	ZNF318	Zinc finger protein 318 OS=Homo sapiens OX=9606 GN=ZNF318 PE=1 SV=2 - [ZN318_HUMAN]	Rare	0.0909091	0.10486
Q6P1Q0	LETMD1	LETM1 domain-containing protein 1 OS=Homo sapiens OX=9606 GN=LETMD1 PE=1 SV=1 - [LTMD1_HUMAN]	Rare	0.0909091	0.1046
Q9C091	GREB1L	GREB1-like protein OS=Homo sapiens OX=9606 GN=GREB1L PE=1 SV=2 - [GRB1L_HUMAN]	Rare	0.0909091	0.10453
A2PYH4	HFM1	Probable ATP-dependent DNA helicase HFM1 OS=Homo sapiens OX=9606 GN=HFM1 PE=1 SV=2 - [HFM1_HUMAN]	Rare	0.0909091	0.10402
Q14573	ITPR3	Inositol 1,4,5-trisphosphate receptor type 3 OS=Homo sapiens OX=9606 GN=ITPR3 PE=1 SV=2 - [ITPR3_HUMAN]	Rare	0.0909091	0.10376
Q7Z410	TMPRSS9	Transmembrane protease serine 9 OS=Homo sapiens OX=9606 GN=TMPRSS9 PE=1 SV=2 - [TMPS9_HUMAN]	Rare	0.0909091	0.10369
Q5VTQ0	TTC39B	Tetratricopeptide repeat protein 39B OS=Homo sapiens OX=9606 GN=TTC39B PE=1 SV=4 - [TT39B_HUMAN]	Rare	0.0909091	0.10272
O75962	TRIO	Triple functional domain protein OS=Homo sapiens OX=9606 GN=TRIO PE=1 SV=2 - [TRIO_HUMAN]	Rare	0.0909091	0.1026
Q9P2D8	UNC79	Protein unc-79 homolog OS=Homo sapiens OX=9606 GN=UNC79 PE=2 SV=4 - [UNC79_HUMAN]	Rare	0.0909091	0.1024
Q9ULD0	OGDHL	2-oxoglutarate dehydrogenase-like, mitochondrial OS=Homo sapiens OX=9606 GN=OGDHL PE=1 SV=3 - [OGDHL_HUMAN]	Rare	0.0909091	0.10105
Q6NT32	CES5A	Carboxylesterase 5A OS=Homo sapiens OX=9606 GN=CES5A PE=2 SV=1 - [EST5A_HUMAN]	Rare	0.0909091	0.09995
Q9BZF9	UACA	Uveal autoantigen with coiled-coil domains and ankyrin repeats OS=Homo sapiens OX=9606 GN=UACA PE=1 SV=2 - [UACA_HUMAN]	Rare	0.0909091	0.09982
Q7L775	EPM2AIP1	EPM2A-interacting protein 1 OS=Homo sapiens OX=9606 GN=EPM2AIP1 PE=1 SV=1 - [EPMIP_HUMAN]	Rare	0.0909091	0.09943
Q9NR48	ASH1L	Histone-lysine N-methyltransferase ASH1L OS=Homo sapiens OX=9606 GN=ASH1L PE=1 SV=2 - [ASH1L_HUMAN]	Rare	0.0909091	0.09943
Q8N3K9	CMYA5	Cardiomyopathy-associated protein 5 OS=Homo sapiens OX=9606 GN=CMYA5 PE=1 SV=3 - [CMYA5_HUMAN]	Rare	0.0909091	0.09937
Q14679	TTLL4	Tubulin polyglutamylase TTLL4 OS=Homo sapiens OX=9606 GN=TTLL4 PE=1 SV=2 - [TTLL4_HUMAN]	Rare	0.0909091	0.09769
Q5VV67	PPRC1	Peroxisome proliferator-activated receptor gamma coactivator-related protein 1 OS=Homo sapiens OX=9606 GN=PPRC1 PE=1 SV=1 - [PPRC1_HUMAN]	Rare	0.0909091	0.09743
Q6YN16	HSDL2	Hydroxysteroid dehydrogenase-like protein 2 OS=Homo sapiens OX=9606 GN=HSDL2 PE=1 SV=1 - [HSDL2_HUMAN]	Rare	0.0909091	0.09562
P78367	NKX3-2	Homeobox protein Nkx-3.2 OS=Homo sapiens OX=9606 GN=NKX3-2 PE=1 SV=2 - [NKX32_HUMAN]	Rare	0.0909091	0.09524
P05107	ITGB2	Integrin beta-2 OS=Homo sapiens OX=9606 GN=ITGB2 PE=1 SV=2 - [ITB2_HUMAN]	Rare	0.0909091	0.09349
Q99569	PKP4	Plakophilin-4 OS=Homo sapiens OX=9606 GN=PKP4 PE=1 SV=2 - [PKP4_HUMAN]	Rare	0.0909091	0.09349
Q99460	PSMD1	26S proteasome non-ATPase regulatory subunit 1 OS=Homo sapiens OX=9606 GN=PSMD1 PE=1 SV=2 - [PSMD1_HUMAN]	Rare	0.0909091	0.0933
Q96DM3	RMC1	Regulator of MON1-CCZ1 complex OS=Homo sapiens OX=9606 GN=RMC1 PE=1 SV=2 - [RMC1_HUMAN]	Rare	0.0909091	0.09285
P54098	POLG	DNA polymerase subunit gamma-1 OS=Homo sapiens OX=9606 GN=POLG PE=1 SV=1 - [DPOG1_HUMAN]	Rare	0.0909091	0.09278
Q69YN4	VIRMA	Protein virilizer homolog OS=Homo sapiens OX=9606 GN=VIRMA PE=1 SV=2 - [VIR_HUMAN]	Rare	0.0909091	0.09201
O75443	TECTA	Alpha-tectorin OS=Homo sapiens OX=9606 GN=TECTA PE=1 SV=3 - [TECTA_HUMAN]	Rare	0.0909091	0.09162
Q5VTH9	DNAI4	Dynein intermediate chain 4, axonemal OS=Homo sapiens OX=9606 GN=DNAI4 PE=2 SV=1 - [DNAI4_HUMAN]	Rare	0.0909091	0.09162
Q96L91	EP400	E1A-binding protein p400 OS=Homo sapiens OX=9606 GN=EP400 PE=1 SV=4 - [EP400_HUMAN]	Rare	0.0909091	0.09097
Q96DT5	DNAH11	Dynein heavy chain 11, axonemal OS=Homo sapiens OX=9606 GN=DNAH11 PE=1 SV=4 - [DYH11_HUMAN]	Rare	0.0909091	0.09078
Q9P2P5	HECW2	E3 ubiquitin-protein ligase HECW2 OS=Homo sapiens OX=9606 GN=HECW2 PE=1 SV=2 - [HECW2_HUMAN]	Rare	0.0909091	0.09039
P16234	PDGFRA	Platelet-derived growth factor receptor alpha OS=Homo sapiens OX=9606 GN=PDGFRA PE=1 SV=1 - [PGFRA_HUMAN]	Rare	0.0909091	0.08988
Q9BZ29	DOCK9	Dedicator of cytokinesis protein 9 OS=Homo sapiens OX=9606 GN=DOCK9 PE=1 SV=2 - [DOCK9_HUMAN]	Rare	0.0909091	0.08968
Q63ZY3	KANK2	KN motif and ankyrin repeat domain-containing protein 2 OS=Homo sapiens OX=9606 GN=KANK2 PE=1 SV=1 - [KANK2_HUMAN]	Rare	0.0909091	0.08936
Q6ZUV0	ACOT7L	Putative cytosolic acyl coenzyme A thioester hydrolase-like OS=Homo sapiens OX=9606 GN=ACOT7L PE=5 SV=1 - [BACHL_HUMAN]	Rare	0.0909091	0.08865
Q6PIF6	MYO7B	Unconventional myosin-VIIb OS=Homo sapiens OX=9606 GN=MYO7B PE=1 SV=2 - [MYO7B_HUMAN]	Rare	0.0909091	0.08852
Q9Y6R4	MAP3K4	Mitogen-activated protein kinase kinase kinase 4 OS=Homo sapiens OX=9606 GN=MAP3K4 PE=1 SV=2 - [M3K4_HUMAN]	Rare	0.0909091	0.08755
P25391	LAMA1	Laminin subunit alpha-1 OS=Homo sapiens OX=9606 GN=LAMA1 PE=1 SV=2 - [LAMA1_HUMAN]	Rare	0.0909091	0.08716
O00370		LINE-1 retrotransposable element ORF2 protein OS=Homo sapiens OX=9606 PE=1 SV=1 - [LORF2_HUMAN]	Rare	0.0909091	0.08549
Q75MW2	ZNF767P	Protein ZNF767 OS=Homo sapiens OX=9606 GN=ZNF767P PE=5 SV=1 - [ZN767_HUMAN]	Rare	0.0909091	0.08542
P01701	IGLV1-51	Immunoglobulin lambda variable 1-51 OS=Homo sapiens OX=9606 GN=IGLV1-51 PE=1 SV=2 - [LV151_HUMAN]	Rare	0.0909091	0.08503
P38570	ITGAE	Integrin alpha-E OS=Homo sapiens OX=9606 GN=ITGAE PE=1 SV=3 - [ITAE_HUMAN]	Rare	0.0909091	0.08465
Q96GE5	ZNF799	Zinc finger protein 799 OS=Homo sapiens OX=9606 GN=ZNF799 PE=2 SV=4 - [ZN799_HUMAN]	Rare	0.0909091	0.08439
Q8NBJ4	GOLM1	Golgi membrane protein 1 OS=Homo sapiens OX=9606 GN=GOLM1 PE=1 SV=1 - [GOLM1_HUMAN]	Rare	0.0909091	0.08323
O95342	ABCB11	Bile salt export pump OS=Homo sapiens OX=9606 GN=ABCB11 PE=1 SV=2 - [ABCBB_HUMAN]	Rare	0.0909091	0.08226
O94901	SUN1	SUN domain-containing protein 1 OS=Homo sapiens OX=9606 GN=SUN1 PE=1 SV=3 - [SUN1_HUMAN]	Rare	0.0909091	0.08129
Q8N8W4	PNPLA1	Patatin-like phospholipase domain-containing protein 1 OS=Homo sapiens OX=9606 GN=PNPLA1 PE=1 SV=3 - [PLPL1_HUMAN]	Rare	0.0909091	0.08129
Q8IUG5	MYO18B	Unconventional myosin-XVIIIb OS=Homo sapiens OX=9606 GN=MYO18B PE=1 SV=2 - [MY18B_HUMAN]	Rare	0.0909091	0.08084
Q9UQE7	SMC3	Structural maintenance of chromosomes protein 3 OS=Homo sapiens OX=9606 GN=SMC3 PE=1 SV=2 - [SMC3_HUMAN]	Rare	0.0909091	0.08058
O15031	PLXNB2	Plexin-B2 OS=Homo sapiens OX=9606 GN=PLXNB2 PE=1 SV=3 - [PLXB2_HUMAN]	Rare	0.0909091	0.08038
Q15846	CLUL1	Clusterin-like protein 1 OS=Homo sapiens OX=9606 GN=CLUL1 PE=2 SV=1 - [CLUL1_HUMAN]	Rare	0.0909091	0.08032
Q9BYS8	LRRC2	Leucine-rich repeat-containing protein 2 OS=Homo sapiens OX=9606 GN=LRRC2 PE=2 SV=2 - [LRRC2_HUMAN]	Rare	0.0909091	0.07935
B0I1T2	MYO1G	Unconventional myosin-Ig OS=Homo sapiens OX=9606 GN=MYO1G PE=1 SV=2 - [MYO1G_HUMAN]	Rare	0.0909091	0.07922
Q96P56	CATSPER2	Cation channel sperm-associated protein 2 OS=Homo sapiens OX=9606 GN=CATSPER2 PE=1 SV=2 - [CTSR2_HUMAN]	Rare	0.0909091	0.07909
Q9Y6D6	ARFGEF1	Brefeldin A-inhibited guanine nucleotide-exchange protein 1 OS=Homo sapiens OX=9606 GN=ARFGEF1 PE=1 SV=2 - [BIG1_HUMAN]	Rare	0.0909091	0.07774
Q99501	GAS2L1	GAS2-like protein 1 OS=Homo sapiens OX=9606 GN=GAS2L1 PE=1 SV=2 - [GA2L1_HUMAN]	Rare	0.0909091	0.0767
O14981	BTAF1	TATA-binding protein-associated factor 172 OS=Homo sapiens OX=9606 GN=BTAF1 PE=1 SV=2 - [BTAF1_HUMAN]	Rare	0.0909091	0.07457
Q9BYW1	SLC2A11	Solute carrier family 2, facilitated glucose transporter member 11 OS=Homo sapiens OX=9606 GN=SLC2A11 PE=1 SV=1 - [GTR11_HUMAN]	Rare	0.0909091	0.07399
Q86UP3	ZFHX4	Zinc finger homeobox protein 4 OS=Homo sapiens OX=9606 GN=ZFHX4 PE=1 SV=1 - [ZFHX4_HUMAN]	Rare	0.0909091	0.07373
Q4KMG0	CDON	Cell adhesion molecule-related/down-regulated by oncogenes OS=Homo sapiens OX=9606 GN=CDON PE=1 SV=2 - [CDON_HUMAN]	Rare	0.0909091	0.07244
Q96Q89	KIF20B	Kinesin-like protein KIF20B OS=Homo sapiens OX=9606 GN=KIF20B PE=1 SV=3 - [KI20B_HUMAN]	Rare	0.0909091	0.07244
A7KAX9	ARHGAP32	Rho GTPase-activating protein 32 OS=Homo sapiens OX=9606 GN=ARHGAP32 PE=1 SV=1 - [RHG32_HUMAN]	Rare	0.0909091	0.07231
Q9NT68	TENM2	Teneurin-2 OS=Homo sapiens OX=9606 GN=TENM2 PE=1 SV=3 - [TEN2_HUMAN]	Rare	0.0909091	0.07193
Q92547	TOPBP1	DNA topoisomerase 2-binding protein 1 OS=Homo sapiens OX=9606 GN=TOPBP1 PE=1 SV=3 - [TOPB1_HUMAN]	Rare	0.0909091	0.0696
P16157	ANK1	Ankyrin-1 OS=Homo sapiens OX=9606 GN=ANK1 PE=1 SV=3 - [ANK1_HUMAN]	Rare	0.0909091	0.06947
Q9Y4I1	MYO5A	Unconventional myosin-Va OS=Homo sapiens OX=9606 GN=MYO5A PE=1 SV=2 - [MYO5A_HUMAN]	Rare	0.0909091	0.06883
Q92610	ZNF592	Zinc finger protein 592 OS=Homo sapiens OX=9606 GN=ZNF592 PE=1 SV=2 - [ZN592_HUMAN]	Rare	0.0909091	0.06831
P04066	FUCA1	Tissue alpha-L-fucosidase OS=Homo sapiens OX=9606 GN=FUCA1 PE=1 SV=4 - [FUCO_HUMAN]	Rare	0.0909091	0.06405
Q9BTY2	FUCA2	Plasma alpha-L-fucosidase OS=Homo sapiens OX=9606 GN=FUCA2 PE=1 SV=2 - [FUCO2_HUMAN]	Rare	0.0909091	0.05721
P43355	MAGEA1	Melanoma-associated antigen 1 OS=Homo sapiens OX=9606 GN=MAGEA1 PE=1 SV=1 - [MAGA1_HUMAN]	Rare	0.0795455	0.27615
Q9NR22	PRMT8	Protein arginine N-methyltransferase 8 OS=Homo sapiens OX=9606 GN=PRMT8 PE=1 SV=2 - [ANM8_HUMAN]	Rare	0.0795455	0.21681
Q9C073	FAM117A	Protein FAM117A OS=Homo sapiens OX=9606 GN=FAM117A PE=1 SV=1 - [F117A_HUMAN]	Rare	0.0795455	0.19609
Q9UPA5	BSN	Protein bassoon OS=Homo sapiens OX=9606 GN=BSN PE=1 SV=4 - [BSN_HUMAN]	Rare	0.0795455	0.19473
Q07864	POLE	DNA polymerase epsilon catalytic subunit A OS=Homo sapiens OX=9606 GN=POLE PE=1 SV=5 - [DPOE1_HUMAN]	Rare	0.0795455	0.18679
P01699	IGLV1-44	Immunoglobulin lambda variable 1-44 OS=Homo sapiens OX=9606 GN=IGLV1-44 PE=1 SV=2 - [LV144_HUMAN]	Rare	0.0795455	0.16813
P81605	DCD	Dermcidin OS=Homo sapiens OX=9606 GN=DCD PE=1 SV=2 - [DCD_HUMAN]	Rare	0.0795455	0.16781
P02741	CRP	C-reactive protein OS=Homo sapiens OX=9606 GN=CRP PE=1 SV=1 - [CRP_HUMAN]	Rare	0.0795455	0.16613
O43151	TET3	Methylcytosine dioxygenase TET3 OS=Homo sapiens OX=9606 GN=TET3 PE=1 SV=4 - [TET3_HUMAN]	Rare	0.0795455	0.16419
A6NES4	MROH2A	Maestro heat-like repeat-containing protein family member 2A OS=Homo sapiens OX=9606 GN=MROH2A PE=4 SV=4 - [MRO2A_HUMAN]	Rare	0.0795455	0.15554
Q3B7T1	EDRF1	Erythroid differentiation-related factor 1 OS=Homo sapiens OX=9606 GN=EDRF1 PE=1 SV=1 - [EDRF1_HUMAN]	Rare	0.0795455	0.14928
P58005	SESN3	Sestrin-3 OS=Homo sapiens OX=9606 GN=SESN3 PE=1 SV=2 - [SESN3_HUMAN]	Rare	0.0795455	0.14534
Q05901	CHRNB3	Neuronal acetylcholine receptor subunit beta-3 OS=Homo sapiens OX=9606 GN=CHRNB3 PE=2 SV=2 - [ACHB3_HUMAN]	Rare	0.0795455	0.13171
O43909	EXTL3	Exostosin-like 3 OS=Homo sapiens OX=9606 GN=EXTL3 PE=1 SV=1 - [EXTL3_HUMAN]	Rare	0.0795455	0.12939
Q9BTC0	DIDO1	Death-inducer obliterator 1 OS=Homo sapiens OX=9606 GN=DIDO1 PE=1 SV=5 - [DIDO1_HUMAN]	Rare	0.0795455	0.12636
P07195	LDHB	L-lactate dehydrogenase B chain OS=Homo sapiens OX=9606 GN=LDHB PE=1 SV=2 - [LDHB_HUMAN]	Rare	0.0795455	0.12474
Q96RR4	CAMKK2	Calcium/calmodulin-dependent protein kinase kinase 2 OS=Homo sapiens OX=9606 GN=CAMKK2 PE=1 SV=2 - [KKCC2_HUMAN]	Rare	0.0795455	0.12255
P51610	HCFC1	Host cell factor 1 OS=Homo sapiens OX=9606 GN=HCFC1 PE=1 SV=2 - [HCFC1_HUMAN]	Rare	0.0795455	0.12248
Q9H799	CPLANE1	Ciliogenesis and planar polarity effector 1 OS=Homo sapiens OX=9606 GN=CPLANE1 PE=1 SV=4 - [CPLN1_HUMAN]	Rare	0.0795455	0.12216
O75369	FLNB	Filamin-B OS=Homo sapiens OX=9606 GN=FLNB PE=1 SV=2 - [FLNB_HUMAN]	Rare	0.0795455	0.12164
P86434	ADORA2A-AS1	Putative uncharacterized protein ADORA2A-AS1 OS=Homo sapiens OX=9606 GN=ADORA2A-AS1 PE=5 SV=1 - [AAS1_HUMAN]	Rare	0.0795455	0.12119
Q8IYD8	FANCM	Fanconi anemia group M protein OS=Homo sapiens OX=9606 GN=FANCM PE=1 SV=2 - [FANCM_HUMAN]	Rare	0.0795455	0.1208
Q12802	AKAP13	A-kinase anchor protein 13 OS=Homo sapiens OX=9606 GN=AKAP13 PE=1 SV=2 - [AKP13_HUMAN]	Rare	0.0795455	0.11848
Q96J66	ABCC11	ATP-binding cassette sub-family C member 11 OS=Homo sapiens OX=9606 GN=ABCC11 PE=1 SV=1 - [ABCCB_HUMAN]	Rare	0.0795455	0.11841
P46020	PHKA1	Phosphorylase b kinase regulatory subunit alpha, skeletal muscle isoform OS=Homo sapiens OX=9606 GN=PHKA1 PE=1 SV=2 - [KPB1_HUMAN]	Rare	0.0795455	0.11693
O95786	DDX58	Antiviral innate immune response receptor RIG-I OS=Homo sapiens OX=9606 GN=DDX58 PE=1 SV=2 - [DDX58_HUMAN]	Rare	0.0795455	0.11661
P20916	MAG	Myelin-associated glycoprotein OS=Homo sapiens OX=9606 GN=MAG PE=1 SV=1 - [MAG_HUMAN]	Rare	0.0795455	0.11635
Q9H7S9	ZNF703	Zinc finger protein 703 OS=Homo sapiens OX=9606 GN=ZNF703 PE=1 SV=1 - [ZN703_HUMAN]	Rare	0.0795455	0.11635
O00203	AP3B1	AP-3 complex subunit beta-1 OS=Homo sapiens OX=9606 GN=AP3B1 PE=1 SV=3 - [AP3B1_HUMAN]	Rare	0.0795455	0.11596
Q14676	MDC1	Mediator of DNA damage checkpoint protein 1 OS=Homo sapiens OX=9606 GN=MDC1 PE=1 SV=3 - [MDC1_HUMAN]	Rare	0.0795455	0.11538
Q99715	COL12A1	Collagen alpha-1(XII) chain OS=Homo sapiens OX=9606 GN=COL12A1 PE=1 SV=2 - [COCA1_HUMAN]	Rare	0.0795455	0.11409
A0A075B6J9	IGLV2-18	Immunoglobulin lambda variable 2-18 OS=Homo sapiens OX=9606 GN=IGLV2-18 PE=3 SV=2 - [LV218_HUMAN]	Rare	0.0795455	0.11235
Q8TE60	ADAMTS18	A disintegrin and metalloproteinase with thrombospondin motifs 18 OS=Homo sapiens OX=9606 GN=ADAMTS18 PE=1 SV=3 - [ATS18_HUMAN]	Rare	0.0795455	0.11183
Q9P0K7	RAI14	Ankycorbin OS=Homo sapiens OX=9606 GN=RAI14 PE=1 SV=2 - [RAI14_HUMAN]	Rare	0.0795455	0.11131
Q9H3W5	LRRN3	Leucine-rich repeat neuronal protein 3 OS=Homo sapiens OX=9606 GN=LRRN3 PE=2 SV=1 - [LRRN3_HUMAN]	Rare	0.0795455	0.10976
Q13349	ITGAD	Integrin alpha-D OS=Homo sapiens OX=9606 GN=ITGAD PE=1 SV=2 - [ITAD_HUMAN]	Rare	0.0795455	0.10905
P04083	ANXA1	Annexin A1 OS=Homo sapiens OX=9606 GN=ANXA1 PE=1 SV=2 - [ANXA1_HUMAN]	Rare	0.0795455	0.10524
Q9UL12	SARDH	Sarcosine dehydrogenase, mitochondrial OS=Homo sapiens OX=9606 GN=SARDH PE=1 SV=1 - [SARDH_HUMAN]	Rare	0.0795455	0.10518
P23468	PTPRD	Receptor-type tyrosine-protein phosphatase delta OS=Homo sapiens OX=9606 GN=PTPRD PE=1 SV=2 - [PTPRD_HUMAN]	Rare	0.0795455	0.1046
Q14008	CKAP5	Cytoskeleton-associated protein 5 OS=Homo sapiens OX=9606 GN=CKAP5 PE=1 SV=3 - [CKAP5_HUMAN]	Rare	0.0795455	0.1035
Q9UK41	VPS28	Vacuolar protein sorting-associated protein 28 homolog OS=Homo sapiens OX=9606 GN=VPS28 PE=1 SV=1 - [VPS28_HUMAN]	Rare	0.0795455	0.10208
Q68DQ2	CRYBG3	Very large A-kinase anchor protein OS=Homo sapiens OX=9606 GN=CRYBG3 PE=1 SV=3 - [CRBG3_HUMAN]	Rare	0.0795455	0.10189
O75445	USH2A	Usherin OS=Homo sapiens OX=9606 GN=USH2A PE=1 SV=3 - [USH2A_HUMAN]	Rare	0.0795455	0.10182
Q12955	ANK3	Ankyrin-3 OS=Homo sapiens OX=9606 GN=ANK3 PE=1 SV=3 - [ANK3_HUMAN]	Rare	0.0795455	0.10182
Q6UXX5	ITIH6	Inter-alpha-trypsin inhibitor heavy chain H6 OS=Homo sapiens OX=9606 GN=ITIH6 PE=1 SV=1 - [ITIH6_HUMAN]	Rare	0.0795455	0.09917
Q6ZSZ6	TSHZ1	Teashirt homolog 1 OS=Homo sapiens OX=9606 GN=TSHZ1 PE=1 SV=2 - [TSH1_HUMAN]	Rare	0.0795455	0.09911
Q92974	ARHGEF2	Rho guanine nucleotide exchange factor 2 OS=Homo sapiens OX=9606 GN=ARHGEF2 PE=1 SV=4 - [ARHG2_HUMAN]	Rare	0.0795455	0.09872
Q14565	DMC1	Meiotic recombination protein DMC1/LIM15 homolog OS=Homo sapiens OX=9606 GN=DMC1 PE=1 SV=2 - [DMC1_HUMAN]	Rare	0.0795455	0.09588
Q86YA3	ZGRF1	Protein ZGRF1 OS=Homo sapiens OX=9606 GN=ZGRF1 PE=1 SV=3 - [ZGRF1_HUMAN]	Rare	0.0795455	0.0944
Q9H3R1	NDST4	Bifunctional heparan sulfate N-deacetylase/N-sulfotransferase 4 OS=Homo sapiens OX=9606 GN=NDST4 PE=2 SV=1 - [NDST4_HUMAN]	Rare	0.0795455	0.09375
Q08AF3	SLFN5	Schlafen family member 5 OS=Homo sapiens OX=9606 GN=SLFN5 PE=1 SV=1 - [SLFN5_HUMAN]	Rare	0.0795455	0.09369
Q96K37	SLC35E1	Solute carrier family 35 member E1 OS=Homo sapiens OX=9606 GN=SLC35E1 PE=1 SV=2 - [S35E1_HUMAN]	Rare	0.0795455	0.09317
A5PLK6	RGSL1	Regulator of G-protein signaling protein-like OS=Homo sapiens OX=9606 GN=RGSL1 PE=2 SV=1 - [RGSL_HUMAN]	Rare	0.0795455	0.09214
P0DSN7	IGKV1D-37	Probable non-functional immunoglobulinn kappa variable 1D-37 OS=Homo sapiens OX=9606 GN=IGKV1D-37 PE=1 SV=1 - [KVD37_HUMAN]	Rare	0.0795455	0.09207
P08670	VIM	Vimentin OS=Homo sapiens OX=9606 GN=VIM PE=1 SV=4 - [VIME_HUMAN]	Rare	0.0795455	0.09181
P04114	APOB	Apolipoprotein B-100 OS=Homo sapiens OX=9606 GN=APOB PE=1 SV=2 - [APOB_HUMAN]	Rare	0.0795455	0.09155
Q3C1V9		Putative uncharacterized protein ENSP00000334305 OS=Homo sapiens OX=9606 PE=5 SV=2 - [YK041_HUMAN]	Rare	0.0795455	0.0913
Q13045	FLII	Protein flightless-1 homolog OS=Homo sapiens OX=9606 GN=FLII PE=1 SV=2 - [FLII_HUMAN]	Rare	0.0795455	0.09123
Q8TF72	SHROOM3	Protein Shroom3 OS=Homo sapiens OX=9606 GN=SHROOM3 PE=1 SV=2 - [SHRM3_HUMAN]	Rare	0.0795455	0.09091
Q9NVR2	INTS10	Integrator complex subunit 10 OS=Homo sapiens OX=9606 GN=INTS10 PE=1 SV=2 - [INT10_HUMAN]	Rare	0.0795455	0.09072
Q8TD84	DSCAML1	Down syndrome cell adhesion molecule-like protein 1 OS=Homo sapiens OX=9606 GN=DSCAML1 PE=1 SV=2 - [DSCL1_HUMAN]	Rare	0.0795455	0.09013
Q9UBS9	SUCO	SUN domain-containing ossification factor OS=Homo sapiens OX=9606 GN=SUCO PE=1 SV=1 - [SUCO_HUMAN]	Rare	0.0795455	0.08955
Q13075	NAIP	Baculoviral IAP repeat-containing protein 1 OS=Homo sapiens OX=9606 GN=NAIP PE=1 SV=3 - [BIRC1_HUMAN]	Rare	0.0795455	0.08942
Q8IYW2	CFAP46	Cilia- and flagella-associated protein 46 OS=Homo sapiens OX=9606 GN=CFAP46 PE=2 SV=3 - [CFA46_HUMAN]	Rare	0.0795455	0.08826
P13073	COX4I1	Cytochrome c oxidase subunit 4 isoform 1, mitochondrial OS=Homo sapiens OX=9606 GN=COX4I1 PE=1 SV=1 - [COX41_HUMAN]	Rare	0.0795455	0.08813
Q9UNK4	PLA2G2D	Group IID secretory phospholipase A2 OS=Homo sapiens OX=9606 GN=PLA2G2D PE=1 SV=2 - [PA2GD_HUMAN]	Rare	0.0795455	0.08697
Q08378	GOLGA3	Golgin subfamily A member 3 OS=Homo sapiens OX=9606 GN=GOLGA3 PE=1 SV=2 - [GOGA3_HUMAN]	Rare	0.0795455	0.08691
Q6V1P9	DCHS2	Protocadherin-23 OS=Homo sapiens OX=9606 GN=DCHS2 PE=2 SV=2 - [PCD23_HUMAN]	Rare	0.0795455	0.08652
P56937	HSD17B7	3-keto-steroid reductase/17-beta-hydroxysteroid dehydrogenase 7 OS=Homo sapiens OX=9606 GN=HSD17B7 PE=1 SV=1 - [DHB7_HUMAN]	Rare	0.0795455	0.08626
O95155	UBE4B	Ubiquitin conjugation factor E4 B OS=Homo sapiens OX=9606 GN=UBE4B PE=1 SV=1 - [UBE4B_HUMAN]	Rare	0.0795455	0.0862
O00763	ACACB	Acetyl-CoA carboxylase 2 OS=Homo sapiens OX=9606 GN=ACACB PE=1 SV=3 - [ACACB_HUMAN]	Rare	0.0795455	0.086
P30044	PRDX5	Peroxiredoxin-5, mitochondrial OS=Homo sapiens OX=9606 GN=PRDX5 PE=1 SV=4 - [PRDX5_HUMAN]	Rare	0.0795455	0.08587
O95376	ARIH2	E3 ubiquitin-protein ligase ARIH2 OS=Homo sapiens OX=9606 GN=ARIH2 PE=1 SV=1 - [ARI2_HUMAN]	Rare	0.0795455	0.08549
O75147	OBSL1	Obscurin-like protein 1 OS=Homo sapiens OX=9606 GN=OBSL1 PE=1 SV=4 - [OBSL1_HUMAN]	Rare	0.0795455	0.08445
A3KMH1	VWA8	von Willebrand factor A domain-containing protein 8 OS=Homo sapiens OX=9606 GN=VWA8 PE=1 SV=2 - [VWA8_HUMAN]	Rare	0.0795455	0.08381
O43896	KIF1C	Kinesin-like protein KIF1C OS=Homo sapiens OX=9606 GN=KIF1C PE=1 SV=3 - [KIF1C_HUMAN]	Rare	0.0795455	0.08368
Q8N7B1	HORMAD2	HORMA domain-containing protein 2 OS=Homo sapiens OX=9606 GN=HORMAD2 PE=1 SV=2 - [HORM2_HUMAN]	Rare	0.0795455	0.08342
Q7L014	DDX46	Probable ATP-dependent RNA helicase DDX46 OS=Homo sapiens OX=9606 GN=DDX46 PE=1 SV=2 - [DDX46_HUMAN]	Rare	0.0795455	0.08239
O15021	MAST4	Microtubule-associated serine/threonine-protein kinase 4 OS=Homo sapiens OX=9606 GN=MAST4 PE=1 SV=4 - [MAST4_HUMAN]	Rare	0.0795455	0.08219
Q9BQT9	CLSTN3	Calsyntenin-3 OS=Homo sapiens OX=9606 GN=CLSTN3 PE=1 SV=1 - [CSTN3_HUMAN]	Rare	0.0795455	0.08064
Q86U86	PBRM1	Protein polybromo-1 OS=Homo sapiens OX=9606 GN=PBRM1 PE=1 SV=1 - [PB1_HUMAN]	Rare	0.0795455	0.08058
Q9UJW2	TINAG	Tubulointerstitial nephritis antigen OS=Homo sapiens OX=9606 GN=TINAG PE=2 SV=3 - [TINAG_HUMAN]	Rare	0.0795455	0.0798
Q9P2D7	DNAH1	Dynein heavy chain 1, axonemal OS=Homo sapiens OX=9606 GN=DNAH1 PE=1 SV=5 - [DYH1_HUMAN]	Rare	0.0795455	0.07967
O43827	ANGPTL7	Angiopoietin-related protein 7 OS=Homo sapiens OX=9606 GN=ANGPTL7 PE=1 SV=1 - [ANGL7_HUMAN]	Rare	0.0795455	0.07916
Q92565	RAPGEF5	Rap guanine nucleotide exchange factor 5 OS=Homo sapiens OX=9606 GN=RAPGEF5 PE=1 SV=1 - [RPGF5_HUMAN]	Rare	0.0795455	0.07903
P57058	HUNK	Hormonally up-regulated neu tumor-associated kinase OS=Homo sapiens OX=9606 GN=HUNK PE=1 SV=1 - [HUNK_HUMAN]	Rare	0.0795455	0.07896
Q06033	ITIH3	Inter-alpha-trypsin inhibitor heavy chain H3 OS=Homo sapiens OX=9606 GN=ITIH3 PE=1 SV=2 - [ITIH3_HUMAN]	Rare	0.0795455	0.07877
P13798	APEH	Acylamino-acid-releasing enzyme OS=Homo sapiens OX=9606 GN=APEH PE=1 SV=4 - [ACPH_HUMAN]	Rare	0.0795455	0.07832
Q86VQ6	TXNRD3	Thioredoxin reductase 3 OS=Homo sapiens OX=9606 GN=TXNRD3 PE=1 SV=4 - [TRXR3_HUMAN]	Rare	0.0795455	0.07812
O43734	TRAF3IP2	E3 ubiquitin ligase TRAF3IP2 OS=Homo sapiens OX=9606 GN=TRAF3IP2 PE=1 SV=3 - [CIKS_HUMAN]	Rare	0.0795455	0.078
Q9BY89	KIAA1671	Uncharacterized protein KIAA1671 OS=Homo sapiens OX=9606 GN=KIAA1671 PE=1 SV=2 - [K1671_HUMAN]	Rare	0.0795455	0.07741
O15417	TNRC18	Trinucleotide repeat-containing gene 18 protein OS=Homo sapiens OX=9606 GN=TNRC18 PE=1 SV=3 - [TNC18_HUMAN]	Rare	0.0795455	0.07729
Q8NCQ5	FBXO15	F-box only protein 15 OS=Homo sapiens OX=9606 GN=FBXO15 PE=2 SV=2 - [FBX15_HUMAN]	Rare	0.0795455	0.07703
Q9H2S5	RNF39	RING finger protein 39 OS=Homo sapiens OX=9606 GN=RNF39 PE=1 SV=2 - [RNF39_HUMAN]	Rare	0.0795455	0.07696
Q14721	KCNB1	Potassium voltage-gated channel subfamily B member 1 OS=Homo sapiens OX=9606 GN=KCNB1 PE=1 SV=2 - [KCNB1_HUMAN]	Rare	0.0795455	0.07651
P20930	FLG	Filaggrin OS=Homo sapiens OX=9606 GN=FLG PE=1 SV=3 - [FILA_HUMAN]	Rare	0.0795455	0.0758
Q9H845	ACAD9	Complex I assembly factor ACAD9, mitochondrial OS=Homo sapiens OX=9606 GN=ACAD9 PE=1 SV=1 - [ACAD9_HUMAN]	Rare	0.0795455	0.07567
Q13620	CUL4B	Cullin-4B OS=Homo sapiens OX=9606 GN=CUL4B PE=1 SV=4 - [CUL4B_HUMAN]	Rare	0.0795455	0.07554
Q96JI7	SPG11	Spatacsin OS=Homo sapiens OX=9606 GN=SPG11 PE=1 SV=3 - [SPTCS_HUMAN]	Rare	0.0795455	0.07548
O75976	CPD	Carboxypeptidase D OS=Homo sapiens OX=9606 GN=CPD PE=1 SV=2 - [CBPD_HUMAN]	Rare	0.0795455	0.07535
Q16647	PTGIS	Prostacyclin synthase OS=Homo sapiens OX=9606 GN=PTGIS PE=1 SV=1 - [PTGIS_HUMAN]	Rare	0.0795455	0.07522
A6NH11	GLTPD2	Glycolipid transfer protein domain-containing protein 2 OS=Homo sapiens OX=9606 GN=GLTPD2 PE=1 SV=2 - [GLTD2_HUMAN]	Rare	0.0795455	0.07515
P78527	PRKDC	DNA-dependent protein kinase catalytic subunit OS=Homo sapiens OX=9606 GN=PRKDC PE=1 SV=3 - [PRKDC_HUMAN]	Rare	0.0795455	0.07496
Q99996	AKAP9	A-kinase anchor protein 9 OS=Homo sapiens OX=9606 GN=AKAP9 PE=1 SV=4 - [AKAP9_HUMAN]	Rare	0.0795455	0.07496
Q8N3C0	ASCC3	Activating signal cointegrator 1 complex subunit 3 OS=Homo sapiens OX=9606 GN=ASCC3 PE=1 SV=3 - [ASCC3_HUMAN]	Rare	0.0795455	0.07457
Q9NXH8	TOR4A	Torsin-4A OS=Homo sapiens OX=9606 GN=TOR4A PE=1 SV=2 - [TOR4A_HUMAN]	Rare	0.0795455	0.07412
Q9BTV6	DPH7	Diphthine methyltransferase OS=Homo sapiens OX=9606 GN=DPH7 PE=1 SV=2 - [DPH7_HUMAN]	Rare	0.0795455	0.07386
Q49MG5	MAP9	Microtubule-associated protein 9 OS=Homo sapiens OX=9606 GN=MAP9 PE=1 SV=3 - [MAP9_HUMAN]	Rare	0.0795455	0.07361
Q8NHH1	TTLL11	Tubulin polyglutamylase TTLL11 OS=Homo sapiens OX=9606 GN=TTLL11 PE=1 SV=2 - [TTL11_HUMAN]	Rare	0.0795455	0.07341
O75955	FLOT1	Flotillin-1 OS=Homo sapiens OX=9606 GN=FLOT1 PE=1 SV=3 - [FLOT1_HUMAN]	Rare	0.0795455	0.07302
P15408	FOSL2	Fos-related antigen 2 OS=Homo sapiens OX=9606 GN=FOSL2 PE=1 SV=1 - [FOSL2_HUMAN]	Rare	0.0795455	0.07302
Q9NQX3	GPHN	Gephyrin OS=Homo sapiens OX=9606 GN=GPHN PE=1 SV=1 - [GEPH_HUMAN]	Rare	0.0795455	0.07283
Q5S007	LRRK2	Leucine-rich repeat serine/threonine-protein kinase 2 OS=Homo sapiens OX=9606 GN=LRRK2 PE=1 SV=2 - [LRRK2_HUMAN]	Rare	0.0795455	0.07244
Q9P225	DNAH2	Dynein heavy chain 2, axonemal OS=Homo sapiens OX=9606 GN=DNAH2 PE=1 SV=3 - [DYH2_HUMAN]	Rare	0.0795455	0.07244
O15061	SYNM	Synemin OS=Homo sapiens OX=9606 GN=SYNM PE=1 SV=2 - [SYNEM_HUMAN]	Rare	0.0795455	0.07199
Q70UQ0	IKBIP	Inhibitor of nuclear factor kappa-B kinase-interacting protein OS=Homo sapiens OX=9606 GN=IKBIP PE=1 SV=1 - [IKIP_HUMAN]	Rare	0.0795455	0.07173
Q7Z5N4	SDK1	Protein sidekick-1 OS=Homo sapiens OX=9606 GN=SDK1 PE=2 SV=3 - [SDK1_HUMAN]	Rare	0.0795455	0.07173
P55061	TMBIM6	Bax inhibitor 1 OS=Homo sapiens OX=9606 GN=TMBIM6 PE=1 SV=2 - [BI1_HUMAN]	Rare	0.0795455	0.07167
O15354	GPR37	Prosaposin receptor GPR37 OS=Homo sapiens OX=9606 GN=GPR37 PE=1 SV=2 - [GPR37_HUMAN]	Rare	0.0795455	0.07038
P15907	ST6GAL1	Beta-galactoside alpha-2,6-sialyltransferase 1 OS=Homo sapiens OX=9606 GN=ST6GAL1 PE=1 SV=1 - [SIAT1_HUMAN]	Rare	0.0795455	0.07038
Q9UMX6	GUCA1B	Guanylyl cyclase-activating protein 2 OS=Homo sapiens OX=9606 GN=GUCA1B PE=1 SV=4 - [GUC1B_HUMAN]	Rare	0.0795455	0.07005
P0C091	FREM3	FRAS1-related extracellular matrix protein 3 OS=Homo sapiens OX=9606 GN=FREM3 PE=3 SV=2 - [FREM3_HUMAN]	Rare	0.0795455	0.06993
O75717	WDHD1	WD repeat and HMG-box DNA-binding protein 1 OS=Homo sapiens OX=9606 GN=WDHD1 PE=1 SV=1 - [WDHD1_HUMAN]	Rare	0.0795455	0.06921
Q96RL7	VPS13A	Vacuolar protein sorting-associated protein 13A OS=Homo sapiens OX=9606 GN=VPS13A PE=1 SV=2 - [VP13A_HUMAN]	Rare	0.0795455	0.06921
Q13616	CUL1	Cullin-1 OS=Homo sapiens OX=9606 GN=CUL1 PE=1 SV=2 - [CUL1_HUMAN]	Rare	0.0795455	0.06909
Q86T82	USP37	Ubiquitin carboxyl-terminal hydrolase 37 OS=Homo sapiens OX=9606 GN=USP37 PE=1 SV=2 - [UBP37_HUMAN]	Rare	0.0795455	0.06902
P51530	DNA2	DNA replication ATP-dependent helicase/nuclease DNA2 OS=Homo sapiens OX=9606 GN=DNA2 PE=1 SV=3 - [DNA2_HUMAN]	Rare	0.0795455	0.06844
O75165	DNAJC13	DnaJ homolog subfamily C member 13 OS=Homo sapiens OX=9606 GN=DNAJC13 PE=1 SV=5 - [DJC13_HUMAN]	Rare	0.0795455	0.06831
Q08AM6	VAC14	Protein VAC14 homolog OS=Homo sapiens OX=9606 GN=VAC14 PE=1 SV=1 - [VAC14_HUMAN]	Rare	0.0795455	0.06805
P46100	ATRX	Transcriptional regulator ATRX OS=Homo sapiens OX=9606 GN=ATRX PE=1 SV=5 - [ATRX_HUMAN]	Rare	0.0795455	0.0676
Q6UWR7	ENPP6	Glycerophosphocholine cholinephosphodiesterase ENPP6 OS=Homo sapiens OX=9606 GN=ENPP6 PE=1 SV=2 - [ENPP6_HUMAN]	Rare	0.0795455	0.0676
Q9UIU6	SIX4	Homeobox protein SIX4 OS=Homo sapiens OX=9606 GN=SIX4 PE=1 SV=2 - [SIX4_HUMAN]	Rare	0.0795455	0.06715
Q08116	RGS1	Regulator of G-protein signaling 1 OS=Homo sapiens OX=9606 GN=RGS1 PE=1 SV=3 - [RGS1_HUMAN]	Rare	0.0795455	0.06637
Q9BX70	BTBD2	BTB/POZ domain-containing protein 2 OS=Homo sapiens OX=9606 GN=BTBD2 PE=1 SV=1 - [BTBD2_HUMAN]	Rare	0.0795455	0.06624
O75417	POLQ	DNA polymerase theta OS=Homo sapiens OX=9606 GN=POLQ PE=1 SV=2 - [DPOLQ_HUMAN]	Rare	0.0795455	0.06547
P31431	SDC4	Syndecan-4 OS=Homo sapiens OX=9606 GN=SDC4 PE=1 SV=2 - [SDC4_HUMAN]	Rare	0.0795455	0.06515
Q9NVE4	CCDC87	Coiled-coil domain-containing protein 87 OS=Homo sapiens OX=9606 GN=CCDC87 PE=1 SV=2 - [CCD87_HUMAN]	Rare	0.0795455	0.06431
P52735	VAV2	Guanine nucleotide exchange factor VAV2 OS=Homo sapiens OX=9606 GN=VAV2 PE=1 SV=2 - [VAV2_HUMAN]	Rare	0.0795455	0.06411
Q7Z7E8	UBE2Q1	Ubiquitin-conjugating enzyme E2 Q1 OS=Homo sapiens OX=9606 GN=UBE2Q1 PE=1 SV=1 - [UB2Q1_HUMAN]	Rare	0.0795455	0.06392
Q13547	HDAC1	Histone deacetylase 1 OS=Homo sapiens OX=9606 GN=HDAC1 PE=1 SV=1 - [HDAC1_HUMAN]	Rare	0.0795455	0.06373
Q9NQ35	NRIP3	Nuclear receptor-interacting protein 3 OS=Homo sapiens OX=9606 GN=NRIP3 PE=1 SV=1 - [NRIP3_HUMAN]	Rare	0.0795455	0.06327
P58743	SLC26A5	Prestin OS=Homo sapiens OX=9606 GN=SLC26A5 PE=1 SV=1 - [S26A5_HUMAN]	Rare	0.0795455	0.06308
Q92736	RYR2	Ryanodine receptor 2 OS=Homo sapiens OX=9606 GN=RYR2 PE=1 SV=3 - [RYR2_HUMAN]	Rare	0.0795455	0.0625
Q96Q91	SLC4A9	Anion exchange protein 4 OS=Homo sapiens OX=9606 GN=SLC4A9 PE=2 SV=2 - [B3A4_HUMAN]	Rare	0.0795455	0.0625
O14830	PPEF2	Serine/threonine-protein phosphatase with EF-hands 2 OS=Homo sapiens OX=9606 GN=PPEF2 PE=1 SV=2 - [PPE2_HUMAN]	Rare	0.0795455	0.06224
Q8WZ74	CTTNBP2	Cortactin-binding protein 2 OS=Homo sapiens OX=9606 GN=CTTNBP2 PE=1 SV=1 - [CTTB2_HUMAN]	Rare	0.0795455	0.06173
Q14004	CDK13	Cyclin-dependent kinase 13 OS=Homo sapiens OX=9606 GN=CDK13 PE=1 SV=2 - [CDK13_HUMAN]	Rare	0.0795455	0.06134
O75525	KHDRBS3	KH domain-containing, RNA-binding, signal transduction-associated protein 3 OS=Homo sapiens OX=9606 GN=KHDRBS3 PE=1 SV=1 - [KHDR3_HUMAN]	Rare	0.0795455	0.06063
Q96JM2	ZNF462	Zinc finger protein 462 OS=Homo sapiens OX=9606 GN=ZNF462 PE=1 SV=3 - [ZN462_HUMAN]	Rare	0.0795455	0.05888
Q9NUQ6	SPATS2L	SPATS2-like protein OS=Homo sapiens OX=9606 GN=SPATS2L PE=1 SV=2 - [SPS2L_HUMAN]	Rare	0.0795455	0.05888
Q8IY85	EFCAB13	EF-hand calcium-binding domain-containing protein 13 OS=Homo sapiens OX=9606 GN=EFCAB13 PE=2 SV=2 - [EFC13_HUMAN]	Rare	0.0795455	0.05785
Q99538	LGMN	Legumain OS=Homo sapiens OX=9606 GN=LGMN PE=1 SV=1 - [LGMN_HUMAN]	Rare	0.0795455	0.05733
Q2KHT3	CLEC16A	Protein CLEC16A OS=Homo sapiens OX=9606 GN=CLEC16A PE=1 SV=2 - [CL16A_HUMAN]	Rare	0.0795455	0.05579
Q5XKE5	KRT79	Keratin, type II cytoskeletal 79 OS=Homo sapiens OX=9606 GN=KRT79 PE=1 SV=2 - [K2C79_HUMAN]	Rare	0.0681818	1.27628
P35579	MYH9	Myosin-9 OS=Homo sapiens OX=9606 GN=MYH9 PE=1 SV=4 - [MYH9_HUMAN]	Rare	0.0681818	0.61028
P09104	ENO2	Gamma-enolase OS=Homo sapiens OX=9606 GN=ENO2 PE=1 SV=3 - [ENOG_HUMAN]	Rare	0.0681818	0.42033
Q5T749	KPRP	Keratinocyte proline-rich protein OS=Homo sapiens OX=9606 GN=KPRP PE=1 SV=1 - [KPRP_HUMAN]	Rare	0.0681818	0.24613
P0DJI8	SAA1	Serum amyloid A-1 protein OS=Homo sapiens OX=9606 GN=SAA1 PE=1 SV=1 - [SAA1_HUMAN]	Rare	0.0681818	0.23334
Q8N1N4	KRT78	Keratin, type II cytoskeletal 78 OS=Homo sapiens OX=9606 GN=KRT78 PE=1 SV=2 - [K2C78_HUMAN]	Rare	0.0681818	0.22585
A8MW99	MEI4	Meiosis-specific protein MEI4 OS=Homo sapiens OX=9606 GN=MEI4 PE=1 SV=2 - [MEI4_HUMAN]	Rare	0.0681818	0.22314
P80748	IGLV3-21	Immunoglobulin lambda variable 3-21 OS=Homo sapiens OX=9606 GN=IGLV3-21 PE=1 SV=2 - [LV321_HUMAN]	Rare	0.0681818	0.21216
P42658	DPP6	Dipeptidyl aminopeptidase-like protein 6 OS=Homo sapiens OX=9606 GN=DPP6 PE=1 SV=2 - [DPP6_HUMAN]	Rare	0.0681818	0.17465
Q9BY50	SEC11C	Signal peptidase complex catalytic subunit SEC11C OS=Homo sapiens OX=9606 GN=SEC11C PE=1 SV=3 - [SC11C_HUMAN]	Rare	0.0681818	0.16529
Q9HAV4	XPO5	Exportin-5 OS=Homo sapiens OX=9606 GN=XPO5 PE=1 SV=1 - [XPO5_HUMAN]	Rare	0.0681818	0.15638
O00291	HIP1	Huntingtin-interacting protein 1 OS=Homo sapiens OX=9606 GN=HIP1 PE=1 SV=5 - [HIP1_HUMAN]	Rare	0.0681818	0.15244
Q8IVF7	FMNL3	Formin-like protein 3 OS=Homo sapiens OX=9606 GN=FMNL3 PE=1 SV=3 - [FMNL3_HUMAN]	Rare	0.0681818	0.14902
P04003	C4BPA	C4b-binding protein alpha chain OS=Homo sapiens OX=9606 GN=C4BPA PE=1 SV=2 - [C4BPA_HUMAN]	Rare	0.0681818	0.14573
Q96N67	DOCK7	Dedicator of cytokinesis protein 7 OS=Homo sapiens OX=9606 GN=DOCK7 PE=1 SV=4 - [DOCK7_HUMAN]	Rare	0.0681818	0.14411
Q14CB8	ARHGAP19	Rho GTPase-activating protein 19 OS=Homo sapiens OX=9606 GN=ARHGAP19 PE=1 SV=1 - [RHG19_HUMAN]	Rare	0.0681818	0.14288
P61647	ST8SIA6	Alpha-2,8-sialyltransferase 8F OS=Homo sapiens OX=9606 GN=ST8SIA6 PE=2 SV=1 - [SIA8F_HUMAN]	Rare	0.0681818	0.13462
P46108	CRK	Adapter molecule crk OS=Homo sapiens OX=9606 GN=CRK PE=1 SV=2 - [CRK_HUMAN]	Rare	0.0681818	0.13326
P35611	ADD1	Alpha-adducin OS=Homo sapiens OX=9606 GN=ADD1 PE=1 SV=2 - [ADDA_HUMAN]	Rare	0.0681818	0.13081
Q15517	CDSN	Corneodesmosin OS=Homo sapiens OX=9606 GN=CDSN PE=1 SV=3 - [CDSN_HUMAN]	Rare	0.0681818	0.13055
O14827	RASGRF2	Ras-specific guanine nucleotide-releasing factor 2 OS=Homo sapiens OX=9606 GN=RASGRF2 PE=1 SV=2 - [RGRF2_HUMAN]	Rare	0.0681818	0.12849
Q8WWM9	CYGB	Cytoglobin OS=Homo sapiens OX=9606 GN=CYGB PE=1 SV=1 - [CYGB_HUMAN]	Rare	0.0681818	0.12661
P02511	CRYAB	Alpha-crystallin B chain OS=Homo sapiens OX=9606 GN=CRYAB PE=1 SV=2 - [CRYAB_HUMAN]	Rare	0.0681818	0.12435
P18583	SON	Protein SON OS=Homo sapiens OX=9606 GN=SON PE=1 SV=4 - [SON_HUMAN]	Rare	0.0681818	0.12397
Q5T5C0	STXBP5	Syntaxin-binding protein 5 OS=Homo sapiens OX=9606 GN=STXBP5 PE=1 SV=1 - [STXB5_HUMAN]	Rare	0.0681818	0.12339
Q9UGJ0	PRKAG2	5'-AMP-activated protein kinase subunit gamma-2 OS=Homo sapiens OX=9606 GN=PRKAG2 PE=1 SV=1 - [AAKG2_HUMAN]	Rare	0.0681818	0.12222
Q9NUE0	ZDHHC18	Palmitoyltransferase ZDHHC18 OS=Homo sapiens OX=9606 GN=ZDHHC18 PE=1 SV=2 - [ZDH18_HUMAN]	Rare	0.0681818	0.12048
P51991	HNRNPA3	Heterogeneous nuclear ribonucleoprotein A3 OS=Homo sapiens OX=9606 GN=HNRNPA3 PE=1 SV=2 - [ROA3_HUMAN]	Rare	0.0681818	0.1168
Q8NCM8	DYNC2H1	Cytoplasmic dynein 2 heavy chain 1 OS=Homo sapiens OX=9606 GN=DYNC2H1 PE=1 SV=4 - [DYHC2_HUMAN]	Rare	0.0681818	0.11519
Q9UFH2	DNAH17	Dynein heavy chain 17, axonemal OS=Homo sapiens OX=9606 GN=DNAH17 PE=1 SV=3 - [DYH17_HUMAN]	Rare	0.0681818	0.11247
Q96B26	EXOSC8	Exosome complex component RRP43 OS=Homo sapiens OX=9606 GN=EXOSC8 PE=1 SV=1 - [EXOS8_HUMAN]	Rare	0.0681818	0.11189
Q92482	AQP3	Aquaporin-3 OS=Homo sapiens OX=9606 GN=AQP3 PE=1 SV=2 - [AQP3_HUMAN]	Rare	0.0681818	0.1095
P55268	LAMB2	Laminin subunit beta-2 OS=Homo sapiens OX=9606 GN=LAMB2 PE=1 SV=2 - [LAMB2_HUMAN]	Rare	0.0681818	0.10821
Q8WXD9	CASKIN1	Caskin-1 OS=Homo sapiens OX=9606 GN=CASKIN1 PE=1 SV=1 - [CSKI1_HUMAN]	Rare	0.0681818	0.10744
Q7Z4N8	P4HA3	Prolyl 4-hydroxylase subunit alpha-3 OS=Homo sapiens OX=9606 GN=P4HA3 PE=1 SV=1 - [P4HA3_HUMAN]	Rare	0.0681818	0.10718
Q9ULM3	YEATS2	YEATS domain-containing protein 2 OS=Homo sapiens OX=9606 GN=YEATS2 PE=1 SV=2 - [YETS2_HUMAN]	Rare	0.0681818	0.10576
Q8NE09	RGS22	Regulator of G-protein signaling 22 OS=Homo sapiens OX=9606 GN=RGS22 PE=1 SV=3 - [RGS22_HUMAN]	Rare	0.0681818	0.10176
Q8IWZ3	ANKHD1	Ankyrin repeat and KH domain-containing protein 1 OS=Homo sapiens OX=9606 GN=ANKHD1 PE=1 SV=1 - [ANKH1_HUMAN]	Rare	0.0681818	0.10105
A6NE01	FAM186A	Protein FAM186A OS=Homo sapiens OX=9606 GN=FAM186A PE=2 SV=3 - [F186A_HUMAN]	Rare	0.0681818	0.10066
Q8NDA2	HMCN2	Hemicentin-2 OS=Homo sapiens OX=9606 GN=HMCN2 PE=2 SV=3 - [HMCN2_HUMAN]	Rare	0.0681818	0.10046
O76082	SLC22A5	Solute carrier family 22 member 5 OS=Homo sapiens OX=9606 GN=SLC22A5 PE=1 SV=1 - [S22A5_HUMAN]	Rare	0.0681818	0.10034
O94915	FRYL	Protein furry homolog-like OS=Homo sapiens OX=9606 GN=FRYL PE=1 SV=2 - [FRYL_HUMAN]	Rare	0.0681818	0.09911
Q86V15	CASZ1	Zinc finger protein castor homolog 1 OS=Homo sapiens OX=9606 GN=CASZ1 PE=1 SV=4 - [CASZ1_HUMAN]	Rare	0.0681818	0.09827
Q7L622	G2E3	G2/M phase-specific E3 ubiquitin-protein ligase OS=Homo sapiens OX=9606 GN=G2E3 PE=1 SV=1 - [G2E3_HUMAN]	Rare	0.0681818	0.09691
P08514	ITGA2B	Integrin alpha-IIb OS=Homo sapiens OX=9606 GN=ITGA2B PE=1 SV=3 - [ITA2B_HUMAN]	Rare	0.0681818	0.09595
Q5UIP0	RIF1	Telomere-associated protein RIF1 OS=Homo sapiens OX=9606 GN=RIF1 PE=1 SV=2 - [RIF1_HUMAN]	Rare	0.0681818	0.09427
P46721	SLCO1A2	Solute carrier organic anion transporter family member 1A2 OS=Homo sapiens OX=9606 GN=SLCO1A2 PE=2 SV=1 - [SO1A2_HUMAN]	Rare	0.0681818	0.09394
Q9H0J4	QRICH2	Glutamine-rich protein 2 OS=Homo sapiens OX=9606 GN=QRICH2 PE=1 SV=1 - [QRIC2_HUMAN]	Rare	0.0681818	0.09381
A6NNF4	ZNF726	Zinc finger protein 726 OS=Homo sapiens OX=9606 GN=ZNF726 PE=1 SV=4 - [ZN726_HUMAN]	Rare	0.0681818	0.09369
Q8N5R6	CCDC33	Coiled-coil domain-containing protein 33 OS=Homo sapiens OX=9606 GN=CCDC33 PE=1 SV=3 - [CCD33_HUMAN]	Rare	0.0681818	0.09298
Q9H2D1	SLC25A32	Mitochondrial folate transporter/carrier OS=Homo sapiens OX=9606 GN=SLC25A32 PE=1 SV=2 - [MFTC_HUMAN]	Rare	0.0681818	0.09285
Q92667	AKAP1	A-kinase anchor protein 1, mitochondrial OS=Homo sapiens OX=9606 GN=AKAP1 PE=1 SV=1 - [AKAP1_HUMAN]	Rare	0.0681818	0.09246
Q8NEA6	GLIS3	Zinc finger protein GLIS3 OS=Homo sapiens OX=9606 GN=GLIS3 PE=1 SV=5 - [GLIS3_HUMAN]	Rare	0.0681818	0.09233
Q9UQF0	ERVW-1	Syncytin-1 OS=Homo sapiens OX=9606 GN=ERVW-1 PE=1 SV=1 - [SYCY1_HUMAN]	Rare	0.0681818	0.09181
Q8N2H4	SYS1	Protein SYS1 homolog OS=Homo sapiens OX=9606 GN=SYS1 PE=1 SV=1 - [SYS1_HUMAN]	Rare	0.0681818	0.09175
Q8IZ21	PHACTR4	Phosphatase and actin regulator 4 OS=Homo sapiens OX=9606 GN=PHACTR4 PE=1 SV=1 - [PHAR4_HUMAN]	Rare	0.0681818	0.09143
Q9H3S5	PIGM	GPI mannosyltransferase 1 OS=Homo sapiens OX=9606 GN=PIGM PE=1 SV=1 - [PIGM_HUMAN]	Rare	0.0681818	0.09117
Q05707	COL14A1	Collagen alpha-1(XIV) chain OS=Homo sapiens OX=9606 GN=COL14A1 PE=1 SV=3 - [COEA1_HUMAN]	Rare	0.0681818	0.09072
Q9ULI3	HEG1	Protein HEG homolog 1 OS=Homo sapiens OX=9606 GN=HEG1 PE=1 SV=3 - [HEG1_HUMAN]	Rare	0.0681818	0.0902
Q6W4X9	MUC6	Mucin-6 OS=Homo sapiens OX=9606 GN=MUC6 PE=1 SV=3 - [MUC6_HUMAN]	Rare	0.0681818	0.09013
O60503	ADCY9	Adenylate cyclase type 9 OS=Homo sapiens OX=9606 GN=ADCY9 PE=1 SV=4 - [ADCY9_HUMAN]	Rare	0.0681818	0.08988
Q9UQ03	CORO2B	Coronin-2B OS=Homo sapiens OX=9606 GN=CORO2B PE=1 SV=4 - [COR2B_HUMAN]	Rare	0.0681818	0.08975
Q9Y2K3	MYH15	Myosin-15 OS=Homo sapiens OX=9606 GN=MYH15 PE=1 SV=5 - [MYH15_HUMAN]	Rare	0.0681818	0.08936
Q86TB3	ALPK2	Alpha-protein kinase 2 OS=Homo sapiens OX=9606 GN=ALPK2 PE=1 SV=3 - [ALPK2_HUMAN]	Rare	0.0681818	0.08871
Q12789	GTF3C1	General transcription factor 3C polypeptide 1 OS=Homo sapiens OX=9606 GN=GTF3C1 PE=1 SV=4 - [TF3C1_HUMAN]	Rare	0.0681818	0.08858
Q6UXB8	PI16	Peptidase inhibitor 16 OS=Homo sapiens OX=9606 GN=PI16 PE=1 SV=1 - [PI16_HUMAN]	Rare	0.0681818	0.08846
Q86UR5	RIMS1	Regulating synaptic membrane exocytosis protein 1 OS=Homo sapiens OX=9606 GN=RIMS1 PE=1 SV=1 - [RIMS1_HUMAN]	Rare	0.0681818	0.08833
P23083	IGHV1-2	Immunoglobulin heavy variable 1-2 OS=Homo sapiens OX=9606 GN=IGHV1-2 PE=1 SV=2 - [HV102_HUMAN]	Rare	0.0681818	0.08826
Q9H2K2	TNKS2	Poly [ADP-ribose] polymerase tankyrase-2 OS=Homo sapiens OX=9606 GN=TNKS2 PE=1 SV=1 - [TNKS2_HUMAN]	Rare	0.0681818	0.08813
Q05586	GRIN1	Glutamate receptor ionotropic, NMDA 1 OS=Homo sapiens OX=9606 GN=GRIN1 PE=1 SV=1 - [NMDZ1_HUMAN]	Rare	0.0681818	0.08781
Q5JRV8	TMEM255A	Transmembrane protein 255A OS=Homo sapiens OX=9606 GN=TMEM255A PE=2 SV=1 - [T255A_HUMAN]	Rare	0.0681818	0.08742
Q8IVU3	HERC6	Probable E3 ubiquitin-protein ligase HERC6 OS=Homo sapiens OX=9606 GN=HERC6 PE=1 SV=2 - [HERC6_HUMAN]	Rare	0.0681818	0.08736
Q8TDW7	FAT3	Protocadherin Fat 3 OS=Homo sapiens OX=9606 GN=FAT3 PE=2 SV=3 - [FAT3_HUMAN]	Rare	0.0681818	0.08729
Q02817	MUC2	Mucin-2 OS=Homo sapiens OX=9606 GN=MUC2 PE=1 SV=2 - [MUC2_HUMAN]	Rare	0.0681818	0.08613
P46019	PHKA2	Phosphorylase b kinase regulatory subunit alpha, liver isoform OS=Homo sapiens OX=9606 GN=PHKA2 PE=1 SV=1 - [KPB2_HUMAN]	Rare	0.0681818	0.08497
P15822	HIVEP1	Zinc finger protein 40 OS=Homo sapiens OX=9606 GN=HIVEP1 PE=1 SV=3 - [ZEP1_HUMAN]	Rare	0.0681818	0.08419
Q5TAH2	SLC9C2	Sodium/hydrogen exchanger 11 OS=Homo sapiens OX=9606 GN=SLC9C2 PE=2 SV=1 - [SL9C2_HUMAN]	Rare	0.0681818	0.08374
Q9Y3S1	WNK2	Serine/threonine-protein kinase WNK2 OS=Homo sapiens OX=9606 GN=WNK2 PE=1 SV=4 - [WNK2_HUMAN]	Rare	0.0681818	0.08368
Q9UBX1	CTSF	Cathepsin F OS=Homo sapiens OX=9606 GN=CTSF PE=1 SV=1 - [CATF_HUMAN]	Rare	0.0681818	0.08323
Q9NR20	DYRK4	Dual specificity tyrosine-phosphorylation-regulated kinase 4 OS=Homo sapiens OX=9606 GN=DYRK4 PE=1 SV=2 - [DYRK4_HUMAN]	Rare	0.0681818	0.08316
P60228	EIF3E	Eukaryotic translation initiation factor 3 subunit E OS=Homo sapiens OX=9606 GN=EIF3E PE=1 SV=1 - [EIF3E_HUMAN]	Rare	0.0681818	0.08303
P48664	SLC1A6	Excitatory amino acid transporter 4 OS=Homo sapiens OX=9606 GN=SLC1A6 PE=2 SV=1 - [EAA4_HUMAN]	Rare	0.0681818	0.08284
P28749	RBL1	Retinoblastoma-like protein 1 OS=Homo sapiens OX=9606 GN=RBL1 PE=1 SV=3 - [RBL1_HUMAN]	Rare	0.0681818	0.08277
Q9UKZ4	TENM1	Teneurin-1 OS=Homo sapiens OX=9606 GN=TENM1 PE=1 SV=2 - [TEN1_HUMAN]	Rare	0.0681818	0.08245
P25054	APC	Adenomatous polyposis coli protein OS=Homo sapiens OX=9606 GN=APC PE=1 SV=2 - [APC_HUMAN]	Rare	0.0681818	0.08239
Q9UPX8	SHANK2	SH3 and multiple ankyrin repeat domains protein 2 OS=Homo sapiens OX=9606 GN=SHANK2 PE=1 SV=3 - [SHAN2_HUMAN]	Rare	0.0681818	0.08206
O60469	DSCAM	Down syndrome cell adhesion molecule OS=Homo sapiens OX=9606 GN=DSCAM PE=1 SV=2 - [DSCAM_HUMAN]	Rare	0.0681818	0.08193
P03952	KLKB1	Plasma kallikrein OS=Homo sapiens OX=9606 GN=KLKB1 PE=1 SV=1 - [KLKB1_HUMAN]	Rare	0.0681818	0.08161
Q8TDF6	RASGRP4	RAS guanyl-releasing protein 4 OS=Homo sapiens OX=9606 GN=RASGRP4 PE=1 SV=2 - [GRP4_HUMAN]	Rare	0.0681818	0.08084
O95425	SVIL	Supervillin OS=Homo sapiens OX=9606 GN=SVIL PE=1 SV=2 - [SVIL_HUMAN]	Rare	0.0681818	0.08077
P04275	VWF	von Willebrand factor OS=Homo sapiens OX=9606 GN=VWF PE=1 SV=4 - [VWF_HUMAN]	Rare	0.0681818	0.08071
O14497	ARID1A	AT-rich interactive domain-containing protein 1A OS=Homo sapiens OX=9606 GN=ARID1A PE=1 SV=3 - [ARI1A_HUMAN]	Rare	0.0681818	0.08013
Q9UQB9	AURKC	Aurora kinase C OS=Homo sapiens OX=9606 GN=AURKC PE=1 SV=1 - [AURKC_HUMAN]	Rare	0.0681818	0.07961
Q5VU97	CACHD1	VWFA and cache domain-containing protein 1 OS=Homo sapiens OX=9606 GN=CACHD1 PE=2 SV=2 - [CAHD1_HUMAN]	Rare	0.0681818	0.07935
P23515	OMG	Oligodendrocyte-myelin glycoprotein OS=Homo sapiens OX=9606 GN=OMG PE=1 SV=2 - [OMGP_HUMAN]	Rare	0.0681818	0.07929
Q6PJF5	RHBDF2	Inactive rhomboid protein 2 OS=Homo sapiens OX=9606 GN=RHBDF2 PE=1 SV=2 - [RHDF2_HUMAN]	Rare	0.0681818	0.07916
Q13459	MYO9B	Unconventional myosin-IXb OS=Homo sapiens OX=9606 GN=MYO9B PE=1 SV=3 - [MYO9B_HUMAN]	Rare	0.0681818	0.07909
Q13201	MMRN1	Multimerin-1 OS=Homo sapiens OX=9606 GN=MMRN1 PE=1 SV=3 - [MMRN1_HUMAN]	Rare	0.0681818	0.07884
Q9BXW6	OSBPL1A	Oxysterol-binding protein-related protein 1 OS=Homo sapiens OX=9606 GN=OSBPL1A PE=1 SV=2 - [OSBL1_HUMAN]	Rare	0.0681818	0.07884
O95405	ZFYVE9	Zinc finger FYVE domain-containing protein 9 OS=Homo sapiens OX=9606 GN=ZFYVE9 PE=1 SV=2 - [ZFYV9_HUMAN]	Rare	0.0681818	0.07864
Q8IWJ2	GCC2	GRIP and coiled-coil domain-containing protein 2 OS=Homo sapiens OX=9606 GN=GCC2 PE=1 SV=4 - [GCC2_HUMAN]	Rare	0.0681818	0.07864
Q14940	SLC9A5	Sodium/hydrogen exchanger 5 OS=Homo sapiens OX=9606 GN=SLC9A5 PE=1 SV=2 - [SL9A5_HUMAN]	Rare	0.0681818	0.07838
Q6P2E9	EDC4	Enhancer of mRNA-decapping protein 4 OS=Homo sapiens OX=9606 GN=EDC4 PE=1 SV=1 - [EDC4_HUMAN]	Rare	0.0681818	0.07838
Q05C16	LRRC63	Leucine-rich repeat-containing protein 63 OS=Homo sapiens OX=9606 GN=LRRC63 PE=2 SV=2 - [LRC63_HUMAN]	Rare	0.0681818	0.07812
Q6P4R8	NFRKB	Nuclear factor related to kappa-B-binding protein OS=Homo sapiens OX=9606 GN=NFRKB PE=1 SV=2 - [NFRKB_HUMAN]	Rare	0.0681818	0.07806
Q4LDE5	SVEP1	Sushi, von Willebrand factor type A, EGF and pentraxin domain-containing protein 1 OS=Homo sapiens OX=9606 GN=SVEP1 PE=1 SV=3 - [SVEP1_HUMAN]	Rare	0.0681818	0.07754
Q6Q759	SPAG17	Sperm-associated antigen 17 OS=Homo sapiens OX=9606 GN=SPAG17 PE=2 SV=1 - [SPG17_HUMAN]	Rare	0.0681818	0.07754
Q9Y5E1	PCDHB9	Protocadherin beta-9 OS=Homo sapiens OX=9606 GN=PCDHB9 PE=2 SV=2 - [PCDB9_HUMAN]	Rare	0.0681818	0.07754
Q8TEP8	CEP192	Centrosomal protein of 192 kDa OS=Homo sapiens OX=9606 GN=CEP192 PE=1 SV=3 - [CE192_HUMAN]	Rare	0.0681818	0.07677
O60674	JAK2	Tyrosine-protein kinase JAK2 OS=Homo sapiens OX=9606 GN=JAK2 PE=1 SV=2 - [JAK2_HUMAN]	Rare	0.0681818	0.07645
Q96RK0	CIC	Protein capicua homolog OS=Homo sapiens OX=9606 GN=CIC PE=1 SV=2 - [CIC_HUMAN]	Rare	0.0681818	0.07619
O60292	SIPA1L3	Signal-induced proliferation-associated 1-like protein 3 OS=Homo sapiens OX=9606 GN=SIPA1L3 PE=1 SV=3 - [SI1L3_HUMAN]	Rare	0.0681818	0.07599
Q709C8	VPS13C	Vacuolar protein sorting-associated protein 13C OS=Homo sapiens OX=9606 GN=VPS13C PE=1 SV=1 - [VP13C_HUMAN]	Rare	0.0681818	0.07541
Q8N960	CEP120	Centrosomal protein of 120 kDa OS=Homo sapiens OX=9606 GN=CEP120 PE=1 SV=2 - [CE120_HUMAN]	Rare	0.0681818	0.07496
Q70CQ2	USP34	Ubiquitin carboxyl-terminal hydrolase 34 OS=Homo sapiens OX=9606 GN=USP34 PE=1 SV=2 - [UBP34_HUMAN]	Rare	0.0681818	0.07477
A7E2Y1	MYH7B	Myosin-7B OS=Homo sapiens OX=9606 GN=MYH7B PE=1 SV=4 - [MYH7B_HUMAN]	Rare	0.0681818	0.07457
Q6P1X5	TAF2	Transcription initiation factor TFIID subunit 2 OS=Homo sapiens OX=9606 GN=TAF2 PE=1 SV=3 - [TAF2_HUMAN]	Rare	0.0681818	0.07425
Q9UKT6	FBXL21P	Putative F-box/LRR-repeat protein 21 OS=Homo sapiens OX=9606 GN=FBXL21P PE=5 SV=1 - [FXL21_HUMAN]	Rare	0.0681818	0.0738
P52848	NDST1	Bifunctional heparan sulfate N-deacetylase/N-sulfotransferase 1 OS=Homo sapiens OX=9606 GN=NDST1 PE=1 SV=1 - [NDST1_HUMAN]	Rare	0.0681818	0.07367
Q969S8	HDAC10	Polyamine deacetylase HDAC10 OS=Homo sapiens OX=9606 GN=HDAC10 PE=1 SV=1 - [HDA10_HUMAN]	Rare	0.0681818	0.07309
Q9P218	COL20A1	Collagen alpha-1(XX) chain OS=Homo sapiens OX=9606 GN=COL20A1 PE=1 SV=4 - [COKA1_HUMAN]	Rare	0.0681818	0.07277
P08240	SRPRA	Signal recognition particle receptor subunit alpha OS=Homo sapiens OX=9606 GN=SRPRA PE=1 SV=2 - [SRPRA_HUMAN]	Rare	0.0681818	0.07225
B1AJZ9	FHAD1	Forkhead-associated domain-containing protein 1 OS=Homo sapiens OX=9606 GN=FHAD1 PE=2 SV=2 - [FHAD1_HUMAN]	Rare	0.0681818	0.07212
Q5GLZ8	HERC4	Probable E3 ubiquitin-protein ligase HERC4 OS=Homo sapiens OX=9606 GN=HERC4 PE=1 SV=1 - [HERC4_HUMAN]	Rare	0.0681818	0.0718
A0A0B4J1V2	IGHV2-26	Immunoglobulin heavy variable 2-26 OS=Homo sapiens OX=9606 GN=IGHV2-26 PE=3 SV=1 - [HV226_HUMAN]	Rare	0.0681818	0.07109
Q9UI32	GLS2	Glutaminase liver isoform, mitochondrial OS=Homo sapiens OX=9606 GN=GLS2 PE=1 SV=2 - [GLSL_HUMAN]	Rare	0.0681818	0.07089
Q5T1H1	EYS	Protein eyes shut homolog OS=Homo sapiens OX=9606 GN=EYS PE=1 SV=5 - [EYS_HUMAN]	Rare	0.0681818	0.07076
Q6YHU6	THADA	Thyroid adenoma-associated protein OS=Homo sapiens OX=9606 GN=THADA PE=1 SV=1 - [THADA_HUMAN]	Rare	0.0681818	0.0707
Q96RT6	CTAGE1	cTAGE family member 2 OS=Homo sapiens OX=9606 GN=CTAGE1 PE=1 SV=2 - [CTGE2_HUMAN]	Rare	0.0681818	0.07012
Q7L2E3	DHX30	ATP-dependent RNA helicase DHX30 OS=Homo sapiens OX=9606 GN=DHX30 PE=1 SV=1 - [DHX30_HUMAN]	Rare	0.0681818	0.06986
O60449	LY75	Lymphocyte antigen 75 OS=Homo sapiens OX=9606 GN=LY75 PE=1 SV=3 - [LY75_HUMAN]	Rare	0.0681818	0.06934
Q7Z2Y8	GVINP1	Interferon-induced very large GTPase 1 OS=Homo sapiens OX=9606 GN=GVINP1 PE=2 SV=2 - [GVIN1_HUMAN]	Rare	0.0681818	0.06934
Q03164	KMT2A	Histone-lysine N-methyltransferase 2A OS=Homo sapiens OX=9606 GN=KMT2A PE=1 SV=5 - [KMT2A_HUMAN]	Rare	0.0681818	0.06921
Q9HBJ7	USP29	Ubiquitin carboxyl-terminal hydrolase 29 OS=Homo sapiens OX=9606 GN=USP29 PE=2 SV=1 - [UBP29_HUMAN]	Rare	0.0681818	0.06915
M0R2J8	DCDC1	Doublecortin domain-containing protein 1 OS=Homo sapiens OX=9606 GN=DCDC1 PE=1 SV=1 - [DCDC1_HUMAN]	Rare	0.0681818	0.06902
Q9BZG8	DPH1	2-(3-amino-3-carboxypropyl)histidine synthase subunit 1 OS=Homo sapiens OX=9606 GN=DPH1 PE=1 SV=2 - [DPH1_HUMAN]	Rare	0.0681818	0.06883
Q9H5P4	PDZD7	PDZ domain-containing protein 7 OS=Homo sapiens OX=9606 GN=PDZD7 PE=1 SV=2 - [PDZD7_HUMAN]	Rare	0.0681818	0.06857
Q460N5	PARP14	Protein mono-ADP-ribosyltransferase PARP14 OS=Homo sapiens OX=9606 GN=PARP14 PE=1 SV=3 - [PAR14_HUMAN]	Rare	0.0681818	0.06818
O75356	ENTPD5	Ectonucleoside triphosphate diphosphohydrolase 5 OS=Homo sapiens OX=9606 GN=ENTPD5 PE=1 SV=1 - [ENTP5_HUMAN]	Rare	0.0681818	0.06805
Q7Z443	PKD1L3	Polycystic kidney disease protein 1-like 3 OS=Homo sapiens OX=9606 GN=PKD1L3 PE=1 SV=1 - [PK1L3_HUMAN]	Rare	0.0681818	0.06792
P08493	MGP	Matrix Gla protein OS=Homo sapiens OX=9606 GN=MGP PE=1 SV=2 - [MGP_HUMAN]	Rare	0.0681818	0.06779
P21731	TBXA2R	Thromboxane A2 receptor OS=Homo sapiens OX=9606 GN=TBXA2R PE=1 SV=3 - [TA2R_HUMAN]	Rare	0.0681818	0.06779
Q5H8C1	FREM1	FRAS1-related extracellular matrix protein 1 OS=Homo sapiens OX=9606 GN=FREM1 PE=1 SV=3 - [FREM1_HUMAN]	Rare	0.0681818	0.06773
Q9NXE4	SMPD4	Sphingomyelin phosphodiesterase 4 OS=Homo sapiens OX=9606 GN=SMPD4 PE=1 SV=3 - [NSMA3_HUMAN]	Rare	0.0681818	0.06773
Q66K14	TBC1D9B	TBC1 domain family member 9B OS=Homo sapiens OX=9606 GN=TBC1D9B PE=1 SV=3 - [TBC9B_HUMAN]	Rare	0.0681818	0.06767
P08581	MET	Hepatocyte growth factor receptor OS=Homo sapiens OX=9606 GN=MET PE=1 SV=4 - [MET_HUMAN]	Rare	0.0681818	0.06734
Q13085	ACACA	Acetyl-CoA carboxylase 1 OS=Homo sapiens OX=9606 GN=ACACA PE=1 SV=2 - [ACACA_HUMAN]	Rare	0.0681818	0.06715
Q92817	EVPL	Envoplakin OS=Homo sapiens OX=9606 GN=EVPL PE=1 SV=3 - [EVPL_HUMAN]	Rare	0.0681818	0.06663
Q5TH69	ARFGEF3	Brefeldin A-inhibited guanine nucleotide-exchange protein 3 OS=Homo sapiens OX=9606 GN=ARFGEF3 PE=1 SV=3 - [BIG3_HUMAN]	Rare	0.0681818	0.0665
Q5SZQ8	CELF3	CUGBP Elav-like family member 3 OS=Homo sapiens OX=9606 GN=CELF3 PE=1 SV=1 - [CELF3_HUMAN]	Rare	0.0681818	0.06624
O60486	PLXNC1	Plexin-C1 OS=Homo sapiens OX=9606 GN=PLXNC1 PE=1 SV=1 - [PLXC1_HUMAN]	Rare	0.0681818	0.06618
O60575	SPINK4	Serine protease inhibitor Kazal-type 4 OS=Homo sapiens OX=9606 GN=SPINK4 PE=1 SV=1 - [ISK4_HUMAN]	Rare	0.0681818	0.06605
O43149	ZZEF1	Zinc finger ZZ-type and EF-hand domain-containing protein 1 OS=Homo sapiens OX=9606 GN=ZZEF1 PE=1 SV=6 - [ZZEF1_HUMAN]	Rare	0.0681818	0.06579
Q9H211	CDT1	DNA replication factor Cdt1 OS=Homo sapiens OX=9606 GN=CDT1 PE=1 SV=3 - [CDT1_HUMAN]	Rare	0.0681818	0.06566
P11717	IGF2R	Cation-independent mannose-6-phosphate receptor OS=Homo sapiens OX=9606 GN=IGF2R PE=1 SV=3 - [MPRI_HUMAN]	Rare	0.0681818	0.06534
Q96Q04	LMTK3	Serine/threonine-protein kinase LMTK3 OS=Homo sapiens OX=9606 GN=LMTK3 PE=1 SV=2 - [LMTK3_HUMAN]	Rare	0.0681818	0.06508
Q9NW08	POLR3B	DNA-directed RNA polymerase III subunit RPC2 OS=Homo sapiens OX=9606 GN=POLR3B PE=1 SV=2 - [RPC2_HUMAN]	Rare	0.0681818	0.06508
Q9H6A9	PCNX3	Pecanex-like protein 3 OS=Homo sapiens OX=9606 GN=PCNX3 PE=1 SV=2 - [PCX3_HUMAN]	Rare	0.0681818	0.06489
O95602	POLR1A	DNA-directed RNA polymerase I subunit RPA1 OS=Homo sapiens OX=9606 GN=POLR1A PE=1 SV=2 - [RPA1_HUMAN]	Rare	0.0681818	0.06476
P02808	STATH	Statherin OS=Homo sapiens OX=9606 GN=STATH PE=1 SV=2 - [STAT_HUMAN]	Rare	0.0681818	0.06418
P13010	XRCC5	X-ray repair cross-complementing protein 5 OS=Homo sapiens OX=9606 GN=XRCC5 PE=1 SV=3 - [XRCC5_HUMAN]	Rare	0.0681818	0.06418
Q14207	NPAT	Protein NPAT OS=Homo sapiens OX=9606 GN=NPAT PE=1 SV=3 - [NPAT_HUMAN]	Rare	0.0681818	0.06405
Q86UK5	EVC2	Limbin OS=Homo sapiens OX=9606 GN=EVC2 PE=1 SV=1 - [LBN_HUMAN]	Rare	0.0681818	0.06386
P20810	CAST	Calpastatin OS=Homo sapiens OX=9606 GN=CAST PE=1 SV=4 - [ICAL_HUMAN]	Rare	0.0681818	0.06353
Q9Y4B6	DCAF1	DDB1- and CUL4-associated factor 1 OS=Homo sapiens OX=9606 GN=DCAF1 PE=1 SV=3 - [DCAF1_HUMAN]	Rare	0.0681818	0.06276
Q13115	DUSP4	Dual specificity protein phosphatase 4 OS=Homo sapiens OX=9606 GN=DUSP4 PE=1 SV=1 - [DUS4_HUMAN]	Rare	0.0681818	0.06244
O95461	LARGE1	LARGE xylosyl- and glucuronyltransferase 1 OS=Homo sapiens OX=9606 GN=LARGE1 PE=1 SV=1 - [LARG1_HUMAN]	Rare	0.0681818	0.0616
Q13367	AP3B2	AP-3 complex subunit beta-2 OS=Homo sapiens OX=9606 GN=AP3B2 PE=1 SV=2 - [AP3B2_HUMAN]	Rare	0.0681818	0.0614
Q9HCU4	CELSR2	Cadherin EGF LAG seven-pass G-type receptor 2 OS=Homo sapiens OX=9606 GN=CELSR2 PE=1 SV=1 - [CELR2_HUMAN]	Rare	0.0681818	0.06114
Q86VF7	NRAP	Nebulin-related-anchoring protein OS=Homo sapiens OX=9606 GN=NRAP PE=1 SV=2 - [NRAP_HUMAN]	Rare	0.0681818	0.06108
P01189	POMC	Pro-opiomelanocortin OS=Homo sapiens OX=9606 GN=POMC PE=1 SV=2 - [COLI_HUMAN]	Rare	0.0681818	0.06101
Q8WUX1	SLC38A5	Sodium-coupled neutral amino acid transporter 5 OS=Homo sapiens OX=9606 GN=SLC38A5 PE=1 SV=1 - [S38A5_HUMAN]	Rare	0.0681818	0.0605
Q9H2U1	DHX36	ATP-dependent DNA/RNA helicase DHX36 OS=Homo sapiens OX=9606 GN=DHX36 PE=1 SV=2 - [DHX36_HUMAN]	Rare	0.0681818	0.0605
Q5U623	ATF7IP2	Activating transcription factor 7-interacting protein 2 OS=Homo sapiens OX=9606 GN=ATF7IP2 PE=1 SV=2 - [MCAF2_HUMAN]	Rare	0.0681818	0.06037
Q9UPR0	PLCL2	Inactive phospholipase C-like protein 2 OS=Homo sapiens OX=9606 GN=PLCL2 PE=1 SV=2 - [PLCL2_HUMAN]	Rare	0.0681818	0.05992
Q5GH70	XKR9	XK-related protein 9 OS=Homo sapiens OX=9606 GN=XKR9 PE=2 SV=1 - [XKR9_HUMAN]	Rare	0.0681818	0.05966
P46976	GYG1	Glycogenin-1 OS=Homo sapiens OX=9606 GN=GYG1 PE=1 SV=4 - [GLYG_HUMAN]	Rare	0.0681818	0.05888
Q0VAF6	SYCN	Syncollin OS=Homo sapiens OX=9606 GN=SYCN PE=2 SV=1 - [SYCN_HUMAN]	Rare	0.0681818	0.05804
Q9BXB1	LGR4	Leucine-rich repeat-containing G-protein coupled receptor 4 OS=Homo sapiens OX=9606 GN=LGR4 PE=1 SV=2 - [LGR4_HUMAN]	Rare	0.0681818	0.05804
Q9BXF9	TEKT3	Tektin-3 OS=Homo sapiens OX=9606 GN=TEKT3 PE=1 SV=1 - [TEKT3_HUMAN]	Rare	0.0681818	0.05779
O15524	SOCS1	Suppressor of cytokine signaling 1 OS=Homo sapiens OX=9606 GN=SOCS1 PE=1 SV=1 - [SOCS1_HUMAN]	Rare	0.0681818	0.05772
P01706	IGLV2-11	Immunoglobulin lambda variable 2-11 OS=Homo sapiens OX=9606 GN=IGLV2-11 PE=1 SV=2 - [LV211_HUMAN]	Rare	0.0681818	0.05766
Q8N3P4	VPS8	Vacuolar protein sorting-associated protein 8 homolog OS=Homo sapiens OX=9606 GN=VPS8 PE=1 SV=3 - [VPS8_HUMAN]	Rare	0.0681818	0.05727
A6NNC1		Putative POM121-like protein 1-like OS=Homo sapiens OX=9606 PE=5 SV=3 - [P12LL_HUMAN]	Rare	0.0681818	0.0565
Q96PQ7	KLHL5	Kelch-like protein 5 OS=Homo sapiens OX=9606 GN=KLHL5 PE=1 SV=3 - [KLHL5_HUMAN]	Rare	0.0681818	0.05585
Q96T68	SETDB2	Histone-lysine N-methyltransferase SETDB2 OS=Homo sapiens OX=9606 GN=SETDB2 PE=1 SV=2 - [SETB2_HUMAN]	Rare	0.0681818	0.05566
Q567U6	CCDC93	Coiled-coil domain-containing protein 93 OS=Homo sapiens OX=9606 GN=CCDC93 PE=1 SV=2 - [CCD93_HUMAN]	Rare	0.0681818	0.05553
P0CL84	STAG3L2	Putative STAG3-like protein 2 OS=Homo sapiens OX=9606 GN=STAG3L2 PE=5 SV=1 - [ST3L2_HUMAN]	Rare	0.0681818	0.05546
P53675	CLTCL1	Clathrin heavy chain 2 OS=Homo sapiens OX=9606 GN=CLTCL1 PE=1 SV=2 - [CLH2_HUMAN]	Rare	0.0681818	0.0554
Q2M3G4	SHROOM1	Protein Shroom1 OS=Homo sapiens OX=9606 GN=SHROOM1 PE=1 SV=1 - [SHRM1_HUMAN]	Rare	0.0681818	0.05527
Q6P2S7	TTC41P	Putative tetratricopeptide repeat protein 41 OS=Homo sapiens OX=9606 GN=TTC41P PE=5 SV=3 - [TTC41_HUMAN]	Rare	0.0681818	0.05514
Q14146	URB2	Unhealthy ribosome biogenesis protein 2 homolog OS=Homo sapiens OX=9606 GN=URB2 PE=1 SV=2 - [URB2_HUMAN]	Rare	0.0681818	0.05488
Q5SYE7	NHSL1	NHS-like protein 1 OS=Homo sapiens OX=9606 GN=NHSL1 PE=1 SV=2 - [NHSL1_HUMAN]	Rare	0.0681818	0.05475
Q52LW3	ARHGAP29	Rho GTPase-activating protein 29 OS=Homo sapiens OX=9606 GN=ARHGAP29 PE=1 SV=2 - [RHG29_HUMAN]	Rare	0.0681818	0.0543
Q9UBC3	DNMT3B	DNA (cytosine-5)-methyltransferase 3B OS=Homo sapiens OX=9606 GN=DNMT3B PE=1 SV=1 - [DNM3B_HUMAN]	Rare	0.0681818	0.05398
Q00975	CACNA1B	Voltage-dependent N-type calcium channel subunit alpha-1B OS=Homo sapiens OX=9606 GN=CACNA1B PE=1 SV=1 - [CAC1B_HUMAN]	Rare	0.0681818	0.05365
P12111	COL6A3	Collagen alpha-3(VI) chain OS=Homo sapiens OX=9606 GN=COL6A3 PE=1 SV=5 - [CO6A3_HUMAN]	Rare	0.0681818	0.05301
Q8TDL5	BPIFB1	BPI fold-containing family B member 1 OS=Homo sapiens OX=9606 GN=BPIFB1 PE=1 SV=1 - [BPIB1_HUMAN]	Rare	0.0681818	0.05269
Q8NCF5	NFATC2IP	NFATC2-interacting protein OS=Homo sapiens OX=9606 GN=NFATC2IP PE=1 SV=1 - [NF2IP_HUMAN]	Rare	0.0681818	0.05256
Q9NTG1	PKDREJ	Polycystic kidney disease and receptor for egg jelly-related protein OS=Homo sapiens OX=9606 GN=PKDREJ PE=2 SV=2 - [PKDRE_HUMAN]	Rare	0.0681818	0.05204
Q8TEK3	DOT1L	Histone-lysine N-methyltransferase, H3 lysine-79 specific OS=Homo sapiens OX=9606 GN=DOT1L PE=1 SV=3 - [DOT1L_HUMAN]	Rare	0.0681818	0.05185
Q9NRJ4	TULP4	Tubby-related protein 4 OS=Homo sapiens OX=9606 GN=TULP4 PE=1 SV=2 - [TULP4_HUMAN]	Rare	0.0681818	0.05127
Q6ZU64	CFAP65	Cilia- and flagella-associated protein 65 OS=Homo sapiens OX=9606 GN=CFAP65 PE=1 SV=2 - [CFA65_HUMAN]	Rare	0.0681818	0.05056
Q9H0B3	IQCN	IQ domain-containing protein N OS=Homo sapiens OX=9606 GN=IQCN PE=1 SV=1 - [IQCN_HUMAN]	Rare	0.0681818	0.05017
O75473	LGR5	Leucine-rich repeat-containing G-protein coupled receptor 5 OS=Homo sapiens OX=9606 GN=LGR5 PE=1 SV=1 - [LGR5_HUMAN]	Rare	0.0681818	0.04978
Q8IWU5	SULF2	Extracellular sulfatase Sulf-2 OS=Homo sapiens OX=9606 GN=SULF2 PE=1 SV=1 - [SULF2_HUMAN]	Rare	0.0681818	0.04959
Q86UW6	N4BP2	NEDD4-binding protein 2 OS=Homo sapiens OX=9606 GN=N4BP2 PE=1 SV=2 - [N4BP2_HUMAN]	Rare	0.0681818	0.04939
Q03468	ERCC6	DNA excision repair protein ERCC-6 OS=Homo sapiens OX=9606 GN=ERCC6 PE=1 SV=1 - [ERCC6_HUMAN]	Rare	0.0681818	0.0492
Q8N139	ABCA6	ATP-binding cassette sub-family A member 6 OS=Homo sapiens OX=9606 GN=ABCA6 PE=1 SV=2 - [ABCA6_HUMAN]	Rare	0.0681818	0.04849
Q8N3J6	CADM2	Cell adhesion molecule 2 OS=Homo sapiens OX=9606 GN=CADM2 PE=2 SV=1 - [CADM2_HUMAN]	Rare	0.0681818	0.047
Q8N884	CGAS	Cyclic GMP-AMP synthase OS=Homo sapiens OX=9606 GN=CGAS PE=1 SV=2 - [CGAS_HUMAN]	Rare	0.0681818	0.047
Q96C45	ULK4	Serine/threonine-protein kinase ULK4 OS=Homo sapiens OX=9606 GN=ULK4 PE=1 SV=2 - [ULK4_HUMAN]	Rare	0.0681818	0.04655
Q8NAP3	ZBTB38	Zinc finger and BTB domain-containing protein 38 OS=Homo sapiens OX=9606 GN=ZBTB38 PE=1 SV=2 - [ZBT38_HUMAN]	Rare	0.0681818	0.04591
O00767	SCD	Acyl-CoA desaturase OS=Homo sapiens OX=9606 GN=SCD PE=1 SV=2 - [ACOD_HUMAN]	Rare	0.0681818	0.04584
P50454	SERPINH1	Serpin H1 OS=Homo sapiens OX=9606 GN=SERPINH1 PE=1 SV=2 - [SERPH_HUMAN]	Rare	0.0681818	0.04565
O95696	BRD1	Bromodomain-containing protein 1 OS=Homo sapiens OX=9606 GN=BRD1 PE=1 SV=1 - [BRD1_HUMAN]	Rare	0.0681818	0.04552
Q9BRR8	GPATCH1	G patch domain-containing protein 1 OS=Homo sapiens OX=9606 GN=GPATCH1 PE=1 SV=1 - [GPTC1_HUMAN]	Rare	0.0681818	0.04429
Q8WVM8	SCFD1	Sec1 family domain-containing protein 1 OS=Homo sapiens OX=9606 GN=SCFD1 PE=1 SV=4 - [SCFD1_HUMAN]	Rare	0.0681818	0.04352
Q14789	GOLGB1	Golgin subfamily B member 1 OS=Homo sapiens OX=9606 GN=GOLGB1 PE=1 SV=2 - [GOGB1_HUMAN]	Rare	0.0681818	0.04248
P57772	EEFSEC	Selenocysteine-specific elongation factor OS=Homo sapiens OX=9606 GN=EEFSEC PE=1 SV=4 - [SELB_HUMAN]	Rare	0.0681818	0.04184
Q96GW7	BCAN	Brevican core protein OS=Homo sapiens OX=9606 GN=BCAN PE=1 SV=2 - [PGCB_HUMAN]	Rare	0.0681818	0.041
Q9HCJ1	ANKH	Progressive ankylosis protein homolog OS=Homo sapiens OX=9606 GN=ANKH PE=1 SV=2 - [ANKH_HUMAN]	Rare	0.0681818	0.04061
Q09470	KCNA1	Potassium voltage-gated channel subfamily A member 1 OS=Homo sapiens OX=9606 GN=KCNA1 PE=1 SV=2 - [KCNA1_HUMAN]	Rare	0.0681818	0.03842
P26374	CHML	Rab proteins geranylgeranyltransferase component A 2 OS=Homo sapiens OX=9606 GN=CHML PE=1 SV=2 - [RAE2_HUMAN]	Rare	0.0681818	0.03648
P28799	GRN	Progranulin OS=Homo sapiens OX=9606 GN=GRN PE=1 SV=2 - [GRN_HUMAN]	Rare	0.0681818	0.03267
O95678	KRT75	Keratin, type II cytoskeletal 75 OS=Homo sapiens OX=9606 GN=KRT75 PE=1 SV=2 - [K2C75_HUMAN]	Rare	0.0568182	1.01001
Q7Z794	KRT77	Keratin, type II cytoskeletal 1b OS=Homo sapiens OX=9606 GN=KRT77 PE=1 SV=3 - [K2C1B_HUMAN]	Rare	0.0568182	0.59117
Q9NZT1	CALML5	Calmodulin-like protein 5 OS=Homo sapiens OX=9606 GN=CALML5 PE=1 SV=2 - [CALL5_HUMAN]	Rare	0.0568182	0.35647
P19012	KRT15	Keratin, type I cytoskeletal 15 OS=Homo sapiens OX=9606 GN=KRT15 PE=1 SV=3 - [K1C15_HUMAN]	Rare	0.0568182	0.35001
Q99456	KRT12	Keratin, type I cytoskeletal 12 OS=Homo sapiens OX=9606 GN=KRT12 PE=1 SV=1 - [K1C12_HUMAN]	Rare	0.0568182	0.22708
P02730	SLC4A1	Band 3 anion transport protein OS=Homo sapiens OX=9606 GN=SLC4A1 PE=1 SV=3 - [B3AT_HUMAN]	Rare	0.0568182	0.21597
P18669	PGAM1	Phosphoglycerate mutase 1 OS=Homo sapiens OX=9606 GN=PGAM1 PE=1 SV=2 - [PGAM1_HUMAN]	Rare	0.0568182	0.17807
P52746	ZNF142	Zinc finger protein 142 OS=Homo sapiens OX=9606 GN=ZNF142 PE=1 SV=4 - [ZN142_HUMAN]	Rare	0.0568182	0.16916
Q63HK3	ZKSCAN2	Zinc finger protein with KRAB and SCAN domains 2 OS=Homo sapiens OX=9606 GN=ZKSCAN2 PE=1 SV=2 - [ZKSC2_HUMAN]	Rare	0.0568182	0.16032
Q562R1	ACTBL2	Beta-actin-like protein 2 OS=Homo sapiens OX=9606 GN=ACTBL2 PE=1 SV=2 - [ACTBL_HUMAN]	Rare	0.0568182	0.16006
P52434	POLR2H	DNA-directed RNA polymerases I, II, and III subunit RPABC3 OS=Homo sapiens OX=9606 GN=POLR2H PE=1 SV=4 - [RPAB3_HUMAN]	Rare	0.0568182	0.14095
Q9BXM7	PINK1	Serine/threonine-protein kinase PINK1, mitochondrial OS=Homo sapiens OX=9606 GN=PINK1 PE=1 SV=1 - [PINK1_HUMAN]	Rare	0.0568182	0.13849
P49641	MAN2A2	Alpha-mannosidase 2x OS=Homo sapiens OX=9606 GN=MAN2A2 PE=2 SV=3 - [MA2A2_HUMAN]	Rare	0.0568182	0.13223
O15230	LAMA5	Laminin subunit alpha-5 OS=Homo sapiens OX=9606 GN=LAMA5 PE=1 SV=8 - [LAMA5_HUMAN]	Rare	0.0568182	0.12842
O60810	PRAMEF4	PRAME family member 4 OS=Homo sapiens OX=9606 GN=PRAMEF4 PE=2 SV=5 - [PRAM4_HUMAN]	Rare	0.0568182	0.12784
P04430	IGKV1-16	Immunoglobulin kappa variable 1-16 OS=Homo sapiens OX=9606 GN=IGKV1-16 PE=1 SV=2 - [KV116_HUMAN]	Rare	0.0568182	0.1272
P06400	RB1	Retinoblastoma-associated protein OS=Homo sapiens OX=9606 GN=RB1 PE=1 SV=2 - [RB_HUMAN]	Rare	0.0568182	0.12623
Q99650	OSMR	Oncostatin-M-specific receptor subunit beta OS=Homo sapiens OX=9606 GN=OSMR PE=1 SV=1 - [OSMR_HUMAN]	Rare	0.0568182	0.12455
P51798	CLCN7	H(+)/Cl(-) exchange transporter 7 OS=Homo sapiens OX=9606 GN=CLCN7 PE=1 SV=2 - [CLCN7_HUMAN]	Rare	0.0568182	0.12416
A0A075B6S5	IGKV1-27	Immunoglobulin kappa variable 1-27 OS=Homo sapiens OX=9606 GN=IGKV1-27 PE=3 SV=1 - [KV127_HUMAN]	Rare	0.0568182	0.12268
A0A0B4J1Y9	IGHV3-72	Immunoglobulin heavy variable 3-72 OS=Homo sapiens OX=9606 GN=IGHV3-72 PE=3 SV=1 - [HV372_HUMAN]	Rare	0.0568182	0.11983
P42167	TMPO	Lamina-associated polypeptide 2, isoforms beta/gamma OS=Homo sapiens OX=9606 GN=TMPO PE=1 SV=2 - [LAP2B_HUMAN]	Rare	0.0568182	0.11971
P0DP23	CALM1	Calmodulin-1 OS=Homo sapiens OX=9606 GN=CALM1 PE=1 SV=1 - [CALM1_HUMAN]	Rare	0.0568182	0.11932
O75808	CAPN15	Calpain-15 OS=Homo sapiens OX=9606 GN=CAPN15 PE=1 SV=1 - [CAN15_HUMAN]	Rare	0.0568182	0.11854
P22681	CBL	E3 ubiquitin-protein ligase CBL OS=Homo sapiens OX=9606 GN=CBL PE=1 SV=2 - [CBL_HUMAN]	Rare	0.0568182	0.11764
Q9BXA5	SUCNR1	Succinate receptor 1 OS=Homo sapiens OX=9606 GN=SUCNR1 PE=1 SV=2 - [SUCR1_HUMAN]	Rare	0.0568182	0.11396
Q14574	DSC3	Desmocollin-3 OS=Homo sapiens OX=9606 GN=DSC3 PE=1 SV=3 - [DSC3_HUMAN]	Rare	0.0568182	0.11293
Q9H0I9	TKTL2	Transketolase-like protein 2 OS=Homo sapiens OX=9606 GN=TKTL2 PE=2 SV=1 - [TKTL2_HUMAN]	Rare	0.0568182	0.11099
Q7Z2W4	ZC3HAV1	Zinc finger CCCH-type antiviral protein 1 OS=Homo sapiens OX=9606 GN=ZC3HAV1 PE=1 SV=3 - [ZCCHV_HUMAN]	Rare	0.0568182	0.10608
Q8NG92	OR13H1	Olfactory receptor 13H1 OS=Homo sapiens OX=9606 GN=OR13H1 PE=2 SV=1 - [O13H1_HUMAN]	Rare	0.0568182	0.10511
Q96CX2	KCTD12	BTB/POZ domain-containing protein KCTD12 OS=Homo sapiens OX=9606 GN=KCTD12 PE=1 SV=1 - [KCD12_HUMAN]	Rare	0.0568182	0.10298
O95248	SBF1	Myotubularin-related protein 5 OS=Homo sapiens OX=9606 GN=SBF1 PE=1 SV=4 - [MTMR5_HUMAN]	Rare	0.0568182	0.10272
Q7Z6J0	SH3RF1	E3 ubiquitin-protein ligase SH3RF1 OS=Homo sapiens OX=9606 GN=SH3RF1 PE=1 SV=2 - [SH3R1_HUMAN]	Rare	0.0568182	0.09924
O95140	MFN2	Mitofusin-2 OS=Homo sapiens OX=9606 GN=MFN2 PE=1 SV=3 - [MFN2_HUMAN]	Rare	0.0568182	0.09691
P30530	AXL	Tyrosine-protein kinase receptor UFO OS=Homo sapiens OX=9606 GN=AXL PE=1 SV=4 - [UFO_HUMAN]	Rare	0.0568182	0.09646
Q99459	CDC5L	Cell division cycle 5-like protein OS=Homo sapiens OX=9606 GN=CDC5L PE=1 SV=2 - [CDC5L_HUMAN]	Rare	0.0568182	0.0962
Q3KNS1	PTCHD3	Patched domain-containing protein 3 OS=Homo sapiens OX=9606 GN=PTCHD3 PE=1 SV=3 - [PTHD3_HUMAN]	Rare	0.0568182	0.0953
Q9NWU1	OXSM	3-oxoacyl-[acyl-carrier-protein] synthase, mitochondrial OS=Homo sapiens OX=9606 GN=OXSM PE=1 SV=1 - [OXSM_HUMAN]	Rare	0.0568182	0.0953
Q9BT17	MTG1	Mitochondrial ribosome-associated GTPase 1 OS=Homo sapiens OX=9606 GN=MTG1 PE=1 SV=2 - [MTG1_HUMAN]	Rare	0.0568182	0.09504
P02549	SPTA1	Spectrin alpha chain, erythrocytic 1 OS=Homo sapiens OX=9606 GN=SPTA1 PE=1 SV=5 - [SPTA1_HUMAN]	Rare	0.0568182	0.09485
Q96JN8	NEURL4	Neuralized-like protein 4 OS=Homo sapiens OX=9606 GN=NEURL4 PE=1 SV=2 - [NEUL4_HUMAN]	Rare	0.0568182	0.09485
Q9H6N6	MYH16	Putative uncharacterized protein MYH16 OS=Homo sapiens OX=9606 GN=MYH16 PE=1 SV=2 - [MYH16_HUMAN]	Rare	0.0568182	0.09291
Q9UIQ6	LNPEP	Leucyl-cystinyl aminopeptidase OS=Homo sapiens OX=9606 GN=LNPEP PE=1 SV=3 - [LCAP_HUMAN]	Rare	0.0568182	0.09168
O14490	DLGAP1	Disks large-associated protein 1 OS=Homo sapiens OX=9606 GN=DLGAP1 PE=1 SV=1 - [DLGP1_HUMAN]	Rare	0.0568182	0.09155
O75616	ERAL1	GTPase Era, mitochondrial OS=Homo sapiens OX=9606 GN=ERAL1 PE=1 SV=2 - [ERAL1_HUMAN]	Rare	0.0568182	0.09155
Q5TC82	RC3H1	Roquin-1 OS=Homo sapiens OX=9606 GN=RC3H1 PE=1 SV=1 - [RC3H1_HUMAN]	Rare	0.0568182	0.0911
Q9H5I5	PIEZO2	Piezo-type mechanosensitive ion channel component 2 OS=Homo sapiens OX=9606 GN=PIEZO2 PE=1 SV=2 - [PIEZ2_HUMAN]	Rare	0.0568182	0.0911
Q8WWZ4	ABCA10	ATP-binding cassette sub-family A member 10 OS=Homo sapiens OX=9606 GN=ABCA10 PE=2 SV=3 - [ABCAA_HUMAN]	Rare	0.0568182	0.09104
Q92870	APBB2	Amyloid-beta A4 precursor protein-binding family B member 2 OS=Homo sapiens OX=9606 GN=APBB2 PE=1 SV=3 - [APBB2_HUMAN]	Rare	0.0568182	0.09065
Q9NSV4	DIAPH3	Protein diaphanous homolog 3 OS=Homo sapiens OX=9606 GN=DIAPH3 PE=1 SV=4 - [DIAP3_HUMAN]	Rare	0.0568182	0.09065
Q8TDI0	CHD5	Chromodomain-helicase-DNA-binding protein 5 OS=Homo sapiens OX=9606 GN=CHD5 PE=1 SV=1 - [CHD5_HUMAN]	Rare	0.0568182	0.09013
Q15413	RYR3	Ryanodine receptor 3 OS=Homo sapiens OX=9606 GN=RYR3 PE=1 SV=3 - [RYR3_HUMAN]	Rare	0.0568182	0.08949
O75426	FBXO24	F-box only protein 24 OS=Homo sapiens OX=9606 GN=FBXO24 PE=1 SV=2 - [FBX24_HUMAN]	Rare	0.0568182	0.08871
Q8NDY8	TMEM52	Transmembrane protein 52 OS=Homo sapiens OX=9606 GN=TMEM52 PE=2 SV=1 - [TMM52_HUMAN]	Rare	0.0568182	0.08833
Q86VP1	TAX1BP1	Tax1-binding protein 1 OS=Homo sapiens OX=9606 GN=TAX1BP1 PE=1 SV=2 - [TAXB1_HUMAN]	Rare	0.0568182	0.08807
O75094	SLIT3	Slit homolog 3 protein OS=Homo sapiens OX=9606 GN=SLIT3 PE=2 SV=3 - [SLIT3_HUMAN]	Rare	0.0568182	0.08794
Q96JB3	HIC2	Hypermethylated in cancer 2 protein OS=Homo sapiens OX=9606 GN=HIC2 PE=1 SV=2 - [HIC2_HUMAN]	Rare	0.0568182	0.08736
O00555	CACNA1A	Voltage-dependent P/Q-type calcium channel subunit alpha-1A OS=Homo sapiens OX=9606 GN=CACNA1A PE=1 SV=3 - [CAC1A_HUMAN]	Rare	0.0568182	0.08678
P22413	ENPP1	Ectonucleotide pyrophosphatase/phosphodiesterase family member 1 OS=Homo sapiens OX=9606 GN=ENPP1 PE=1 SV=2 - [ENPP1_HUMAN]	Rare	0.0568182	0.08465
Q6ZR08	DNAH12	Dynein heavy chain 12, axonemal OS=Homo sapiens OX=9606 GN=DNAH12 PE=2 SV=2 - [DYH12_HUMAN]	Rare	0.0568182	0.08465
Q8N9R8	SCAI	Protein SCAI OS=Homo sapiens OX=9606 GN=SCAI PE=1 SV=2 - [SCAI_HUMAN]	Rare	0.0568182	0.08452
Q9H7D0	DOCK5	Dedicator of cytokinesis protein 5 OS=Homo sapiens OX=9606 GN=DOCK5 PE=1 SV=3 - [DOCK5_HUMAN]	Rare	0.0568182	0.08394
Q9NSI6	BRWD1	Bromodomain and WD repeat-containing protein 1 OS=Homo sapiens OX=9606 GN=BRWD1 PE=1 SV=4 - [BRWD1_HUMAN]	Rare	0.0568182	0.08387
P12277	CKB	Creatine kinase B-type OS=Homo sapiens OX=9606 GN=CKB PE=1 SV=1 - [KCRB_HUMAN]	Rare	0.0568182	0.08381
P51617	IRAK1	Interleukin-1 receptor-associated kinase 1 OS=Homo sapiens OX=9606 GN=IRAK1 PE=1 SV=2 - [IRAK1_HUMAN]	Rare	0.0568182	0.08374
Q5VU43	PDE4DIP	Myomegalin OS=Homo sapiens OX=9606 GN=PDE4DIP PE=1 SV=3 - [MYOME_HUMAN]	Rare	0.0568182	0.08335
P35499	SCN4A	Sodium channel protein type 4 subunit alpha OS=Homo sapiens OX=9606 GN=SCN4A PE=1 SV=4 - [SCN4A_HUMAN]	Rare	0.0568182	0.08148
Q8IVG5	SAMD9L	Sterile alpha motif domain-containing protein 9-like OS=Homo sapiens OX=9606 GN=SAMD9L PE=1 SV=2 - [SAM9L_HUMAN]	Rare	0.0568182	0.08116
Q6NZY4	ZCCHC8	Zinc finger CCHC domain-containing protein 8 OS=Homo sapiens OX=9606 GN=ZCCHC8 PE=1 SV=2 - [ZCHC8_HUMAN]	Rare	0.0568182	0.08026
Q5VVP1	SPATA31A6	Spermatogenesis-associated protein 31A6 OS=Homo sapiens OX=9606 GN=SPATA31A6 PE=3 SV=1 - [S31A6_HUMAN]	Rare	0.0568182	0.07967
Q8N766	EMC1	ER membrane protein complex subunit 1 OS=Homo sapiens OX=9606 GN=EMC1 PE=1 SV=1 - [EMC1_HUMAN]	Rare	0.0568182	0.07929
Q3SYG4	BBS9	Protein PTHB1 OS=Homo sapiens OX=9606 GN=BBS9 PE=1 SV=1 - [PTHB1_HUMAN]	Rare	0.0568182	0.0789
Q9NZM6	PKD2L2	Polycystic kidney disease 2-like 2 protein OS=Homo sapiens OX=9606 GN=PKD2L2 PE=2 SV=2 - [PK2L2_HUMAN]	Rare	0.0568182	0.0789
Q92538	GBF1	Golgi-specific brefeldin A-resistance guanine nucleotide exchange factor 1 OS=Homo sapiens OX=9606 GN=GBF1 PE=1 SV=2 - [GBF1_HUMAN]	Rare	0.0568182	0.07871
Q9ULK4	MED23	Mediator of RNA polymerase II transcription subunit 23 OS=Homo sapiens OX=9606 GN=MED23 PE=1 SV=2 - [MED23_HUMAN]	Rare	0.0568182	0.07858
Q8IVF4	DNAH10	Dynein heavy chain 10, axonemal OS=Homo sapiens OX=9606 GN=DNAH10 PE=1 SV=4 - [DYH10_HUMAN]	Rare	0.0568182	0.07825
P10636	MAPT	Microtubule-associated protein tau OS=Homo sapiens OX=9606 GN=MAPT PE=1 SV=5 - [TAU_HUMAN]	Rare	0.0568182	0.07819
Q15746	MYLK	Myosin light chain kinase, smooth muscle OS=Homo sapiens OX=9606 GN=MYLK PE=1 SV=4 - [MYLK_HUMAN]	Rare	0.0568182	0.07813
Q8WUI4	HDAC7	Histone deacetylase 7 OS=Homo sapiens OX=9606 GN=HDAC7 PE=1 SV=2 - [HDAC7_HUMAN]	Rare	0.0568182	0.07806
Q8IYA8	IHO1	Interactor of HORMAD1 protein 1 OS=Homo sapiens OX=9606 GN=IHO1 PE=1 SV=2 - [IHO1_HUMAN]	Rare	0.0568182	0.07761
Q8NCW6	GALNT11	Polypeptide N-acetylgalactosaminyltransferase 11 OS=Homo sapiens OX=9606 GN=GALNT11 PE=1 SV=2 - [GLT11_HUMAN]	Rare	0.0568182	0.07722
P42679	MATK	Megakaryocyte-associated tyrosine-protein kinase OS=Homo sapiens OX=9606 GN=MATK PE=1 SV=1 - [MATK_HUMAN]	Rare	0.0568182	0.0767
P59045	NLRP11	NACHT, LRR and PYD domains-containing protein 11 OS=Homo sapiens OX=9606 GN=NLRP11 PE=2 SV=2 - [NAL11_HUMAN]	Rare	0.0568182	0.07651
Q9NVM9	INTS13	Integrator complex subunit 13 OS=Homo sapiens OX=9606 GN=INTS13 PE=1 SV=2 - [INT13_HUMAN]	Rare	0.0568182	0.07651
O95741	CPNE6	Copine-6 OS=Homo sapiens OX=9606 GN=CPNE6 PE=1 SV=3 - [CPNE6_HUMAN]	Rare	0.0568182	0.0758
B2RTY4	MYO9A	Unconventional myosin-IXa OS=Homo sapiens OX=9606 GN=MYO9A PE=1 SV=2 - [MYO9A_HUMAN]	Rare	0.0568182	0.07567
Q658T7	FAM90A2P	Putative protein FAM90A2P OS=Homo sapiens OX=9606 GN=FAM90A2P PE=5 SV=2 - [F90A2_HUMAN]	Rare	0.0568182	0.07541
A6NH00	OR2T8	Olfactory receptor 2T8 OS=Homo sapiens OX=9606 GN=OR2T8 PE=3 SV=1 - [OR2T8_HUMAN]	Rare	0.0568182	0.07535
Q9BXT5	TEX15	Testis-expressed protein 15 OS=Homo sapiens OX=9606 GN=TEX15 PE=1 SV=2 - [TEX15_HUMAN]	Rare	0.0568182	0.07515
O94759	TRPM2	Transient receptor potential cation channel subfamily M member 2 OS=Homo sapiens OX=9606 GN=TRPM2 PE=1 SV=2 - [TRPM2_HUMAN]	Rare	0.0568182	0.07503
Q14993	COL19A1	Collagen alpha-1(XIX) chain OS=Homo sapiens OX=9606 GN=COL19A1 PE=1 SV=3 - [COJA1_HUMAN]	Rare	0.0568182	0.07425
Q14C86	GAPVD1	GTPase-activating protein and VPS9 domain-containing protein 1 OS=Homo sapiens OX=9606 GN=GAPVD1 PE=1 SV=2 - [GAPD1_HUMAN]	Rare	0.0568182	0.07386
P32004	L1CAM	Neural cell adhesion molecule L1 OS=Homo sapiens OX=9606 GN=L1CAM PE=1 SV=2 - [L1CAM_HUMAN]	Rare	0.0568182	0.07322
O00341	SLC1A7	Excitatory amino acid transporter 5 OS=Homo sapiens OX=9606 GN=SLC1A7 PE=2 SV=2 - [EAA5_HUMAN]	Rare	0.0568182	0.07315
O96006	ZBED1	E3 SUMO-protein ligase ZBED1 OS=Homo sapiens OX=9606 GN=ZBED1 PE=1 SV=1 - [ZBED1_HUMAN]	Rare	0.0568182	0.07302
O75602	SPAG6	Sperm-associated antigen 6 OS=Homo sapiens OX=9606 GN=SPAG6 PE=2 SV=1 - [SPAG6_HUMAN]	Rare	0.0568182	0.07296
Q6ZRS2	SRCAP	Helicase SRCAP OS=Homo sapiens OX=9606 GN=SRCAP PE=1 SV=3 - [SRCAP_HUMAN]	Rare	0.0568182	0.07277
Q02388	COL7A1	Collagen alpha-1(VII) chain OS=Homo sapiens OX=9606 GN=COL7A1 PE=1 SV=2 - [CO7A1_HUMAN]	Rare	0.0568182	0.0727
P21359	NF1	Neurofibromin OS=Homo sapiens OX=9606 GN=NF1 PE=1 SV=2 - [NF1_HUMAN]	Rare	0.0568182	0.07264
Q9H195	MUC3B	Mucin-3B (Fragments) OS=Homo sapiens OX=9606 GN=MUC3B PE=2 SV=2 - [MUC3B_HUMAN]	Rare	0.0568182	0.07206
Q86YZ3	HRNR	Hornerin OS=Homo sapiens OX=9606 GN=HRNR PE=1 SV=2 - [HORN_HUMAN]	Rare	0.0568182	0.07199
Q14997	PSME4	Proteasome activator complex subunit 4 OS=Homo sapiens OX=9606 GN=PSME4 PE=1 SV=2 - [PSME4_HUMAN]	Rare	0.0568182	0.07186
Q5T4D3	TMTC4	Protein O-mannosyl-transferase TMTC4 OS=Homo sapiens OX=9606 GN=TMTC4 PE=1 SV=2 - [TMTC4_HUMAN]	Rare	0.0568182	0.07167
Q6Y2X3	DNAJC14	DnaJ homolog subfamily C member 14 OS=Homo sapiens OX=9606 GN=DNAJC14 PE=2 SV=2 - [DJC14_HUMAN]	Rare	0.0568182	0.07122
Q14CZ0	C16orf72	UPF0472 protein C16orf72 OS=Homo sapiens OX=9606 GN=C16orf72 PE=1 SV=1 - [CP072_HUMAN]	Rare	0.0568182	0.07089
O00750	PIK3C2B	Phosphatidylinositol 4-phosphate 3-kinase C2 domain-containing subunit beta OS=Homo sapiens OX=9606 GN=PIK3C2B PE=1 SV=2 - [P3C2B_HUMAN]	Rare	0.0568182	0.07064
Q5HYC2	KIAA2026	Uncharacterized protein KIAA2026 OS=Homo sapiens OX=9606 GN=KIAA2026 PE=2 SV=2 - [K2026_HUMAN]	Rare	0.0568182	0.07064
Q86WK7	AMIGO3	Amphoterin-induced protein 3 OS=Homo sapiens OX=9606 GN=AMIGO3 PE=2 SV=1 - [AMGO3_HUMAN]	Rare	0.0568182	0.0698
Q9ULB4	CDH9	Cadherin-9 OS=Homo sapiens OX=9606 GN=CDH9 PE=2 SV=2 - [CADH9_HUMAN]	Rare	0.0568182	0.06967
Q5T124	UBXN11	UBX domain-containing protein 11 OS=Homo sapiens OX=9606 GN=UBXN11 PE=1 SV=2 - [UBX11_HUMAN]	Rare	0.0568182	0.06921
Q9UIF8	BAZ2B	Bromodomain adjacent to zinc finger domain protein 2B OS=Homo sapiens OX=9606 GN=BAZ2B PE=1 SV=3 - [BAZ2B_HUMAN]	Rare	0.0568182	0.06921
O75970	MPDZ	Multiple PDZ domain protein OS=Homo sapiens OX=9606 GN=MPDZ PE=1 SV=2 - [MPDZ_HUMAN]	Rare	0.0568182	0.06909
Q96L96	ALPK3	Alpha-protein kinase 3 OS=Homo sapiens OX=9606 GN=ALPK3 PE=1 SV=2 - [ALPK3_HUMAN]	Rare	0.0568182	0.06896
Q9UMS6	SYNPO2	Synaptopodin-2 OS=Homo sapiens OX=9606 GN=SYNPO2 PE=1 SV=2 - [SYNP2_HUMAN]	Rare	0.0568182	0.06896
Q7Z7G8	VPS13B	Vacuolar protein sorting-associated protein 13B OS=Homo sapiens OX=9606 GN=VPS13B PE=1 SV=2 - [VP13B_HUMAN]	Rare	0.0568182	0.06883
Q9NVR0	KLHL11	Kelch-like protein 11 OS=Homo sapiens OX=9606 GN=KLHL11 PE=1 SV=1 - [KLH11_HUMAN]	Rare	0.0568182	0.0687
O60287	URB1	Nucleolar pre-ribosomal-associated protein 1 OS=Homo sapiens OX=9606 GN=URB1 PE=1 SV=4 - [NPA1P_HUMAN]	Rare	0.0568182	0.06831
Q9HCE1	MOV10	Helicase MOV-10 OS=Homo sapiens OX=9606 GN=MOV10 PE=1 SV=2 - [MOV10_HUMAN]	Rare	0.0568182	0.06825
Q6PCD5	RFWD3	E3 ubiquitin-protein ligase RFWD3 OS=Homo sapiens OX=9606 GN=RFWD3 PE=1 SV=3 - [RFWD3_HUMAN]	Rare	0.0568182	0.06805
O95985	TOP3B	DNA topoisomerase 3-beta-1 OS=Homo sapiens OX=9606 GN=TOP3B PE=1 SV=1 - [TOP3B_HUMAN]	Rare	0.0568182	0.06779
O94812	BAIAP3	BAI1-associated protein 3 OS=Homo sapiens OX=9606 GN=BAIAP3 PE=1 SV=2 - [BAIP3_HUMAN]	Rare	0.0568182	0.06754
Q92615	LARP4B	La-related protein 4B OS=Homo sapiens OX=9606 GN=LARP4B PE=1 SV=3 - [LAR4B_HUMAN]	Rare	0.0568182	0.06754
Q15911	ZFHX3	Zinc finger homeobox protein 3 OS=Homo sapiens OX=9606 GN=ZFHX3 PE=1 SV=2 - [ZFHX3_HUMAN]	Rare	0.0568182	0.06747
Q86X10	RALGAPB	Ral GTPase-activating protein subunit beta OS=Homo sapiens OX=9606 GN=RALGAPB PE=1 SV=1 - [RLGPB_HUMAN]	Rare	0.0568182	0.06734
Q9UBN1	CACNG4	Voltage-dependent calcium channel gamma-4 subunit OS=Homo sapiens OX=9606 GN=CACNG4 PE=1 SV=1 - [CCG4_HUMAN]	Rare	0.0568182	0.06734
Q58EX2	SDK2	Protein sidekick-2 OS=Homo sapiens OX=9606 GN=SDK2 PE=1 SV=3 - [SDK2_HUMAN]	Rare	0.0568182	0.06708
Q9Y4D7	PLXND1	Plexin-D1 OS=Homo sapiens OX=9606 GN=PLXND1 PE=1 SV=3 - [PLXD1_HUMAN]	Rare	0.0568182	0.06696
P12694	BCKDHA	2-oxoisovalerate dehydrogenase subunit alpha, mitochondrial OS=Homo sapiens OX=9606 GN=BCKDHA PE=1 SV=2 - [ODBA_HUMAN]	Rare	0.0568182	0.06676
Q5T197	DCST1	E3 ubiquitin-protein ligase DCST1 OS=Homo sapiens OX=9606 GN=DCST1 PE=1 SV=1 - [DCST1_HUMAN]	Rare	0.0568182	0.06676
Q49AJ0	FAM135B	Protein FAM135B OS=Homo sapiens OX=9606 GN=FAM135B PE=2 SV=2 - [F135B_HUMAN]	Rare	0.0568182	0.0667
O96013	PAK4	Serine/threonine-protein kinase PAK 4 OS=Homo sapiens OX=9606 GN=PAK4 PE=1 SV=1 - [PAK4_HUMAN]	Rare	0.0568182	0.0665
Q96NH3	TBC1D32	Protein broad-minded OS=Homo sapiens OX=9606 GN=TBC1D32 PE=2 SV=4 - [BROMI_HUMAN]	Rare	0.0568182	0.06644
Q6W2J9	BCOR	BCL-6 corepressor OS=Homo sapiens OX=9606 GN=BCOR PE=1 SV=1 - [BCOR_HUMAN]	Rare	0.0568182	0.06612
A0A087X1C5	CYP2D7	Putative cytochrome P450 2D7 OS=Homo sapiens OX=9606 GN=CYP2D7 PE=5 SV=1 - [CP2D7_HUMAN]	Rare	0.0568182	0.06599
Q96SB3	PPP1R9B	Neurabin-2 OS=Homo sapiens OX=9606 GN=PPP1R9B PE=1 SV=3 - [NEB2_HUMAN]	Rare	0.0568182	0.06579
Q5H9R4	ARMCX4	Armadillo repeat-containing X-linked protein 4 OS=Homo sapiens OX=9606 GN=ARMCX4 PE=2 SV=3 - [ARMX4_HUMAN]	Rare	0.0568182	0.06566
Q9HD67	MYO10	Unconventional myosin-X OS=Homo sapiens OX=9606 GN=MYO10 PE=1 SV=3 - [MYO10_HUMAN]	Rare	0.0568182	0.06534
P10073	ZSCAN22	Zinc finger and SCAN domain-containing protein 22 OS=Homo sapiens OX=9606 GN=ZSCAN22 PE=1 SV=2 - [ZSC22_HUMAN]	Rare	0.0568182	0.06508
Q6ZS86	GK5	Putative glycerol kinase 5 OS=Homo sapiens OX=9606 GN=GK5 PE=2 SV=2 - [GLPK5_HUMAN]	Rare	0.0568182	0.06495
Q8IW93	ARHGEF19	Rho guanine nucleotide exchange factor 19 OS=Homo sapiens OX=9606 GN=ARHGEF19 PE=1 SV=1 - [ARHGJ_HUMAN]	Rare	0.0568182	0.06495
P17050	NAGA	Alpha-N-acetylgalactosaminidase OS=Homo sapiens OX=9606 GN=NAGA PE=1 SV=2 - [NAGAB_HUMAN]	Rare	0.0568182	0.06482
P40225	THPO	Thrombopoietin OS=Homo sapiens OX=9606 GN=THPO PE=1 SV=1 - [TPO_HUMAN]	Rare	0.0568182	0.0647
O15063	GARRE1	Granule associated Rac and RHOG effector protein 1 OS=Homo sapiens OX=9606 GN=GARRE1 PE=1 SV=2 - [GRRE1_HUMAN]	Rare	0.0568182	0.06437
Q8N635	MEIOB	Meiosis-specific with OB domain-containing protein OS=Homo sapiens OX=9606 GN=MEIOB PE=2 SV=3 - [MEIOB_HUMAN]	Rare	0.0568182	0.06418
Q14596	NBR1	Next to BRCA1 gene 1 protein OS=Homo sapiens OX=9606 GN=NBR1 PE=1 SV=3 - [NBR1_HUMAN]	Rare	0.0568182	0.06399
Q9Y6X6	MYO16	Unconventional myosin-XVI OS=Homo sapiens OX=9606 GN=MYO16 PE=1 SV=3 - [MYO16_HUMAN]	Rare	0.0568182	0.06386
Q29RF7	PDS5A	Sister chromatid cohesion protein PDS5 homolog A OS=Homo sapiens OX=9606 GN=PDS5A PE=1 SV=1 - [PDS5A_HUMAN]	Rare	0.0568182	0.06379
Q9H0H5	RACGAP1	Rac GTPase-activating protein 1 OS=Homo sapiens OX=9606 GN=RACGAP1 PE=1 SV=1 - [RGAP1_HUMAN]	Rare	0.0568182	0.06379
Q8TEQ6	GEMIN5	Gem-associated protein 5 OS=Homo sapiens OX=9606 GN=GEMIN5 PE=1 SV=3 - [GEMI5_HUMAN]	Rare	0.0568182	0.06373
Q8IZQ1	WDFY3	WD repeat and FYVE domain-containing protein 3 OS=Homo sapiens OX=9606 GN=WDFY3 PE=1 SV=2 - [WDFY3_HUMAN]	Rare	0.0568182	0.06366
Q9H2G2	SLK	STE20-like serine/threonine-protein kinase OS=Homo sapiens OX=9606 GN=SLK PE=1 SV=1 - [SLK_HUMAN]	Rare	0.0568182	0.06347
P25786	PSMA1	Proteasome subunit alpha type-1 OS=Homo sapiens OX=9606 GN=PSMA1 PE=1 SV=1 - [PSA1_HUMAN]	Rare	0.0568182	0.0634
Q9UBL6	CPNE7	Copine-7 OS=Homo sapiens OX=9606 GN=CPNE7 PE=1 SV=1 - [CPNE7_HUMAN]	Rare	0.0568182	0.0634
Q9H227	GBA3	Cytosolic beta-glucosidase OS=Homo sapiens OX=9606 GN=GBA3 PE=1 SV=2 - [GBA3_HUMAN]	Rare	0.0568182	0.06327
Q8NFY4	SEMA6D	Semaphorin-6D OS=Homo sapiens OX=9606 GN=SEMA6D PE=1 SV=1 - [SEM6D_HUMAN]	Rare	0.0568182	0.0625
Q9UJU5	FOXD3	Forkhead box protein D3 OS=Homo sapiens OX=9606 GN=FOXD3 PE=1 SV=1 - [FOXD3_HUMAN]	Rare	0.0568182	0.06244
O60296	TRAK2	Trafficking kinesin-binding protein 2 OS=Homo sapiens OX=9606 GN=TRAK2 PE=1 SV=2 - [TRAK2_HUMAN]	Rare	0.0568182	0.06231
Q96RD9	FCRL5	Fc receptor-like protein 5 OS=Homo sapiens OX=9606 GN=FCRL5 PE=1 SV=3 - [FCRL5_HUMAN]	Rare	0.0568182	0.06192
Q9UHV7	MED13	Mediator of RNA polymerase II transcription subunit 13 OS=Homo sapiens OX=9606 GN=MED13 PE=1 SV=3 - [MED13_HUMAN]	Rare	0.0568182	0.06185
O95294	RASAL1	RasGAP-activating-like protein 1 OS=Homo sapiens OX=9606 GN=RASAL1 PE=1 SV=3 - [RASL1_HUMAN]	Rare	0.0568182	0.06179
O43847	NRDC	Nardilysin OS=Homo sapiens OX=9606 GN=NRDC PE=1 SV=3 - [NRDC_HUMAN]	Rare	0.0568182	0.0614
Q5VW00	DCAF12L2	DDB1- and CUL4-associated factor 12-like protein 2 OS=Homo sapiens OX=9606 GN=DCAF12L2 PE=2 SV=1 - [DC122_HUMAN]	Rare	0.0568182	0.06134
Q9ULG1	INO80	Chromatin-remodeling ATPase INO80 OS=Homo sapiens OX=9606 GN=INO80 PE=1 SV=2 - [INO80_HUMAN]	Rare	0.0568182	0.06127
O60673	REV3L	DNA polymerase zeta catalytic subunit OS=Homo sapiens OX=9606 GN=REV3L PE=1 SV=2 - [REV3L_HUMAN]	Rare	0.0568182	0.06082
Q9HCK5	AGO4	Protein argonaute-4 OS=Homo sapiens OX=9606 GN=AGO4 PE=1 SV=2 - [AGO4_HUMAN]	Rare	0.0568182	0.06082
Q9Y2J2	EPB41L3	Band 4.1-like protein 3 OS=Homo sapiens OX=9606 GN=EPB41L3 PE=1 SV=2 - [E41L3_HUMAN]	Rare	0.0568182	0.06076
Q9P2V4	LRIT1	Leucine-rich repeat, immunoglobulin-like domain and transmembrane domain-containing protein 1 OS=Homo sapiens OX=9606 GN=LRIT1 PE=2 SV=1 - [LRIT1_HUMAN]	Rare	0.0568182	0.06056
Q13615	MTMR3	Myotubularin-related protein 3 OS=Homo sapiens OX=9606 GN=MTMR3 PE=1 SV=3 - [MTMR3_HUMAN]	Rare	0.0568182	0.06024
Q8WUM4	PDCD6IP	Programmed cell death 6-interacting protein OS=Homo sapiens OX=9606 GN=PDCD6IP PE=1 SV=1 - [PDC6I_HUMAN]	Rare	0.0568182	0.06024
O60494	CUBN	Cubilin OS=Homo sapiens OX=9606 GN=CUBN PE=1 SV=5 - [CUBN_HUMAN]	Rare	0.0568182	0.05998
Q13568	IRF5	Interferon regulatory factor 5 OS=Homo sapiens OX=9606 GN=IRF5 PE=1 SV=2 - [IRF5_HUMAN]	Rare	0.0568182	0.05998
P49815	TSC2	Tuberin OS=Homo sapiens OX=9606 GN=TSC2 PE=1 SV=2 - [TSC2_HUMAN]	Rare	0.0568182	0.05992
Q6PL18	ATAD2	ATPase family AAA domain-containing protein 2 OS=Homo sapiens OX=9606 GN=ATAD2 PE=1 SV=1 - [ATAD2_HUMAN]	Rare	0.0568182	0.05972
Q8TBJ5	FEZF2	Fez family zinc finger protein 2 OS=Homo sapiens OX=9606 GN=FEZF2 PE=2 SV=2 - [FEZF2_HUMAN]	Rare	0.0568182	0.05953
Q8NBS3	SLC4A11	Sodium bicarbonate transporter-like protein 11 OS=Homo sapiens OX=9606 GN=SLC4A11 PE=1 SV=2 - [S4A11_HUMAN]	Rare	0.0568182	0.05921
Q96AT9	RPE	Ribulose-phosphate 3-epimerase OS=Homo sapiens OX=9606 GN=RPE PE=1 SV=1 - [RPE_HUMAN]	Rare	0.0568182	0.05914
Q96J94	PIWIL1	Piwi-like protein 1 OS=Homo sapiens OX=9606 GN=PIWIL1 PE=1 SV=1 - [PIWL1_HUMAN]	Rare	0.0568182	0.05895
Q96J92	WNK4	Serine/threonine-protein kinase WNK4 OS=Homo sapiens OX=9606 GN=WNK4 PE=1 SV=1 - [WNK4_HUMAN]	Rare	0.0568182	0.05876
Q96T17	MAP7D2	MAP7 domain-containing protein 2 OS=Homo sapiens OX=9606 GN=MAP7D2 PE=1 SV=2 - [MA7D2_HUMAN]	Rare	0.0568182	0.05876
Q14999	CUL7	Cullin-7 OS=Homo sapiens OX=9606 GN=CUL7 PE=1 SV=2 - [CUL7_HUMAN]	Rare	0.0568182	0.0585
Q86WI3	NLRC5	Protein NLRC5 OS=Homo sapiens OX=9606 GN=NLRC5 PE=1 SV=3 - [NLRC5_HUMAN]	Rare	0.0568182	0.05798
Q5T5Y3	CAMSAP1	Calmodulin-regulated spectrin-associated protein 1 OS=Homo sapiens OX=9606 GN=CAMSAP1 PE=1 SV=2 - [CAMP1_HUMAN]	Rare	0.0568182	0.05779
Q9P2S2	NRXN2	Neurexin-2 OS=Homo sapiens OX=9606 GN=NRXN2 PE=2 SV=1 - [NRX2A_HUMAN]	Rare	0.0568182	0.05759
Q7Z333	SETX	Probable helicase senataxin OS=Homo sapiens OX=9606 GN=SETX PE=1 SV=4 - [SETX_HUMAN]	Rare	0.0568182	0.05714
Q8IVL1	NAV2	Neuron navigator 2 OS=Homo sapiens OX=9606 GN=NAV2 PE=1 SV=3 - [NAV2_HUMAN]	Rare	0.0568182	0.05701
Q8IWD5	MFSD6L	Major facilitator superfamily domain-containing protein 6-like OS=Homo sapiens OX=9606 GN=MFSD6L PE=2 SV=2 - [MFS6L_HUMAN]	Rare	0.0568182	0.05701
Q99698	LYST	Lysosomal-trafficking regulator OS=Homo sapiens OX=9606 GN=LYST PE=1 SV=3 - [LYST_HUMAN]	Rare	0.0568182	0.05701
Q5JUK3	KCNT1	Potassium channel subfamily T member 1 OS=Homo sapiens OX=9606 GN=KCNT1 PE=1 SV=2 - [KCNT1_HUMAN]	Rare	0.0568182	0.05682
Q13023	AKAP6	A-kinase anchor protein 6 OS=Homo sapiens OX=9606 GN=AKAP6 PE=1 SV=3 - [AKAP6_HUMAN]	Rare	0.0568182	0.05669
P45974	USP5	Ubiquitin carboxyl-terminal hydrolase 5 OS=Homo sapiens OX=9606 GN=USP5 PE=1 SV=2 - [UBP5_HUMAN]	Rare	0.0568182	0.05656
Q68E01	INTS3	Integrator complex subunit 3 OS=Homo sapiens OX=9606 GN=INTS3 PE=1 SV=1 - [INT3_HUMAN]	Rare	0.0568182	0.05637
P35913	PDE6B	Rod cGMP-specific 3',5'-cyclic phosphodiesterase subunit beta OS=Homo sapiens OX=9606 GN=PDE6B PE=1 SV=2 - [PDE6B_HUMAN]	Rare	0.0568182	0.0563
Q71F56	MED13L	Mediator of RNA polymerase II transcription subunit 13-like OS=Homo sapiens OX=9606 GN=MED13L PE=1 SV=1 - [MD13L_HUMAN]	Rare	0.0568182	0.0563
Q8NDM7	CFAP43	Cilia- and flagella-associated protein 43 OS=Homo sapiens OX=9606 GN=CFAP43 PE=1 SV=3 - [CFA43_HUMAN]	Rare	0.0568182	0.0563
P55290	CDH13	Cadherin-13 OS=Homo sapiens OX=9606 GN=CDH13 PE=1 SV=1 - [CAD13_HUMAN]	Rare	0.0568182	0.05604
P11388	TOP2A	DNA topoisomerase 2-alpha OS=Homo sapiens OX=9606 GN=TOP2A PE=1 SV=3 - [TOP2A_HUMAN]	Rare	0.0568182	0.05591
Q8TCG1	CIP2A	Protein CIP2A OS=Homo sapiens OX=9606 GN=CIP2A PE=1 SV=2 - [CIP2A_HUMAN]	Rare	0.0568182	0.05591
Q93008	USP9X	Probable ubiquitin carboxyl-terminal hydrolase FAF-X OS=Homo sapiens OX=9606 GN=USP9X PE=1 SV=4 - [USP9X_HUMAN]	Rare	0.0568182	0.05572
Q9Y2U5	MAP3K2	Mitogen-activated protein kinase kinase kinase 2 OS=Homo sapiens OX=9606 GN=MAP3K2 PE=1 SV=2 - [M3K2_HUMAN]	Rare	0.0568182	0.05566
Q14678	KANK1	KN motif and ankyrin repeat domain-containing protein 1 OS=Homo sapiens OX=9606 GN=KANK1 PE=1 SV=3 - [KANK1_HUMAN]	Rare	0.0568182	0.05559
P15144	ANPEP	Aminopeptidase N OS=Homo sapiens OX=9606 GN=ANPEP PE=1 SV=4 - [AMPN_HUMAN]	Rare	0.0568182	0.05553
Q9C000	NLRP1	NACHT, LRR and PYD domains-containing protein 1 OS=Homo sapiens OX=9606 GN=NLRP1 PE=1 SV=1 - [NLRP1_HUMAN]	Rare	0.0568182	0.05553
O60662	KLHL41	Kelch-like protein 41 OS=Homo sapiens OX=9606 GN=KLHL41 PE=1 SV=2 - [KLH41_HUMAN]	Rare	0.0568182	0.0554
O75122	CLASP2	CLIP-associating protein 2 OS=Homo sapiens OX=9606 GN=CLASP2 PE=1 SV=3 - [CLAP2_HUMAN]	Rare	0.0568182	0.05514
Q9UJM3	ERRFI1	ERBB receptor feedback inhibitor 1 OS=Homo sapiens OX=9606 GN=ERRFI1 PE=1 SV=1 - [ERRFI_HUMAN]	Rare	0.0568182	0.05514
Q8IYR0	CFAP206	Cilia- and flagella-associated protein 206 OS=Homo sapiens OX=9606 GN=CFAP206 PE=1 SV=2 - [CF206_HUMAN]	Rare	0.0568182	0.05501
Q8N201	INTS1	Integrator complex subunit 1 OS=Homo sapiens OX=9606 GN=INTS1 PE=1 SV=2 - [INT1_HUMAN]	Rare	0.0568182	0.05462
P01714	IGLV3-19	Immunoglobulin lambda variable 3-19 OS=Homo sapiens OX=9606 GN=IGLV3-19 PE=1 SV=2 - [LV319_HUMAN]	Rare	0.0568182	0.05443
Q9HB75	PIDD1	p53-induced death domain-containing protein 1 OS=Homo sapiens OX=9606 GN=PIDD1 PE=1 SV=2 - [PIDD1_HUMAN]	Rare	0.0568182	0.05424
Q7L7V1	DHX32	Putative pre-mRNA-splicing factor ATP-dependent RNA helicase DHX32 OS=Homo sapiens OX=9606 GN=DHX32 PE=1 SV=1 - [DHX32_HUMAN]	Rare	0.0568182	0.05411
P51826	AFF3	AF4/FMR2 family member 3 OS=Homo sapiens OX=9606 GN=AFF3 PE=1 SV=3 - [AFF3_HUMAN]	Rare	0.0568182	0.05391
Q4L235	AASDH	Beta-alanine-activating enzyme OS=Homo sapiens OX=9606 GN=AASDH PE=1 SV=3 - [ACSF4_HUMAN]	Rare	0.0568182	0.05391
Q9NS62	THSD1	Thrombospondin type-1 domain-containing protein 1 OS=Homo sapiens OX=9606 GN=THSD1 PE=1 SV=1 - [THSD1_HUMAN]	Rare	0.0568182	0.05385
Q9ULB1	NRXN1	Neurexin-1 OS=Homo sapiens OX=9606 GN=NRXN1 PE=1 SV=1 - [NRX1A_HUMAN]	Rare	0.0568182	0.05385
P42681	TXK	Tyrosine-protein kinase TXK OS=Homo sapiens OX=9606 GN=TXK PE=1 SV=3 - [TXK_HUMAN]	Rare	0.0568182	0.05372
Q8WVM7	STAG1	Cohesin subunit SA-1 OS=Homo sapiens OX=9606 GN=STAG1 PE=1 SV=3 - [STAG1_HUMAN]	Rare	0.0568182	0.05372
Q5U5X8	FAM222A	Protein FAM222A OS=Homo sapiens OX=9606 GN=FAM222A PE=2 SV=1 - [F222A_HUMAN]	Rare	0.0568182	0.05307
Q06418	TYRO3	Tyrosine-protein kinase receptor TYRO3 OS=Homo sapiens OX=9606 GN=TYRO3 PE=1 SV=1 - [TYRO3_HUMAN]	Rare	0.0568182	0.05294
Q6WCQ1	MPRIP	Myosin phosphatase Rho-interacting protein OS=Homo sapiens OX=9606 GN=MPRIP PE=1 SV=3 - [MPRIP_HUMAN]	Rare	0.0568182	0.05294
Q7Z309	FAM122B	Protein FAM122B OS=Homo sapiens OX=9606 GN=FAM122B PE=1 SV=2 - [F122B_HUMAN]	Rare	0.0568182	0.05288
Q8TED1	GPX8	Probable glutathione peroxidase 8 OS=Homo sapiens OX=9606 GN=GPX8 PE=1 SV=2 - [GPX8_HUMAN]	Rare	0.0568182	0.05275
Q66GS9	CEP135	Centrosomal protein of 135 kDa OS=Homo sapiens OX=9606 GN=CEP135 PE=1 SV=2 - [CP135_HUMAN]	Rare	0.0568182	0.05269
O15439	ABCC4	Multidrug resistance-associated protein 4 OS=Homo sapiens OX=9606 GN=ABCC4 PE=1 SV=3 - [MRP4_HUMAN]	Rare	0.0568182	0.05262
Q7Z4Y8	ATP5MGL	Putative ATP synthase subunit g 2, mitochondrial OS=Homo sapiens OX=9606 GN=ATP5MGL PE=5 SV=1 - [AT5L2_HUMAN]	Rare	0.0568182	0.05249
O60333	KIF1B	Kinesin-like protein KIF1B OS=Homo sapiens OX=9606 GN=KIF1B PE=1 SV=5 - [KIF1B_HUMAN]	Rare	0.0568182	0.0523
P15538	CYP11B1	Cytochrome P450 11B1, mitochondrial OS=Homo sapiens OX=9606 GN=CYP11B1 PE=1 SV=5 - [C11B1_HUMAN]	Rare	0.0568182	0.0523
Q93074	MED12	Mediator of RNA polymerase II transcription subunit 12 OS=Homo sapiens OX=9606 GN=MED12 PE=1 SV=4 - [MED12_HUMAN]	Rare	0.0568182	0.05223
Q6P5Z2	PKN3	Serine/threonine-protein kinase N3 OS=Homo sapiens OX=9606 GN=PKN3 PE=1 SV=1 - [PKN3_HUMAN]	Rare	0.0568182	0.05217
Q9BQ89	FAM110A	Protein FAM110A OS=Homo sapiens OX=9606 GN=FAM110A PE=1 SV=1 - [F110A_HUMAN]	Rare	0.0568182	0.05217
Q9Y2H6	FNDC3A	Fibronectin type-III domain-containing protein 3A OS=Homo sapiens OX=9606 GN=FNDC3A PE=1 SV=4 - [FND3A_HUMAN]	Rare	0.0568182	0.05165
O60231	DHX16	Pre-mRNA-splicing factor ATP-dependent RNA helicase DHX16 OS=Homo sapiens OX=9606 GN=DHX16 PE=1 SV=2 - [DHX16_HUMAN]	Rare	0.0568182	0.05146
P08910	ABHD2	Monoacylglycerol lipase ABHD2 OS=Homo sapiens OX=9606 GN=ABHD2 PE=1 SV=1 - [ABHD2_HUMAN]	Rare	0.0568182	0.05139
P43657	LPAR6	Lysophosphatidic acid receptor 6 OS=Homo sapiens OX=9606 GN=LPAR6 PE=1 SV=3 - [LPAR6_HUMAN]	Rare	0.0568182	0.05127
Q92621	NUP205	Nuclear pore complex protein Nup205 OS=Homo sapiens OX=9606 GN=NUP205 PE=1 SV=3 - [NU205_HUMAN]	Rare	0.0568182	0.05127
P42695	NCAPD3	Condensin-2 complex subunit D3 OS=Homo sapiens OX=9606 GN=NCAPD3 PE=1 SV=2 - [CNDD3_HUMAN]	Rare	0.0568182	0.05114
Q8IZW8	TNS4	Tensin-4 OS=Homo sapiens OX=9606 GN=TNS4 PE=1 SV=3 - [TENS4_HUMAN]	Rare	0.0568182	0.05075
Q8WWL7	CCNB3	G2/mitotic-specific cyclin-B3 OS=Homo sapiens OX=9606 GN=CCNB3 PE=1 SV=2 - [CCNB3_HUMAN]	Rare	0.0568182	0.05062
Q96HP0	DOCK6	Dedicator of cytokinesis protein 6 OS=Homo sapiens OX=9606 GN=DOCK6 PE=1 SV=3 - [DOCK6_HUMAN]	Rare	0.0568182	0.05043
O15049	N4BP3	NEDD4-binding protein 3 OS=Homo sapiens OX=9606 GN=N4BP3 PE=1 SV=3 - [N4BP3_HUMAN]	Rare	0.0568182	0.05036
O95359	TACC2	Transforming acidic coiled-coil-containing protein 2 OS=Homo sapiens OX=9606 GN=TACC2 PE=1 SV=3 - [TACC2_HUMAN]	Rare	0.0568182	0.05023
P56179	DLX6	Homeobox protein DLX-6 OS=Homo sapiens OX=9606 GN=DLX6 PE=2 SV=2 - [DLX6_HUMAN]	Rare	0.0568182	0.0501
Q8WYP5	AHCTF1	Protein ELYS OS=Homo sapiens OX=9606 GN=AHCTF1 PE=1 SV=3 - [ELYS_HUMAN]	Rare	0.0568182	0.04978
Q70YC5	ZNF365	Protein ZNF365 OS=Homo sapiens OX=9606 GN=ZNF365 PE=1 SV=3 - [ZN365_HUMAN]	Rare	0.0568182	0.04972
P20594	NPR2	Atrial natriuretic peptide receptor 2 OS=Homo sapiens OX=9606 GN=NPR2 PE=1 SV=1 - [ANPRB_HUMAN]	Rare	0.0568182	0.04933
Q5XPI4	RNF123	E3 ubiquitin-protein ligase RNF123 OS=Homo sapiens OX=9606 GN=RNF123 PE=1 SV=1 - [RN123_HUMAN]	Rare	0.0568182	0.04894
O14791	APOL1	Apolipoprotein L1 OS=Homo sapiens OX=9606 GN=APOL1 PE=1 SV=5 - [APOL1_HUMAN]	Rare	0.0568182	0.04881
O14513	NCKAP5	Nck-associated protein 5 OS=Homo sapiens OX=9606 GN=NCKAP5 PE=1 SV=2 - [NCKP5_HUMAN]	Rare	0.0568182	0.04875
Q12829	RAB40B	Ras-related protein Rab-40B OS=Homo sapiens OX=9606 GN=RAB40B PE=1 SV=1 - [RB40B_HUMAN]	Rare	0.0568182	0.04862
Q9H1I8	ASCC2	Activating signal cointegrator 1 complex subunit 2 OS=Homo sapiens OX=9606 GN=ASCC2 PE=1 SV=3 - [ASCC2_HUMAN]	Rare	0.0568182	0.04784
Q12767	TMEM94	Transmembrane protein 94 OS=Homo sapiens OX=9606 GN=TMEM94 PE=1 SV=1 - [TMM94_HUMAN]	Rare	0.0568182	0.04765
P21709	EPHA1	Ephrin type-A receptor 1 OS=Homo sapiens OX=9606 GN=EPHA1 PE=1 SV=4 - [EPHA1_HUMAN]	Rare	0.0568182	0.04759
Q9Y3R5	DOP1B	Protein dopey-2 OS=Homo sapiens OX=9606 GN=DOP1B PE=1 SV=5 - [DOP2_HUMAN]	Rare	0.0568182	0.04752
O60840	CACNA1F	Voltage-dependent L-type calcium channel subunit alpha-1F OS=Homo sapiens OX=9606 GN=CACNA1F PE=1 SV=2 - [CAC1F_HUMAN]	Rare	0.0568182	0.04739
Q8WUJ3	CEMIP	Cell migration-inducing and hyaluronan-binding protein OS=Homo sapiens OX=9606 GN=CEMIP PE=1 SV=2 - [CEMIP_HUMAN]	Rare	0.0568182	0.04739
Q9NXG0	CNTLN	Centlein OS=Homo sapiens OX=9606 GN=CNTLN PE=1 SV=6 - [CNTLN_HUMAN]	Rare	0.0568182	0.04739
O15164	TRIM24	Transcription intermediary factor 1-alpha OS=Homo sapiens OX=9606 GN=TRIM24 PE=1 SV=3 - [TIF1A_HUMAN]	Rare	0.0568182	0.04713
P40123	CAP2	Adenylyl cyclase-associated protein 2 OS=Homo sapiens OX=9606 GN=CAP2 PE=1 SV=1 - [CAP2_HUMAN]	Rare	0.0568182	0.04713
Q9H251	CDH23	Cadherin-23 OS=Homo sapiens OX=9606 GN=CDH23 PE=1 SV=2 - [CAD23_HUMAN]	Rare	0.0568182	0.04713
P0CK96	SLC35E2B	Solute carrier family 35 member E2B OS=Homo sapiens OX=9606 GN=SLC35E2B PE=2 SV=1 - [S352B_HUMAN]	Rare	0.0568182	0.047
Q14831	GRM7	Metabotropic glutamate receptor 7 OS=Homo sapiens OX=9606 GN=GRM7 PE=1 SV=1 - [GRM7_HUMAN]	Rare	0.0568182	0.04688
A6NLP5	TTC36	Tetratricopeptide repeat protein 36 OS=Homo sapiens OX=9606 GN=TTC36 PE=1 SV=1 - [TTC36_HUMAN]	Rare	0.0568182	0.04675
P00740	F9	Coagulation factor IX OS=Homo sapiens OX=9606 GN=F9 PE=1 SV=2 - [FA9_HUMAN]	Rare	0.0568182	0.04662
Q8IWB9	TEX2	Testis-expressed protein 2 OS=Homo sapiens OX=9606 GN=TEX2 PE=1 SV=2 - [TEX2_HUMAN]	Rare	0.0568182	0.04662
Q8NFQ6	BPIFC	BPI fold-containing family C protein OS=Homo sapiens OX=9606 GN=BPIFC PE=2 SV=1 - [BPIFC_HUMAN]	Rare	0.0568182	0.04662
Q9NXZ1	SAGE1	Sarcoma antigen 1 OS=Homo sapiens OX=9606 GN=SAGE1 PE=1 SV=2 - [SAGE1_HUMAN]	Rare	0.0568182	0.04636
O75787	ATP6AP2	Renin receptor OS=Homo sapiens OX=9606 GN=ATP6AP2 PE=1 SV=2 - [RENR_HUMAN]	Rare	0.0568182	0.04616
Q86SU0	ILDR1	Immunoglobulin-like domain-containing receptor 1 OS=Homo sapiens OX=9606 GN=ILDR1 PE=1 SV=2 - [ILDR1_HUMAN]	Rare	0.0568182	0.04616
O15078	CEP290	Centrosomal protein of 290 kDa OS=Homo sapiens OX=9606 GN=CEP290 PE=1 SV=2 - [CE290_HUMAN]	Rare	0.0568182	0.0461
Q9BVV6	KIAA0586	Protein TALPID3 OS=Homo sapiens OX=9606 GN=KIAA0586 PE=1 SV=4 - [TALD3_HUMAN]	Rare	0.0568182	0.0461
Q96LC7	SIGLEC10	Sialic acid-binding Ig-like lectin 10 OS=Homo sapiens OX=9606 GN=SIGLEC10 PE=1 SV=3 - [SIG10_HUMAN]	Rare	0.0568182	0.04597
Q15818	NPTX1	Neuronal pentraxin-1 OS=Homo sapiens OX=9606 GN=NPTX1 PE=1 SV=2 - [NPTX1_HUMAN]	Rare	0.0568182	0.04591
Q08174	PCDH1	Protocadherin-1 OS=Homo sapiens OX=9606 GN=PCDH1 PE=1 SV=2 - [PCDH1_HUMAN]	Rare	0.0568182	0.04545
Q8WXS8	ADAMTS14	A disintegrin and metalloproteinase with thrombospondin motifs 14 OS=Homo sapiens OX=9606 GN=ADAMTS14 PE=2 SV=2 - [ATS14_HUMAN]	Rare	0.0568182	0.04533
Q5T890	ERCC6L2	DNA excision repair protein ERCC-6-like 2 OS=Homo sapiens OX=9606 GN=ERCC6L2 PE=1 SV=2 - [ER6L2_HUMAN]	Rare	0.0568182	0.04507
Q96NN9	AIFM3	Apoptosis-inducing factor 3 OS=Homo sapiens OX=9606 GN=AIFM3 PE=1 SV=1 - [AIFM3_HUMAN]	Rare	0.0568182	0.04455
P54756	EPHA5	Ephrin type-A receptor 5 OS=Homo sapiens OX=9606 GN=EPHA5 PE=1 SV=3 - [EPHA5_HUMAN]	Rare	0.0568182	0.04442
Q13033	STRN3	Striatin-3 OS=Homo sapiens OX=9606 GN=STRN3 PE=1 SV=3 - [STRN3_HUMAN]	Rare	0.0568182	0.04429
Q13136	PPFIA1	Liprin-alpha-1 OS=Homo sapiens OX=9606 GN=PPFIA1 PE=1 SV=1 - [LIPA1_HUMAN]	Rare	0.0568182	0.04423
P31629	HIVEP2	Transcription factor HIVEP2 OS=Homo sapiens OX=9606 GN=HIVEP2 PE=1 SV=2 - [ZEP2_HUMAN]	Rare	0.0568182	0.04384
P57073	SOX8	Transcription factor SOX-8 OS=Homo sapiens OX=9606 GN=SOX8 PE=2 SV=1 - [SOX8_HUMAN]	Rare	0.0568182	0.04378
Q14690	PDCD11	Protein RRP5 homolog OS=Homo sapiens OX=9606 GN=PDCD11 PE=1 SV=3 - [RRP5_HUMAN]	Rare	0.0568182	0.04378
Q14156	EFR3A	Protein EFR3 homolog A OS=Homo sapiens OX=9606 GN=EFR3A PE=1 SV=2 - [EFR3A_HUMAN]	Rare	0.0568182	0.04365
Q8TDI7	TMC2	Transmembrane channel-like protein 2 OS=Homo sapiens OX=9606 GN=TMC2 PE=2 SV=3 - [TMC2_HUMAN]	Rare	0.0568182	0.04352
Q99719	SEPTIN5	Septin-5 OS=Homo sapiens OX=9606 GN=SEPTIN5 PE=1 SV=1 - [SEPT5_HUMAN]	Rare	0.0568182	0.04352
O43687	AKAP7	A-kinase anchor protein 7 isoforms alpha and beta OS=Homo sapiens OX=9606 GN=AKAP7 PE=1 SV=4 - [AKA7A_HUMAN]	Rare	0.0568182	0.04287
Q9C0A6	SETD5	Histone-lysine N-methyltransferase SETD5 OS=Homo sapiens OX=9606 GN=SETD5 PE=1 SV=2 - [SETD5_HUMAN]	Rare	0.0568182	0.04287
O14512	SOCS7	Suppressor of cytokine signaling 7 OS=Homo sapiens OX=9606 GN=SOCS7 PE=1 SV=2 - [SOCS7_HUMAN]	Rare	0.0568182	0.04281
Q9Y6Y1	CAMTA1	Calmodulin-binding transcription activator 1 OS=Homo sapiens OX=9606 GN=CAMTA1 PE=1 SV=4 - [CMTA1_HUMAN]	Rare	0.0568182	0.04281
Q6ZMV9	KIF6	Kinesin-like protein KIF6 OS=Homo sapiens OX=9606 GN=KIF6 PE=1 SV=3 - [KIF6_HUMAN]	Rare	0.0568182	0.04274
Q13905	RAPGEF1	Rap guanine nucleotide exchange factor 1 OS=Homo sapiens OX=9606 GN=RAPGEF1 PE=1 SV=3 - [RPGF1_HUMAN]	Rare	0.0568182	0.04248
O14617	AP3D1	AP-3 complex subunit delta-1 OS=Homo sapiens OX=9606 GN=AP3D1 PE=1 SV=1 - [AP3D1_HUMAN]	Rare	0.0568182	0.04197
O14896	IRF6	Interferon regulatory factor 6 OS=Homo sapiens OX=9606 GN=IRF6 PE=1 SV=1 - [IRF6_HUMAN]	Rare	0.0568182	0.04184
Q6NXP0	EFCAB12	EF-hand calcium-binding domain-containing protein 12 OS=Homo sapiens OX=9606 GN=EFCAB12 PE=1 SV=1 - [EFC12_HUMAN]	Rare	0.0568182	0.04165
P14151	SELL	L-selectin OS=Homo sapiens OX=9606 GN=SELL PE=1 SV=2 - [LYAM1_HUMAN]	Rare	0.0568182	0.04152
Q6IQ55	TTBK2	Tau-tubulin kinase 2 OS=Homo sapiens OX=9606 GN=TTBK2 PE=1 SV=2 - [TTBK2_HUMAN]	Rare	0.0568182	0.04119
Q8NEB7	ACRBP	Acrosin-binding protein OS=Homo sapiens OX=9606 GN=ACRBP PE=2 SV=1 - [ACRBP_HUMAN]	Rare	0.0568182	0.04119
Q14766	LTBP1	Latent-transforming growth factor beta-binding protein 1 OS=Homo sapiens OX=9606 GN=LTBP1 PE=1 SV=4 - [LTBP1_HUMAN]	Rare	0.0568182	0.04055
Q9P2H0	CEP126	Centrosomal protein of 126 kDa OS=Homo sapiens OX=9606 GN=CEP126 PE=1 SV=3 - [CE126_HUMAN]	Rare	0.0568182	0.04055
O75128	COBL	Protein cordon-bleu OS=Homo sapiens OX=9606 GN=COBL PE=1 SV=2 - [COBL_HUMAN]	Rare	0.0568182	0.03977
Q6ZV29	PNPLA7	Patatin-like phospholipase domain-containing protein 7 OS=Homo sapiens OX=9606 GN=PNPLA7 PE=1 SV=4 - [PLPL7_HUMAN]	Rare	0.0568182	0.03945
Q8N6T3	ARFGAP1	ADP-ribosylation factor GTPase-activating protein 1 OS=Homo sapiens OX=9606 GN=ARFGAP1 PE=1 SV=2 - [ARFG1_HUMAN]	Rare	0.0568182	0.03913
Q8N2M8	CLASRP	CLK4-associating serine/arginine rich protein OS=Homo sapiens OX=9606 GN=CLASRP PE=1 SV=4 - [CLASR_HUMAN]	Rare	0.0568182	0.039
Q8WWI1	LMO7	LIM domain only protein 7 OS=Homo sapiens OX=9606 GN=LMO7 PE=1 SV=3 - [LMO7_HUMAN]	Rare	0.0568182	0.039
Q9UBY0	SLC9A2	Sodium/hydrogen exchanger 2 OS=Homo sapiens OX=9606 GN=SLC9A2 PE=2 SV=1 - [SL9A2_HUMAN]	Rare	0.0568182	0.03874
P0C221	CCDC175	Coiled-coil domain-containing protein 175 OS=Homo sapiens OX=9606 GN=CCDC175 PE=4 SV=2 - [CC175_HUMAN]	Rare	0.0568182	0.03848
Q5M9N0	CCDC158	Coiled-coil domain-containing protein 158 OS=Homo sapiens OX=9606 GN=CCDC158 PE=2 SV=2 - [CD158_HUMAN]	Rare	0.0568182	0.03835
Q9NRN7	AASDHPPT	L-aminoadipate-semialdehyde dehydrogenase-phosphopantetheinyl transferase OS=Homo sapiens OX=9606 GN=AASDHPPT PE=1 SV=2 - [ADPPT_HUMAN]	Rare	0.0568182	0.03822
Q5HYW2	NHSL2	NHS-like protein 2 OS=Homo sapiens OX=9606 GN=NHSL2 PE=1 SV=2 - [NHSL2_HUMAN]	Rare	0.0568182	0.03816
Q5T011	SZT2	KICSTOR complex protein SZT2 OS=Homo sapiens OX=9606 GN=SZT2 PE=1 SV=3 - [SZT2_HUMAN]	Rare	0.0568182	0.03796
Q70EL3	USP50	Inactive ubiquitin carboxyl-terminal hydrolase 50 OS=Homo sapiens OX=9606 GN=USP50 PE=2 SV=1 - [UBP50_HUMAN]	Rare	0.0568182	0.03796
Q9H330	TMEM245	Transmembrane protein 245 OS=Homo sapiens OX=9606 GN=TMEM245 PE=1 SV=3 - [TM245_HUMAN]	Rare	0.0568182	0.03713
P54296	MYOM2	Myomesin-2 OS=Homo sapiens OX=9606 GN=MYOM2 PE=1 SV=2 - [MYOM2_HUMAN]	Rare	0.0568182	0.03538
Q9BXI9	C1QTNF6	Complement C1q tumor necrosis factor-related protein 6 OS=Homo sapiens OX=9606 GN=C1QTNF6 PE=1 SV=4 - [C1QT6_HUMAN]	Rare	0.0568182	0.03519
Q9HAT2	SIAE	Sialate O-acetylesterase OS=Homo sapiens OX=9606 GN=SIAE PE=1 SV=1 - [SIAE_HUMAN]	Rare	0.0568182	0.03487
Q15008	PSMD6	26S proteasome non-ATPase regulatory subunit 6 OS=Homo sapiens OX=9606 GN=PSMD6 PE=1 SV=1 - [PSMD6_HUMAN]	Rare	0.0568182	0.0348
Q07343	PDE4B	cAMP-specific 3',5'-cyclic phosphodiesterase 4B OS=Homo sapiens OX=9606 GN=PDE4B PE=1 SV=1 - [PDE4B_HUMAN]	Rare	0.0568182	0.0337
Q9H4M7	PLEKHA4	Pleckstrin homology domain-containing family A member 4 OS=Homo sapiens OX=9606 GN=PLEKHA4 PE=1 SV=2 - [PKHA4_HUMAN]	Rare	0.0568182	0.03345
Q63HQ2	EGFLAM	Pikachurin OS=Homo sapiens OX=9606 GN=EGFLAM PE=1 SV=2 - [EGFLA_HUMAN]	Rare	0.0568182	0.03338
Q8TE58	ADAMTS15	A disintegrin and metalloproteinase with thrombospondin motifs 15 OS=Homo sapiens OX=9606 GN=ADAMTS15 PE=2 SV=1 - [ATS15_HUMAN]	Rare	0.0568182	0.03332
Q9NQW6	ANLN	Anillin OS=Homo sapiens OX=9606 GN=ANLN PE=1 SV=2 - [ANLN_HUMAN]	Rare	0.0568182	0.03306
O95672	ECEL1	Endothelin-converting enzyme-like 1 OS=Homo sapiens OX=9606 GN=ECEL1 PE=1 SV=3 - [ECEL1_HUMAN]	Rare	0.0568182	0.03228
Q99497	PARK7	Parkinson disease protein 7 OS=Homo sapiens OX=9606 GN=PARK7 PE=1 SV=2 - [PARK7_HUMAN]	Rare	0.0568182	0.03183
Q9Y490	TLN1	Talin-1 OS=Homo sapiens OX=9606 GN=TLN1 PE=1 SV=3 - [TLN1_HUMAN]	Rare	0.0568182	0.03048
Q9Y2E4	DIP2C	Disco-interacting protein 2 homolog C OS=Homo sapiens OX=9606 GN=DIP2C PE=1 SV=2 - [DIP2C_HUMAN]	Rare	0.0568182	0.03022
Q8IZK6	MCOLN2	Mucolipin-2 OS=Homo sapiens OX=9606 GN=MCOLN2 PE=1 SV=2 - [MCLN2_HUMAN]	Rare	0.0568182	0.02983
O60318	MCM3AP	Germinal-center associated nuclear protein OS=Homo sapiens OX=9606 GN=MCM3AP PE=1 SV=2 - [GANP_HUMAN]	Rare	0.0568182	0.02725
P48668	KRT6C	Keratin, type II cytoskeletal 6C OS=Homo sapiens OX=9606 GN=KRT6C PE=1 SV=3 - [K2C6C_HUMAN]	Rare	0.0454545	1.40438
P29508	SERPINB3	Serpin B3 OS=Homo sapiens OX=9606 GN=SERPINB3 PE=1 SV=2 - [SPB3_HUMAN]	Rare	0.0454545	0.61493
P08729	KRT7	Keratin, type II cytoskeletal 7 OS=Homo sapiens OX=9606 GN=KRT7 PE=1 SV=5 - [K2C7_HUMAN]	Rare	0.0454545	0.47624
P13646	KRT13	Keratin, type I cytoskeletal 13 OS=Homo sapiens OX=9606 GN=KRT13 PE=1 SV=4 - [K1C13_HUMAN]	Rare	0.0454545	0.47249
Q01546	KRT76	Keratin, type II cytoskeletal 2 oral OS=Homo sapiens OX=9606 GN=KRT76 PE=1 SV=2 - [K22O_HUMAN]	Rare	0.0454545	0.45003
P68366	TUBA4A	Tubulin alpha-4A chain OS=Homo sapiens OX=9606 GN=TUBA4A PE=1 SV=1 - [TBA4A_HUMAN]	Rare	0.0454545	0.4406
P31944	CASP14	Caspase-14 OS=Homo sapiens OX=9606 GN=CASP14 PE=1 SV=2 - [CASPE_HUMAN]	Rare	0.0454545	0.24483
Q86Y46	KRT73	Keratin, type II cytoskeletal 73 OS=Homo sapiens OX=9606 GN=KRT73 PE=1 SV=1 - [K2C73_HUMAN]	Rare	0.0454545	0.23037
Q8WVV4	POF1B	Protein POF1B OS=Homo sapiens OX=9606 GN=POF1B PE=1 SV=3 - [POF1B_HUMAN]	Rare	0.0454545	0.22224
P53673	CRYBA4	Beta-crystallin A4 OS=Homo sapiens OX=9606 GN=CRYBA4 PE=1 SV=3 - [CRBA4_HUMAN]	Rare	0.0454545	0.18634
P04040	CAT	Catalase OS=Homo sapiens OX=9606 GN=CAT PE=1 SV=3 - [CATA_HUMAN]	Rare	0.0454545	0.17381
P53396	ACLY	ATP-citrate synthase OS=Homo sapiens OX=9606 GN=ACLY PE=1 SV=3 - [ACLY_HUMAN]	Rare	0.0454545	0.16858
Q13835	PKP1	Plakophilin-1 OS=Homo sapiens OX=9606 GN=PKP1 PE=1 SV=2 - [PKP1_HUMAN]	Rare	0.0454545	0.166
O43707	ACTN4	Alpha-actinin-4 OS=Homo sapiens OX=9606 GN=ACTN4 PE=1 SV=2 - [ACTN4_HUMAN]	Rare	0.0454545	0.16103
P05109	S100A8	Protein S100-A8 OS=Homo sapiens OX=9606 GN=S100A8 PE=1 SV=1 - [S10A8_HUMAN]	Rare	0.0454545	0.15393
P25705	ATP5F1A	ATP synthase subunit alpha, mitochondrial OS=Homo sapiens OX=9606 GN=ATP5F1A PE=1 SV=1 - [ATPA_HUMAN]	Rare	0.0454545	0.14585
Q9ULV1	FZD4	Frizzled-4 OS=Homo sapiens OX=9606 GN=FZD4 PE=1 SV=2 - [FZD4_HUMAN]	Rare	0.0454545	0.14347
Q5FWF5	ESCO1	N-acetyltransferase ESCO1 OS=Homo sapiens OX=9606 GN=ESCO1 PE=1 SV=3 - [ESCO1_HUMAN]	Rare	0.0454545	0.1425
Q86SJ6	DSG4	Desmoglein-4 OS=Homo sapiens OX=9606 GN=DSG4 PE=1 SV=1 - [DSG4_HUMAN]	Rare	0.0454545	0.1363
P12814	ACTN1	Alpha-actinin-1 OS=Homo sapiens OX=9606 GN=ACTN1 PE=1 SV=2 - [ACTN1_HUMAN]	Rare	0.0454545	0.13501
Q14410	GK2	Glycerol kinase 2 OS=Homo sapiens OX=9606 GN=GK2 PE=2 SV=2 - [GLPK2_HUMAN]	Rare	0.0454545	0.12739
O75899	GABBR2	Gamma-aminobutyric acid type B receptor subunit 2 OS=Homo sapiens OX=9606 GN=GABBR2 PE=1 SV=1 - [GABR2_HUMAN]	Rare	0.0454545	0.12629
C9J7I0	UMAD1	UBAP1-MVB12-associated (UMA)-domain containing protein 1 OS=Homo sapiens OX=9606 GN=UMAD1 PE=1 SV=2 - [UMAD1_HUMAN]	Rare	0.0454545	0.12494
O43252	PAPSS1	Bifunctional 3'-phosphoadenosine 5'-phosphosulfate synthase 1 OS=Homo sapiens OX=9606 GN=PAPSS1 PE=1 SV=2 - [PAPS1_HUMAN]	Rare	0.0454545	0.12487
Q13042	CDC16	Cell division cycle protein 16 homolog OS=Homo sapiens OX=9606 GN=CDC16 PE=1 SV=2 - [CDC16_HUMAN]	Rare	0.0454545	0.11964
P23508	MCC	Colorectal mutant cancer protein OS=Homo sapiens OX=9606 GN=MCC PE=1 SV=2 - [CRCM_HUMAN]	Rare	0.0454545	0.11712
O60284	ST18	Suppression of tumorigenicity 18 protein OS=Homo sapiens OX=9606 GN=ST18 PE=1 SV=1 - [ST18_HUMAN]	Rare	0.0454545	0.11654
P35241	RDX	Radixin OS=Homo sapiens OX=9606 GN=RDX PE=1 SV=1 - [RADI_HUMAN]	Rare	0.0454545	0.11603
P53621	COPA	Coatomer subunit alpha OS=Homo sapiens OX=9606 GN=COPA PE=1 SV=2 - [COPA_HUMAN]	Rare	0.0454545	0.11467
Q9BZZ2	SIGLEC1	Sialoadhesin OS=Homo sapiens OX=9606 GN=SIGLEC1 PE=1 SV=2 - [SN_HUMAN]	Rare	0.0454545	0.11441
P26038	MSN	Moesin OS=Homo sapiens OX=9606 GN=MSN PE=1 SV=3 - [MOES_HUMAN]	Rare	0.0454545	0.11021
Q2LD37	KIAA1109	Transmembrane protein KIAA1109 OS=Homo sapiens OX=9606 GN=KIAA1109 PE=1 SV=2 - [K1109_HUMAN]	Rare	0.0454545	0.10976
Q8N0W3	FCSK	L-fucose kinase OS=Homo sapiens OX=9606 GN=FCSK PE=1 SV=2 - [FCSK_HUMAN]	Rare	0.0454545	0.10679
Q96C03	MIEF2	Mitochondrial dynamics protein MID49 OS=Homo sapiens OX=9606 GN=MIEF2 PE=1 SV=1 - [MID49_HUMAN]	Rare	0.0454545	0.1064
Q8NEY1	NAV1	Neuron navigator 1 OS=Homo sapiens OX=9606 GN=NAV1 PE=1 SV=2 - [NAV1_HUMAN]	Rare	0.0454545	0.10473
Q96HA9	PEX11G	Peroxisomal membrane protein 11C OS=Homo sapiens OX=9606 GN=PEX11G PE=1 SV=1 - [PX11C_HUMAN]	Rare	0.0454545	0.10221
Q9BX10	GTPBP2	GTP-binding protein 2 OS=Homo sapiens OX=9606 GN=GTPBP2 PE=1 SV=1 - [GTPB2_HUMAN]	Rare	0.0454545	0.1013
P12273	PIP	Prolactin-inducible protein OS=Homo sapiens OX=9606 GN=PIP PE=1 SV=1 - [PIP_HUMAN]	Rare	0.0454545	0.10059
Q8N9C0	IGSF22	Immunoglobulin superfamily member 22 OS=Homo sapiens OX=9606 GN=IGSF22 PE=2 SV=2 - [IGS22_HUMAN]	Rare	0.0454545	0.09982
Q5TCY1	TTBK1	Tau-tubulin kinase 1 OS=Homo sapiens OX=9606 GN=TTBK1 PE=1 SV=2 - [TTBK1_HUMAN]	Rare	0.0454545	0.09833
Q15858	SCN9A	Sodium channel protein type 9 subunit alpha OS=Homo sapiens OX=9606 GN=SCN9A PE=1 SV=3 - [SCN9A_HUMAN]	Rare	0.0454545	0.09801
Q8IY84	NIM1K	Serine/threonine-protein kinase NIM1 OS=Homo sapiens OX=9606 GN=NIM1K PE=1 SV=1 - [NIM1_HUMAN]	Rare	0.0454545	0.09711
P46940	IQGAP1	Ras GTPase-activating-like protein IQGAP1 OS=Homo sapiens OX=9606 GN=IQGAP1 PE=1 SV=1 - [IQGA1_HUMAN]	Rare	0.0454545	0.09698
P21333	FLNA	Filamin-A OS=Homo sapiens OX=9606 GN=FLNA PE=1 SV=4 - [FLNA_HUMAN]	Rare	0.0454545	0.09666
Q86SM8	MRGPRE	Mas-related G-protein coupled receptor member E OS=Homo sapiens OX=9606 GN=MRGPRE PE=2 SV=3 - [MRGRE_HUMAN]	Rare	0.0454545	0.0962
Q9H172	ABCG4	ATP-binding cassette sub-family G member 4 OS=Homo sapiens OX=9606 GN=ABCG4 PE=1 SV=2 - [ABCG4_HUMAN]	Rare	0.0454545	0.09498
Q9QC07	ERVK-18	Endogenous retrovirus group K member 18 Pol protein OS=Homo sapiens OX=9606 GN=ERVK-18 PE=3 SV=2 - [POK18_HUMAN]	Rare	0.0454545	0.09375
Q86YL7	PDPN	Podoplanin OS=Homo sapiens OX=9606 GN=PDPN PE=1 SV=3 - [PDPN_HUMAN]	Rare	0.0454545	0.09362
A0A576	TRBV3-1	T cell receptor beta variable 3-1 OS=Homo sapiens OX=9606 GN=TRBV3-1 PE=3 SV=1 - [TVB31_HUMAN]	Rare	0.0454545	0.0933
Q8IXU6	SLC35F2	Solute carrier family 35 member F2 OS=Homo sapiens OX=9606 GN=SLC35F2 PE=1 SV=1 - [S35F2_HUMAN]	Rare	0.0454545	0.09278
O60240	PLIN1	Perilipin-1 OS=Homo sapiens OX=9606 GN=PLIN1 PE=1 SV=2 - [PLIN1_HUMAN]	Rare	0.0454545	0.09252
P48539	PCP4	Calmodulin regulator protein PCP4 OS=Homo sapiens OX=9606 GN=PCP4 PE=1 SV=3 - [PCP4_HUMAN]	Rare	0.0454545	0.09059
Q9BVR0	HERC2P3	Putative HERC2-like protein 3 OS=Homo sapiens OX=9606 GN=HERC2P3 PE=5 SV=2 - [HRC23_HUMAN]	Rare	0.0454545	0.08878
Q6KC79	NIPBL	Nipped-B-like protein OS=Homo sapiens OX=9606 GN=NIPBL PE=1 SV=2 - [NIPBL_HUMAN]	Rare	0.0454545	0.08852
Q8IVF5	TIAM2	T-lymphoma invasion and metastasis-inducing protein 2 OS=Homo sapiens OX=9606 GN=TIAM2 PE=2 SV=4 - [TIAM2_HUMAN]	Rare	0.0454545	0.088
P54132	BLM	Bloom syndrome protein OS=Homo sapiens OX=9606 GN=BLM PE=1 SV=1 - [BLM_HUMAN]	Rare	0.0454545	0.08652
Q92674	CENPI	Centromere protein I OS=Homo sapiens OX=9606 GN=CENPI PE=1 SV=2 - [CENPI_HUMAN]	Rare	0.0454545	0.08626
Q9HC84	MUC5B	Mucin-5B OS=Homo sapiens OX=9606 GN=MUC5B PE=1 SV=3 - [MUC5B_HUMAN]	Rare	0.0454545	0.08549
Q92611	EDEM1	ER degradation-enhancing alpha-mannosidase-like protein 1 OS=Homo sapiens OX=9606 GN=EDEM1 PE=1 SV=1 - [EDEM1_HUMAN]	Rare	0.0454545	0.08407
Q9NSD7	RXFP3	Relaxin-3 receptor 1 OS=Homo sapiens OX=9606 GN=RXFP3 PE=1 SV=1 - [RL3R1_HUMAN]	Rare	0.0454545	0.08374
P07900	HSP90AA1	Heat shock protein HSP 90-alpha OS=Homo sapiens OX=9606 GN=HSP90AA1 PE=1 SV=5 - [HS90A_HUMAN]	Rare	0.0454545	0.08368
Q96F81	DISP1	Protein dispatched homolog 1 OS=Homo sapiens OX=9606 GN=DISP1 PE=1 SV=3 - [DISP1_HUMAN]	Rare	0.0454545	0.08316
Q8WXE9	STON2	Stonin-2 OS=Homo sapiens OX=9606 GN=STON2 PE=1 SV=1 - [STON2_HUMAN]	Rare	0.0454545	0.08226
Q16537	PPP2R5E	Serine/threonine-protein phosphatase 2A 56 kDa regulatory subunit epsilon isoform OS=Homo sapiens OX=9606 GN=PPP2R5E PE=1 SV=1 - [2A5E_HUMAN]	Rare	0.0454545	0.08187
Q99797	MIPEP	Mitochondrial intermediate peptidase OS=Homo sapiens OX=9606 GN=MIPEP PE=1 SV=2 - [MIPEP_HUMAN]	Rare	0.0454545	0.08174
Q86T65	DAAM2	Disheveled-associated activator of morphogenesis 2 OS=Homo sapiens OX=9606 GN=DAAM2 PE=1 SV=3 - [DAAM2_HUMAN]	Rare	0.0454545	0.08161
O94779	CNTN5	Contactin-5 OS=Homo sapiens OX=9606 GN=CNTN5 PE=1 SV=2 - [CNTN5_HUMAN]	Rare	0.0454545	0.08148
Q5VWN6	TASOR2	Protein TASOR 2 OS=Homo sapiens OX=9606 GN=TASOR2 PE=1 SV=1 - [TASO2_HUMAN]	Rare	0.0454545	0.08122
Q702N8	XIRP1	Xin actin-binding repeat-containing protein 1 OS=Homo sapiens OX=9606 GN=XIRP1 PE=1 SV=1 - [XIRP1_HUMAN]	Rare	0.0454545	0.08084
P69849	NOMO3	Nodal modulator 3 OS=Homo sapiens OX=9606 GN=NOMO3 PE=1 SV=2 - [NOMO3_HUMAN]	Rare	0.0454545	0.08058
Q8IYA6	CKAP2L	Cytoskeleton-associated protein 2-like OS=Homo sapiens OX=9606 GN=CKAP2L PE=1 SV=4 - [CKP2L_HUMAN]	Rare	0.0454545	0.07967
Q8N228	SCML4	Sex comb on midleg-like protein 4 OS=Homo sapiens OX=9606 GN=SCML4 PE=1 SV=2 - [SCML4_HUMAN]	Rare	0.0454545	0.07955
Q9NRI5	DISC1	Disrupted in schizophrenia 1 protein OS=Homo sapiens OX=9606 GN=DISC1 PE=1 SV=3 - [DISC1_HUMAN]	Rare	0.0454545	0.07948
Q96PZ7	CSMD1	CUB and sushi domain-containing protein 1 OS=Homo sapiens OX=9606 GN=CSMD1 PE=1 SV=3 - [CSMD1_HUMAN]	Rare	0.0454545	0.07935
P17301	ITGA2	Integrin alpha-2 OS=Homo sapiens OX=9606 GN=ITGA2 PE=1 SV=1 - [ITA2_HUMAN]	Rare	0.0454545	0.07896
Q96CN9	GCC1	GRIP and coiled-coil domain-containing protein 1 OS=Homo sapiens OX=9606 GN=GCC1 PE=1 SV=1 - [GCC1_HUMAN]	Rare	0.0454545	0.07864
Q96PV7	FAM193B	Protein FAM193B OS=Homo sapiens OX=9606 GN=FAM193B PE=1 SV=3 - [F193B_HUMAN]	Rare	0.0454545	0.07845
P48448	ALDH3B2	Aldehyde dehydrogenase family 3 member B2 OS=Homo sapiens OX=9606 GN=ALDH3B2 PE=2 SV=3 - [AL3B2_HUMAN]	Rare	0.0454545	0.07819
P07996	THBS1	Thrombospondin-1 OS=Homo sapiens OX=9606 GN=THBS1 PE=1 SV=2 - [TSP1_HUMAN]	Rare	0.0454545	0.07696
Q02505	MUC3A	Mucin-3A OS=Homo sapiens OX=9606 GN=MUC3A PE=1 SV=3 - [MUC3A_HUMAN]	Rare	0.0454545	0.07696
Q14833	GRM4	Metabotropic glutamate receptor 4 OS=Homo sapiens OX=9606 GN=GRM4 PE=2 SV=1 - [GRM4_HUMAN]	Rare	0.0454545	0.0769
Q9NUL3	STAU2	Double-stranded RNA-binding protein Staufen homolog 2 OS=Homo sapiens OX=9606 GN=STAU2 PE=1 SV=2 - [STAU2_HUMAN]	Rare	0.0454545	0.07645
P22792	CPN2	Carboxypeptidase N subunit 2 OS=Homo sapiens OX=9606 GN=CPN2 PE=1 SV=3 - [CPN2_HUMAN]	Rare	0.0454545	0.07599
Q9Y2L5	TRAPPC8	Trafficking protein particle complex subunit 8 OS=Homo sapiens OX=9606 GN=TRAPPC8 PE=1 SV=2 - [TPPC8_HUMAN]	Rare	0.0454545	0.07599
Q9BYT9	ANO3	Anoctamin-3 OS=Homo sapiens OX=9606 GN=ANO3 PE=1 SV=2 - [ANO3_HUMAN]	Rare	0.0454545	0.0758
Q9Y6F8	CDY1	Testis-specific chromodomain protein Y 1 OS=Homo sapiens OX=9606 GN=CDY1 PE=1 SV=1 - [CDY1_HUMAN]	Rare	0.0454545	0.07574
Q12873	CHD3	Chromodomain-helicase-DNA-binding protein 3 OS=Homo sapiens OX=9606 GN=CHD3 PE=1 SV=3 - [CHD3_HUMAN]	Rare	0.0454545	0.07528
O96018	APBA3	Amyloid-beta A4 precursor protein-binding family A member 3 OS=Homo sapiens OX=9606 GN=APBA3 PE=1 SV=1 - [APBA3_HUMAN]	Rare	0.0454545	0.07464
Q96JQ0	DCHS1	Protocadherin-16 OS=Homo sapiens OX=9606 GN=DCHS1 PE=1 SV=1 - [PCD16_HUMAN]	Rare	0.0454545	0.07444
Q14191	WRN	Werner syndrome ATP-dependent helicase OS=Homo sapiens OX=9606 GN=WRN PE=1 SV=2 - [WRN_HUMAN]	Rare	0.0454545	0.07361
Q13107	USP4	Ubiquitin carboxyl-terminal hydrolase 4 OS=Homo sapiens OX=9606 GN=USP4 PE=1 SV=3 - [UBP4_HUMAN]	Rare	0.0454545	0.07322
Q15438	CYTH1	Cytohesin-1 OS=Homo sapiens OX=9606 GN=CYTH1 PE=1 SV=1 - [CYH1_HUMAN]	Rare	0.0454545	0.07309
P17174	GOT1	Aspartate aminotransferase, cytoplasmic OS=Homo sapiens OX=9606 GN=GOT1 PE=1 SV=3 - [AATC_HUMAN]	Rare	0.0454545	0.0727
Q9NVA1	UQCC1	Ubiquinol-cytochrome-c reductase complex assembly factor 1 OS=Homo sapiens OX=9606 GN=UQCC1 PE=1 SV=3 - [UQCC1_HUMAN]	Rare	0.0454545	0.07186
O95059	RPP14	Ribonuclease P protein subunit p14 OS=Homo sapiens OX=9606 GN=RPP14 PE=1 SV=3 - [RPP14_HUMAN]	Rare	0.0454545	0.07128
Q7L576	CYFIP1	Cytoplasmic FMR1-interacting protein 1 OS=Homo sapiens OX=9606 GN=CYFIP1 PE=1 SV=1 - [CYFP1_HUMAN]	Rare	0.0454545	0.07076
Q7Z442	PKD1L2	Polycystic kidney disease protein 1-like 2 OS=Homo sapiens OX=9606 GN=PKD1L2 PE=1 SV=5 - [PK1L2_HUMAN]	Rare	0.0454545	0.07064
Q12931	TRAP1	Heat shock protein 75 kDa, mitochondrial OS=Homo sapiens OX=9606 GN=TRAP1 PE=1 SV=3 - [TRAP1_HUMAN]	Rare	0.0454545	0.07025
B2RXH8	HNRNPCL2	Heterogeneous nuclear ribonucleoprotein C-like 2 OS=Homo sapiens OX=9606 GN=HNRNPCL2 PE=1 SV=1 - [HNRC2_HUMAN]	Rare	0.0454545	0.07018
Q8TAG9	EXOC6	Exocyst complex component 6 OS=Homo sapiens OX=9606 GN=EXOC6 PE=1 SV=3 - [EXOC6_HUMAN]	Rare	0.0454545	0.07018
Q9NUW8	TDP1	Tyrosyl-DNA phosphodiesterase 1 OS=Homo sapiens OX=9606 GN=TDP1 PE=1 SV=2 - [TYDP1_HUMAN]	Rare	0.0454545	0.07012
C4AMC7	WASH3P	Putative WAS protein family homolog 3 OS=Homo sapiens OX=9606 GN=WASH3P PE=1 SV=2 - [WASH3_HUMAN]	Rare	0.0454545	0.06999
Q4ADV7	RIC1	Guanine nucleotide exchange factor subunit RIC1 OS=Homo sapiens OX=9606 GN=RIC1 PE=1 SV=2 - [RIC1_HUMAN]	Rare	0.0454545	0.06999
Q15147	PLCB4	1-phosphatidylinositol 4,5-bisphosphate phosphodiesterase beta-4 OS=Homo sapiens OX=9606 GN=PLCB4 PE=1 SV=3 - [PLCB4_HUMAN]	Rare	0.0454545	0.06986
O43719	HTATSF1	HIV Tat-specific factor 1 OS=Homo sapiens OX=9606 GN=HTATSF1 PE=1 SV=1 - [HTSF1_HUMAN]	Rare	0.0454545	0.06954
Q969V3	NCLN	Nicalin OS=Homo sapiens OX=9606 GN=NCLN PE=1 SV=2 - [NCLN_HUMAN]	Rare	0.0454545	0.06934
O43157	PLXNB1	Plexin-B1 OS=Homo sapiens OX=9606 GN=PLXNB1 PE=1 SV=3 - [PLXB1_HUMAN]	Rare	0.0454545	0.06902
P35658	NUP214	Nuclear pore complex protein Nup214 OS=Homo sapiens OX=9606 GN=NUP214 PE=1 SV=2 - [NU214_HUMAN]	Rare	0.0454545	0.06902
Q7L590	MCM10	Protein MCM10 homolog OS=Homo sapiens OX=9606 GN=MCM10 PE=1 SV=2 - [MCM10_HUMAN]	Rare	0.0454545	0.06896
Q8WXI2	CNKSR2	Connector enhancer of kinase suppressor of ras 2 OS=Homo sapiens OX=9606 GN=CNKSR2 PE=1 SV=1 - [CNKR2_HUMAN]	Rare	0.0454545	0.06831
Q58FF8	HSP90AB2P	Putative heat shock protein HSP 90-beta 2 OS=Homo sapiens OX=9606 GN=HSP90AB2P PE=1 SV=2 - [H90B2_HUMAN]	Rare	0.0454545	0.06799
Q8WUY3	PRUNE2	Protein prune homolog 2 OS=Homo sapiens OX=9606 GN=PRUNE2 PE=1 SV=3 - [PRUN2_HUMAN]	Rare	0.0454545	0.06779
Q92576	PHF3	PHD finger protein 3 OS=Homo sapiens OX=9606 GN=PHF3 PE=1 SV=3 - [PHF3_HUMAN]	Rare	0.0454545	0.06767
Q9P1Z9	CCDC180	Coiled-coil domain-containing protein 180 OS=Homo sapiens OX=9606 GN=CCDC180 PE=2 SV=3 - [CC180_HUMAN]	Rare	0.0454545	0.06741
Q5T2S8	ARMC4	Armadillo repeat-containing protein 4 OS=Homo sapiens OX=9606 GN=ARMC4 PE=1 SV=1 - [ARMC4_HUMAN]	Rare	0.0454545	0.06702
Q14524	SCN5A	Sodium channel protein type 5 subunit alpha OS=Homo sapiens OX=9606 GN=SCN5A PE=1 SV=2 - [SCN5A_HUMAN]	Rare	0.0454545	0.0667
Q9GZS0	DNAI2	Dynein intermediate chain 2, axonemal OS=Homo sapiens OX=9606 GN=DNAI2 PE=1 SV=2 - [DNAI2_HUMAN]	Rare	0.0454545	0.06586
Q69YI7	NAIF1	Nuclear apoptosis-inducing factor 1 OS=Homo sapiens OX=9606 GN=NAIF1 PE=1 SV=1 - [NAIF1_HUMAN]	Rare	0.0454545	0.06566
Q9ULI1	NWD2	NACHT and WD repeat domain-containing protein 2 OS=Homo sapiens OX=9606 GN=NWD2 PE=2 SV=3 - [NWD2_HUMAN]	Rare	0.0454545	0.06547
Q9NVH0	EXD2	Exonuclease 3'-5' domain-containing protein 2 OS=Homo sapiens OX=9606 GN=EXD2 PE=1 SV=2 - [EXD2_HUMAN]	Rare	0.0454545	0.06541
Q00610	CLTC	Clathrin heavy chain 1 OS=Homo sapiens OX=9606 GN=CLTC PE=1 SV=5 - [CLH1_HUMAN]	Rare	0.0454545	0.06534
Q8TED9	AFAP1L1	Actin filament-associated protein 1-like 1 OS=Homo sapiens OX=9606 GN=AFAP1L1 PE=1 SV=2 - [AF1L1_HUMAN]	Rare	0.0454545	0.06528
O75884	RBBP9	Serine hydrolase RBBP9 OS=Homo sapiens OX=9606 GN=RBBP9 PE=1 SV=2 - [RBBP9_HUMAN]	Rare	0.0454545	0.06508
O95803	NDST3	Bifunctional heparan sulfate N-deacetylase/N-sulfotransferase 3 OS=Homo sapiens OX=9606 GN=NDST3 PE=2 SV=1 - [NDST3_HUMAN]	Rare	0.0454545	0.06508
Q9UPZ9	CILK1	Serine/threonine-protein kinase ICK OS=Homo sapiens OX=9606 GN=CILK1 PE=1 SV=1 - [CILK1_HUMAN]	Rare	0.0454545	0.06495
Q8NGS5	OR13C4	Olfactory receptor 13C4 OS=Homo sapiens OX=9606 GN=OR13C4 PE=3 SV=1 - [O13C4_HUMAN]	Rare	0.0454545	0.06476
O75448	MED24	Mediator of RNA polymerase II transcription subunit 24 OS=Homo sapiens OX=9606 GN=MED24 PE=1 SV=1 - [MED24_HUMAN]	Rare	0.0454545	0.06444
Q9Y5I4	PCDHAC2	Protocadherin alpha-C2 OS=Homo sapiens OX=9606 GN=PCDHAC2 PE=2 SV=1 - [PCDC2_HUMAN]	Rare	0.0454545	0.06418
Q2TAA8	TSNAXIP1	Translin-associated factor X-interacting protein 1 OS=Homo sapiens OX=9606 GN=TSNAXIP1 PE=1 SV=1 - [TXIP1_HUMAN]	Rare	0.0454545	0.06405
O95573	ACSL3	Long-chain-fatty-acid--CoA ligase 3 OS=Homo sapiens OX=9606 GN=ACSL3 PE=1 SV=3 - [ACSL3_HUMAN]	Rare	0.0454545	0.0636
Q9Y512	SAMM50	Sorting and assembly machinery component 50 homolog OS=Homo sapiens OX=9606 GN=SAMM50 PE=1 SV=3 - [SAM50_HUMAN]	Rare	0.0454545	0.06353
Q15019	SEPTIN2	Septin-2 OS=Homo sapiens OX=9606 GN=SEPTIN2 PE=1 SV=1 - [SEPT2_HUMAN]	Rare	0.0454545	0.06347
Q13255	GRM1	Metabotropic glutamate receptor 1 OS=Homo sapiens OX=9606 GN=GRM1 PE=1 SV=3 - [GRM1_HUMAN]	Rare	0.0454545	0.06315
Q6ZP68	ATP11AUN	Putative protein ATP11AUN OS=Homo sapiens OX=9606 GN=ATP11AUN PE=2 SV=1 - [ATPUN_HUMAN]	Rare	0.0454545	0.06295
O14829	PPEF1	Serine/threonine-protein phosphatase with EF-hands 1 OS=Homo sapiens OX=9606 GN=PPEF1 PE=1 SV=1 - [PPE1_HUMAN]	Rare	0.0454545	0.06289
Q9UBS5	GABBR1	Gamma-aminobutyric acid type B receptor subunit 1 OS=Homo sapiens OX=9606 GN=GABBR1 PE=1 SV=1 - [GABR1_HUMAN]	Rare	0.0454545	0.06289
Q6WKZ4	RAB11FIP1	Rab11 family-interacting protein 1 OS=Homo sapiens OX=9606 GN=RAB11FIP1 PE=1 SV=3 - [RFIP1_HUMAN]	Rare	0.0454545	0.06276
Q92889	ERCC4	DNA repair endonuclease XPF OS=Homo sapiens OX=9606 GN=ERCC4 PE=1 SV=3 - [XPF_HUMAN]	Rare	0.0454545	0.06276
Q9ULK0	GRID1	Glutamate receptor ionotropic, delta-1 OS=Homo sapiens OX=9606 GN=GRID1 PE=2 SV=2 - [GRID1_HUMAN]	Rare	0.0454545	0.06276
Q8IV36	HID1	Protein HID1 OS=Homo sapiens OX=9606 GN=HID1 PE=1 SV=1 - [HID1_HUMAN]	Rare	0.0454545	0.0625
Q02846	GUCY2D	Retinal guanylyl cyclase 1 OS=Homo sapiens OX=9606 GN=GUCY2D PE=1 SV=2 - [GUC2D_HUMAN]	Rare	0.0454545	0.06237
O95789	ZMYM6	Zinc finger MYM-type protein 6 OS=Homo sapiens OX=9606 GN=ZMYM6 PE=1 SV=2 - [ZMYM6_HUMAN]	Rare	0.0454545	0.06198
P08183	ABCB1	ATP-dependent translocase ABCB1 OS=Homo sapiens OX=9606 GN=ABCB1 PE=1 SV=3 - [MDR1_HUMAN]	Rare	0.0454545	0.06173
P54753	EPHB3	Ephrin type-B receptor 3 OS=Homo sapiens OX=9606 GN=EPHB3 PE=1 SV=2 - [EPHB3_HUMAN]	Rare	0.0454545	0.06166
B7ZC32	KIF28P	Kinesin-like protein KIF28P OS=Homo sapiens OX=9606 GN=KIF28P PE=3 SV=2 - [KIF28_HUMAN]	Rare	0.0454545	0.0616
Q8WZ64	ARAP2	Arf-GAP with Rho-GAP domain, ANK repeat and PH domain-containing protein 2 OS=Homo sapiens OX=9606 GN=ARAP2 PE=1 SV=3 - [ARAP2_HUMAN]	Rare	0.0454545	0.0616
Q8IZT6	ASPM	Abnormal spindle-like microcephaly-associated protein OS=Homo sapiens OX=9606 GN=ASPM PE=1 SV=2 - [ASPM_HUMAN]	Rare	0.0454545	0.06153
Q96QT6	PHF12	PHD finger protein 12 OS=Homo sapiens OX=9606 GN=PHF12 PE=1 SV=2 - [PHF12_HUMAN]	Rare	0.0454545	0.06147
Q96JK9	MAML3	Mastermind-like protein 3 OS=Homo sapiens OX=9606 GN=MAML3 PE=1 SV=4 - [MAML3_HUMAN]	Rare	0.0454545	0.06134
Q9NV72	ZNF701	Zinc finger protein 701 OS=Homo sapiens OX=9606 GN=ZNF701 PE=1 SV=3 - [ZN701_HUMAN]	Rare	0.0454545	0.06082
Q12933	TRAF2	TNF receptor-associated factor 2 OS=Homo sapiens OX=9606 GN=TRAF2 PE=1 SV=2 - [TRAF2_HUMAN]	Rare	0.0454545	0.06069
Q3L8U1	CHD9	Chromodomain-helicase-DNA-binding protein 9 OS=Homo sapiens OX=9606 GN=CHD9 PE=1 SV=2 - [CHD9_HUMAN]	Rare	0.0454545	0.06069
Q9NPG3	UBN1	Ubinuclein-1 OS=Homo sapiens OX=9606 GN=UBN1 PE=1 SV=2 - [UBN1_HUMAN]	Rare	0.0454545	0.06056
E9PAV3	NACA	Nascent polypeptide-associated complex subunit alpha, muscle-specific form OS=Homo sapiens OX=9606 GN=NACA PE=1 SV=1 - [NACAM_HUMAN]	Rare	0.0454545	0.0605
Q16572	SLC18A3	Vesicular acetylcholine transporter OS=Homo sapiens OX=9606 GN=SLC18A3 PE=1 SV=2 - [VACHT_HUMAN]	Rare	0.0454545	0.0605
P16150	SPN	Leukosialin OS=Homo sapiens OX=9606 GN=SPN PE=1 SV=1 - [LEUK_HUMAN]	Rare	0.0454545	0.06043
Q53GS7	GLE1	Nucleoporin GLE1 OS=Homo sapiens OX=9606 GN=GLE1 PE=1 SV=2 - [GLE1_HUMAN]	Rare	0.0454545	0.06024
P51788	CLCN2	Chloride channel protein 2 OS=Homo sapiens OX=9606 GN=CLCN2 PE=1 SV=2 - [CLCN2_HUMAN]	Rare	0.0454545	0.06011
Q15459	SF3A1	Splicing factor 3A subunit 1 OS=Homo sapiens OX=9606 GN=SF3A1 PE=1 SV=1 - [SF3A1_HUMAN]	Rare	0.0454545	0.06005
P30038	ALDH4A1	Delta-1-pyrroline-5-carboxylate dehydrogenase, mitochondrial OS=Homo sapiens OX=9606 GN=ALDH4A1 PE=1 SV=3 - [AL4A1_HUMAN]	Rare	0.0454545	0.05979
Q9Y5B9	SUPT16H	FACT complex subunit SPT16 OS=Homo sapiens OX=9606 GN=SUPT16H PE=1 SV=1 - [SP16H_HUMAN]	Rare	0.0454545	0.05979
Q8WXE1	ATRIP	ATR-interacting protein OS=Homo sapiens OX=9606 GN=ATRIP PE=1 SV=1 - [ATRIP_HUMAN]	Rare	0.0454545	0.05972
Q13796	SHROOM2	Protein Shroom2 OS=Homo sapiens OX=9606 GN=SHROOM2 PE=1 SV=1 - [SHRM2_HUMAN]	Rare	0.0454545	0.05966
P16112	ACAN	Aggrecan core protein OS=Homo sapiens OX=9606 GN=ACAN PE=1 SV=3 - [PGCA_HUMAN]	Rare	0.0454545	0.05953
P28370	SMARCA1	Probable global transcription activator SNF2L1 OS=Homo sapiens OX=9606 GN=SMARCA1 PE=1 SV=2 - [SMCA1_HUMAN]	Rare	0.0454545	0.05953
Q9NVE5	USP40	Ubiquitin carboxyl-terminal hydrolase 40 OS=Homo sapiens OX=9606 GN=USP40 PE=1 SV=3 - [UBP40_HUMAN]	Rare	0.0454545	0.05953
Q07617	SPAG1	Sperm-associated antigen 1 OS=Homo sapiens OX=9606 GN=SPAG1 PE=1 SV=3 - [SPAG1_HUMAN]	Rare	0.0454545	0.05934
Q00872	MYBPC1	Myosin-binding protein C, slow-type OS=Homo sapiens OX=9606 GN=MYBPC1 PE=1 SV=2 - [MYPC1_HUMAN]	Rare	0.0454545	0.05927
Q96GM8	TOE1	Target of EGR1 protein 1 OS=Homo sapiens OX=9606 GN=TOE1 PE=1 SV=1 - [TOE1_HUMAN]	Rare	0.0454545	0.05927
Q8TAL6	FIBIN	Fin bud initiation factor homolog OS=Homo sapiens OX=9606 GN=FIBIN PE=1 SV=1 - [FIBIN_HUMAN]	Rare	0.0454545	0.05914
O43933	PEX1	Peroxisome biogenesis factor 1 OS=Homo sapiens OX=9606 GN=PEX1 PE=1 SV=1 - [PEX1_HUMAN]	Rare	0.0454545	0.05908
Q96M93	ADAD1	Adenosine deaminase domain-containing protein 1 OS=Homo sapiens OX=9606 GN=ADAD1 PE=2 SV=1 - [ADAD1_HUMAN]	Rare	0.0454545	0.05908
Q68CZ2	TNS3	Tensin-3 OS=Homo sapiens OX=9606 GN=TNS3 PE=1 SV=2 - [TENS3_HUMAN]	Rare	0.0454545	0.05888
P78382	SLC35A1	CMP-sialic acid transporter OS=Homo sapiens OX=9606 GN=SLC35A1 PE=1 SV=1 - [S35A1_HUMAN]	Rare	0.0454545	0.05882
Q9BXJ2	C1QTNF7	Complement C1q tumor necrosis factor-related protein 7 OS=Homo sapiens OX=9606 GN=C1QTNF7 PE=2 SV=1 - [C1QT7_HUMAN]	Rare	0.0454545	0.0585
A2RUB1	MEIOC	Meiosis-specific coiled-coil domain-containing protein MEIOC OS=Homo sapiens OX=9606 GN=MEIOC PE=2 SV=3 - [MEIOC_HUMAN]	Rare	0.0454545	0.05843
Q9UM73	ALK	ALK tyrosine kinase receptor OS=Homo sapiens OX=9606 GN=ALK PE=1 SV=3 - [ALK_HUMAN]	Rare	0.0454545	0.05843
O43379	WDR62	WD repeat-containing protein 62 OS=Homo sapiens OX=9606 GN=WDR62 PE=1 SV=4 - [WDR62_HUMAN]	Rare	0.0454545	0.05837
Q7Z5J8	ANKAR	Ankyrin and armadillo repeat-containing protein OS=Homo sapiens OX=9606 GN=ANKAR PE=2 SV=3 - [ANKAR_HUMAN]	Rare	0.0454545	0.05837
P35670	ATP7B	Copper-transporting ATPase 2 OS=Homo sapiens OX=9606 GN=ATP7B PE=1 SV=4 - [ATP7B_HUMAN]	Rare	0.0454545	0.05824
A6NE52	WDR97	WD repeat-containing protein 97 OS=Homo sapiens OX=9606 GN=WDR97 PE=2 SV=2 - [WDR97_HUMAN]	Rare	0.0454545	0.05811
C9J202	ALG1L2	Putative glycosyltransferase ALG1L2 OS=Homo sapiens OX=9606 GN=ALG1L2 PE=3 SV=1 - [AG1L2_HUMAN]	Rare	0.0454545	0.05811
Q8NBW4	SLC38A9	Sodium-coupled neutral amino acid transporter 9 OS=Homo sapiens OX=9606 GN=SLC38A9 PE=1 SV=2 - [S38A9_HUMAN]	Rare	0.0454545	0.05811
O43296	ZNF264	Zinc finger protein 264 OS=Homo sapiens OX=9606 GN=ZNF264 PE=1 SV=1 - [ZN264_HUMAN]	Rare	0.0454545	0.05772
P15941	MUC1	Mucin-1 OS=Homo sapiens OX=9606 GN=MUC1 PE=1 SV=3 - [MUC1_HUMAN]	Rare	0.0454545	0.05759
Q9Y4K1	CRYBG1	Beta/gamma crystallin domain-containing protein 1 OS=Homo sapiens OX=9606 GN=CRYBG1 PE=1 SV=3 - [CRBG1_HUMAN]	Rare	0.0454545	0.05759
Q96ID5	IGSF21	Immunoglobulin superfamily member 21 OS=Homo sapiens OX=9606 GN=IGSF21 PE=2 SV=1 - [IGS21_HUMAN]	Rare	0.0454545	0.05746
Q5T3F8	TMEM63B	CSC1-like protein 2 OS=Homo sapiens OX=9606 GN=TMEM63B PE=1 SV=1 - [CSCL2_HUMAN]	Rare	0.0454545	0.0574
Q9Y4G6	TLN2	Talin-2 OS=Homo sapiens OX=9606 GN=TLN2 PE=1 SV=4 - [TLN2_HUMAN]	Rare	0.0454545	0.05733
O15018	PDZD2	PDZ domain-containing protein 2 OS=Homo sapiens OX=9606 GN=PDZD2 PE=1 SV=4 - [PDZD2_HUMAN]	Rare	0.0454545	0.05721
Q9C0F0	ASXL3	Putative Polycomb group protein ASXL3 OS=Homo sapiens OX=9606 GN=ASXL3 PE=2 SV=3 - [ASXL3_HUMAN]	Rare	0.0454545	0.05721
O43837	IDH3B	Isocitrate dehydrogenase [NAD] subunit beta, mitochondrial OS=Homo sapiens OX=9606 GN=IDH3B PE=1 SV=2 - [IDH3B_HUMAN]	Rare	0.0454545	0.05708
Q9P2E7	PCDH10	Protocadherin-10 OS=Homo sapiens OX=9606 GN=PCDH10 PE=1 SV=2 - [PCD10_HUMAN]	Rare	0.0454545	0.05701
P80108	GPLD1	Phosphatidylinositol-glycan-specific phospholipase D OS=Homo sapiens OX=9606 GN=GPLD1 PE=1 SV=3 - [PHLD_HUMAN]	Rare	0.0454545	0.05695
Q8TE59	ADAMTS19	A disintegrin and metalloproteinase with thrombospondin motifs 19 OS=Homo sapiens OX=9606 GN=ADAMTS19 PE=2 SV=2 - [ATS19_HUMAN]	Rare	0.0454545	0.05695
Q68CR1	SEL1L3	Protein sel-1 homolog 3 OS=Homo sapiens OX=9606 GN=SEL1L3 PE=1 SV=2 - [SE1L3_HUMAN]	Rare	0.0454545	0.05682
P78357	CNTNAP1	Contactin-associated protein 1 OS=Homo sapiens OX=9606 GN=CNTNAP1 PE=1 SV=1 - [CNTP1_HUMAN]	Rare	0.0454545	0.05675
Q9BZD4	NUF2	Kinetochore protein Nuf2 OS=Homo sapiens OX=9606 GN=NUF2 PE=1 SV=2 - [NUF2_HUMAN]	Rare	0.0454545	0.05669
Q33E94	RFX4	Transcription factor RFX4 OS=Homo sapiens OX=9606 GN=RFX4 PE=1 SV=2 - [RFX4_HUMAN]	Rare	0.0454545	0.05656
Q6Q0C1	SLC25A47	Solute carrier family 25 member 47 OS=Homo sapiens OX=9606 GN=SLC25A47 PE=2 SV=1 - [S2547_HUMAN]	Rare	0.0454545	0.05656
P54105	CLNS1A	Methylosome subunit pICln OS=Homo sapiens OX=9606 GN=CLNS1A PE=1 SV=1 - [ICLN_HUMAN]	Rare	0.0454545	0.0565
Q8N138	ORMDL3	ORM1-like protein 3 OS=Homo sapiens OX=9606 GN=ORMDL3 PE=1 SV=1 - [ORML3_HUMAN]	Rare	0.0454545	0.0565
Q9P2N4	ADAMTS9	A disintegrin and metalloproteinase with thrombospondin motifs 9 OS=Homo sapiens OX=9606 GN=ADAMTS9 PE=1 SV=4 - [ATS9_HUMAN]	Rare	0.0454545	0.0565
Q16531	DDB1	DNA damage-binding protein 1 OS=Homo sapiens OX=9606 GN=DDB1 PE=1 SV=1 - [DDB1_HUMAN]	Rare	0.0454545	0.05643
Q6ZU65	UBN2	Ubinuclein-2 OS=Homo sapiens OX=9606 GN=UBN2 PE=1 SV=2 - [UBN2_HUMAN]	Rare	0.0454545	0.05617
Q9H9A6	LRRC40	Leucine-rich repeat-containing protein 40 OS=Homo sapiens OX=9606 GN=LRRC40 PE=1 SV=1 - [LRC40_HUMAN]	Rare	0.0454545	0.05611
Q6ZRI0	OTOG	Otogelin OS=Homo sapiens OX=9606 GN=OTOG PE=1 SV=3 - [OTOG_HUMAN]	Rare	0.0454545	0.05585
Q3KNV8	PCGF3	Polycomb group RING finger protein 3 OS=Homo sapiens OX=9606 GN=PCGF3 PE=1 SV=1 - [PCGF3_HUMAN]	Rare	0.0454545	0.05579
Q9BSE5	AGMAT	Agmatinase, mitochondrial OS=Homo sapiens OX=9606 GN=AGMAT PE=1 SV=2 - [SPEB_HUMAN]	Rare	0.0454545	0.0554
Q9BWL3	C1orf43	Protein C1orf43 OS=Homo sapiens OX=9606 GN=C1orf43 PE=2 SV=1 - [CA043_HUMAN]	Rare	0.0454545	0.05527
Q6ZMD2	SPNS3	Protein spinster homolog 3 OS=Homo sapiens OX=9606 GN=SPNS3 PE=1 SV=2 - [SPNS3_HUMAN]	Rare	0.0454545	0.05507
Q6ISB3	GRHL2	Grainyhead-like protein 2 homolog OS=Homo sapiens OX=9606 GN=GRHL2 PE=1 SV=1 - [GRHL2_HUMAN]	Rare	0.0454545	0.05495
P40189	IL6ST	Interleukin-6 receptor subunit beta OS=Homo sapiens OX=9606 GN=IL6ST PE=1 SV=2 - [IL6RB_HUMAN]	Rare	0.0454545	0.05488
Q7Z2T5	TRMT1L	TRMT1-like protein OS=Homo sapiens OX=9606 GN=TRMT1L PE=1 SV=2 - [TRM1L_HUMAN]	Rare	0.0454545	0.05436
Q96LR9	APOLD1	Apolipoprotein L domain-containing protein 1 OS=Homo sapiens OX=9606 GN=APOLD1 PE=2 SV=2 - [APLD1_HUMAN]	Rare	0.0454545	0.05436
Q2M2H8	MGAM2	Probable maltase-glucoamylase 2 OS=Homo sapiens OX=9606 GN=MGAM2 PE=2 SV=3 - [MGAL_HUMAN]	Rare	0.0454545	0.0543
Q12774	ARHGEF5	Rho guanine nucleotide exchange factor 5 OS=Homo sapiens OX=9606 GN=ARHGEF5 PE=1 SV=3 - [ARHG5_HUMAN]	Rare	0.0454545	0.05424
Q68CP9	ARID2	AT-rich interactive domain-containing protein 2 OS=Homo sapiens OX=9606 GN=ARID2 PE=1 SV=2 - [ARID2_HUMAN]	Rare	0.0454545	0.05424
O95466	FMNL1	Formin-like protein 1 OS=Homo sapiens OX=9606 GN=FMNL1 PE=1 SV=3 - [FMNL1_HUMAN]	Rare	0.0454545	0.05417
Q05682	CALD1	Caldesmon OS=Homo sapiens OX=9606 GN=CALD1 PE=1 SV=3 - [CALD1_HUMAN]	Rare	0.0454545	0.05411
Q14126	DSG2	Desmoglein-2 OS=Homo sapiens OX=9606 GN=DSG2 PE=1 SV=2 - [DSG2_HUMAN]	Rare	0.0454545	0.05411
P37231	PPARG	Peroxisome proliferator-activated receptor gamma OS=Homo sapiens OX=9606 GN=PPARG PE=1 SV=3 - [PPARG_HUMAN]	Rare	0.0454545	0.05404
Q9Y4W6	AFG3L2	AFG3-like protein 2 OS=Homo sapiens OX=9606 GN=AFG3L2 PE=1 SV=2 - [AFG32_HUMAN]	Rare	0.0454545	0.05398
Q96L73	NSD1	Histone-lysine N-methyltransferase, H3 lysine-36 specific OS=Homo sapiens OX=9606 GN=NSD1 PE=1 SV=1 - [NSD1_HUMAN]	Rare	0.0454545	0.05391
P19367	HK1	Hexokinase-1 OS=Homo sapiens OX=9606 GN=HK1 PE=1 SV=3 - [HXK1_HUMAN]	Rare	0.0454545	0.05385
Q9NQC7	CYLD	Ubiquitin carboxyl-terminal hydrolase CYLD OS=Homo sapiens OX=9606 GN=CYLD PE=1 SV=1 - [CYLD_HUMAN]	Rare	0.0454545	0.05385
O14924	RGS12	Regulator of G-protein signaling 12 OS=Homo sapiens OX=9606 GN=RGS12 PE=1 SV=1 - [RGS12_HUMAN]	Rare	0.0454545	0.05365
Q5VYM1	C9orf131	Uncharacterized protein C9orf131 OS=Homo sapiens OX=9606 GN=C9orf131 PE=2 SV=3 - [CI131_HUMAN]	Rare	0.0454545	0.05365
Q96AE7	TTC17	Tetratricopeptide repeat protein 17 OS=Homo sapiens OX=9606 GN=TTC17 PE=1 SV=1 - [TTC17_HUMAN]	Rare	0.0454545	0.05353
Q8IWV2	CNTN4	Contactin-4 OS=Homo sapiens OX=9606 GN=CNTN4 PE=1 SV=1 - [CNTN4_HUMAN]	Rare	0.0454545	0.0532
Q9NZU1	FLRT1	Leucine-rich repeat transmembrane protein FLRT1 OS=Homo sapiens OX=9606 GN=FLRT1 PE=1 SV=3 - [FLRT1_HUMAN]	Rare	0.0454545	0.05294
A5YKK6	CNOT1	CCR4-NOT transcription complex subunit 1 OS=Homo sapiens OX=9606 GN=CNOT1 PE=1 SV=2 - [CNOT1_HUMAN]	Rare	0.0454545	0.05282
A6NMZ5	OR4C45	Olfactory receptor 4C45 OS=Homo sapiens OX=9606 GN=OR4C45 PE=3 SV=1 - [O4C45_HUMAN]	Rare	0.0454545	0.05282
O95832	CLDN1	Claudin-1 OS=Homo sapiens OX=9606 GN=CLDN1 PE=1 SV=1 - [CLD1_HUMAN]	Rare	0.0454545	0.05269
Q16821	PPP1R3A	Protein phosphatase 1 regulatory subunit 3A OS=Homo sapiens OX=9606 GN=PPP1R3A PE=1 SV=3 - [PPR3A_HUMAN]	Rare	0.0454545	0.05269
Q8IZY2	ABCA7	Phospholipid-transporting ATPase ABCA7 OS=Homo sapiens OX=9606 GN=ABCA7 PE=1 SV=3 - [ABCA7_HUMAN]	Rare	0.0454545	0.05269
A0A1B0GUJ8	PNMA8C	Paraneoplastic antigen-like protein 8C OS=Homo sapiens OX=9606 GN=PNMA8C PE=3 SV=1 - [PNM8C_HUMAN]	Rare	0.0454545	0.05256
Q6NW34	NEPRO	Nucleolus and neural progenitor protein OS=Homo sapiens OX=9606 GN=NEPRO PE=1 SV=3 - [NEPRO_HUMAN]	Rare	0.0454545	0.05256
Q8WXX7	AUTS2	Autism susceptibility gene 2 protein OS=Homo sapiens OX=9606 GN=AUTS2 PE=1 SV=1 - [AUTS2_HUMAN]	Rare	0.0454545	0.05256
Q2M389	WASHC4	WASH complex subunit 4 OS=Homo sapiens OX=9606 GN=WASHC4 PE=1 SV=2 - [WASC4_HUMAN]	Rare	0.0454545	0.05249
Q8NDV7	TNRC6A	Trinucleotide repeat-containing gene 6A protein OS=Homo sapiens OX=9606 GN=TNRC6A PE=1 SV=2 - [TNR6A_HUMAN]	Rare	0.0454545	0.05249
Q8NGZ0	OR2AJ1	Olfactory receptor 2AJ1 OS=Homo sapiens OX=9606 GN=OR2AJ1 PE=3 SV=1 - [O2AJ1_HUMAN]	Rare	0.0454545	0.05243
Q08379	GOLGA2	Golgin subfamily A member 2 OS=Homo sapiens OX=9606 GN=GOLGA2 PE=1 SV=3 - [GOGA2_HUMAN]	Rare	0.0454545	0.05217
Q8NFJ5	GPRC5A	Retinoic acid-induced protein 3 OS=Homo sapiens OX=9606 GN=GPRC5A PE=1 SV=2 - [RAI3_HUMAN]	Rare	0.0454545	0.05217
Q13480	GAB1	GRB2-associated-binding protein 1 OS=Homo sapiens OX=9606 GN=GAB1 PE=1 SV=2 - [GAB1_HUMAN]	Rare	0.0454545	0.05204
Q9Y2P5	SLC27A5	Bile acyl-CoA synthetase OS=Homo sapiens OX=9606 GN=SLC27A5 PE=1 SV=1 - [S27A5_HUMAN]	Rare	0.0454545	0.05204
Q15027	ACAP1	Arf-GAP with coiled-coil, ANK repeat and PH domain-containing protein 1 OS=Homo sapiens OX=9606 GN=ACAP1 PE=1 SV=1 - [ACAP1_HUMAN]	Rare	0.0454545	0.05198
Q92521	PIGB	GPI mannosyltransferase 3 OS=Homo sapiens OX=9606 GN=PIGB PE=1 SV=1 - [PIGB_HUMAN]	Rare	0.0454545	0.05191
P21281	ATP6V1B2	V-type proton ATPase subunit B, brain isoform OS=Homo sapiens OX=9606 GN=ATP6V1B2 PE=1 SV=3 - [VATB2_HUMAN]	Rare	0.0454545	0.05172
Q92794	KAT6A	Histone acetyltransferase KAT6A OS=Homo sapiens OX=9606 GN=KAT6A PE=1 SV=2 - [KAT6A_HUMAN]	Rare	0.0454545	0.05146
Q96T76	MMS19	MMS19 nucleotide excision repair protein homolog OS=Homo sapiens OX=9606 GN=MMS19 PE=1 SV=2 - [MMS19_HUMAN]	Rare	0.0454545	0.05146
Q9H7T0	CATSPERB	Cation channel sperm-associated protein subunit beta OS=Homo sapiens OX=9606 GN=CATSPERB PE=2 SV=2 - [CTSRB_HUMAN]	Rare	0.0454545	0.05146
Q96LL9	DNAJC30	DnaJ homolog subfamily C member 30, mitochondrial OS=Homo sapiens OX=9606 GN=DNAJC30 PE=1 SV=3 - [DJC30_HUMAN]	Rare	0.0454545	0.05139
Q96QS6	PSKH2	Serine/threonine-protein kinase H2 OS=Homo sapiens OX=9606 GN=PSKH2 PE=1 SV=1 - [KPSH2_HUMAN]	Rare	0.0454545	0.05139
Q9UPU5	USP24	Ubiquitin carboxyl-terminal hydrolase 24 OS=Homo sapiens OX=9606 GN=USP24 PE=1 SV=3 - [UBP24_HUMAN]	Rare	0.0454545	0.05133
Q9HBG6	IFT122	Intraflagellar transport protein 122 homolog OS=Homo sapiens OX=9606 GN=IFT122 PE=1 SV=2 - [IF122_HUMAN]	Rare	0.0454545	0.05114
Q13469	NFATC2	Nuclear factor of activated T-cells, cytoplasmic 2 OS=Homo sapiens OX=9606 GN=NFATC2 PE=1 SV=2 - [NFAC2_HUMAN]	Rare	0.0454545	0.05107
Q9GZU1	MCOLN1	Mucolipin-1 OS=Homo sapiens OX=9606 GN=MCOLN1 PE=1 SV=1 - [MCLN1_HUMAN]	Rare	0.0454545	0.05101
P38398	BRCA1	Breast cancer type 1 susceptibility protein OS=Homo sapiens OX=9606 GN=BRCA1 PE=1 SV=2 - [BRCA1_HUMAN]	Rare	0.0454545	0.05094
Q8NCR6	SMRP1	Spermatid-specific manchette-related protein 1 OS=Homo sapiens OX=9606 GN=SMRP1 PE=1 SV=2 - [SMRP1_HUMAN]	Rare	0.0454545	0.05088
Q13315	ATM	Serine-protein kinase ATM OS=Homo sapiens OX=9606 GN=ATM PE=1 SV=4 - [ATM_HUMAN]	Rare	0.0454545	0.05081
Q9NQB0	TCF7L2	Transcription factor 7-like 2 OS=Homo sapiens OX=9606 GN=TCF7L2 PE=1 SV=2 - [TF7L2_HUMAN]	Rare	0.0454545	0.05075
Q9NTJ3	SMC4	Structural maintenance of chromosomes protein 4 OS=Homo sapiens OX=9606 GN=SMC4 PE=1 SV=2 - [SMC4_HUMAN]	Rare	0.0454545	0.05068
P40925	MDH1	Malate dehydrogenase, cytoplasmic OS=Homo sapiens OX=9606 GN=MDH1 PE=1 SV=4 - [MDHC_HUMAN]	Rare	0.0454545	0.05062
Q8TDB6	DTX3L	E3 ubiquitin-protein ligase DTX3L OS=Homo sapiens OX=9606 GN=DTX3L PE=1 SV=1 - [DTX3L_HUMAN]	Rare	0.0454545	0.05056
Q8TDQ7	GNPDA2	Glucosamine-6-phosphate isomerase 2 OS=Homo sapiens OX=9606 GN=GNPDA2 PE=1 SV=1 - [GNPI2_HUMAN]	Rare	0.0454545	0.05056
Q9BWU0	SLC4A1AP	Kanadaptin OS=Homo sapiens OX=9606 GN=SLC4A1AP PE=1 SV=1 - [NADAP_HUMAN]	Rare	0.0454545	0.05023
Q9P2D3	HEATR5B	HEAT repeat-containing protein 5B OS=Homo sapiens OX=9606 GN=HEATR5B PE=1 SV=2 - [HTR5B_HUMAN]	Rare	0.0454545	0.05023
Q9UBZ9	REV1	DNA repair protein REV1 OS=Homo sapiens OX=9606 GN=REV1 PE=1 SV=1 - [REV1_HUMAN]	Rare	0.0454545	0.0501
Q9BSC4	NOL10	Nucleolar protein 10 OS=Homo sapiens OX=9606 GN=NOL10 PE=1 SV=1 - [NOL10_HUMAN]	Rare	0.0454545	0.04997
Q9UIW2	PLXNA1	Plexin-A1 OS=Homo sapiens OX=9606 GN=PLXNA1 PE=1 SV=3 - [PLXA1_HUMAN]	Rare	0.0454545	0.04997
Q8TF21	ANKRD24	Ankyrin repeat domain-containing protein 24 OS=Homo sapiens OX=9606 GN=ANKRD24 PE=2 SV=2 - [ANR24_HUMAN]	Rare	0.0454545	0.04991
P14410	SI	Sucrase-isomaltase, intestinal OS=Homo sapiens OX=9606 GN=SI PE=1 SV=6 - [SUIS_HUMAN]	Rare	0.0454545	0.04972
O43683	BUB1	Mitotic checkpoint serine/threonine-protein kinase BUB1 OS=Homo sapiens OX=9606 GN=BUB1 PE=1 SV=1 - [BUB1_HUMAN]	Rare	0.0454545	0.04965
Q9BZ72	PITPNM2	Membrane-associated phosphatidylinositol transfer protein 2 OS=Homo sapiens OX=9606 GN=PITPNM2 PE=1 SV=1 - [PITM2_HUMAN]	Rare	0.0454545	0.04965
Q9GZR1	SENP6	Sentrin-specific protease 6 OS=Homo sapiens OX=9606 GN=SENP6 PE=1 SV=2 - [SENP6_HUMAN]	Rare	0.0454545	0.04952
O43166	SIPA1L1	Signal-induced proliferation-associated 1-like protein 1 OS=Homo sapiens OX=9606 GN=SIPA1L1 PE=1 SV=4 - [SI1L1_HUMAN]	Rare	0.0454545	0.04926
Q4J6C6	PREPL	Prolyl endopeptidase-like OS=Homo sapiens OX=9606 GN=PREPL PE=1 SV=1 - [PPCEL_HUMAN]	Rare	0.0454545	0.04926
Q86XR7	TICAM2	TIR domain-containing adapter molecule 2 OS=Homo sapiens OX=9606 GN=TICAM2 PE=1 SV=1 - [TCAM2_HUMAN]	Rare	0.0454545	0.04926
Q9UIV8	SERPINB13	Serpin B13 OS=Homo sapiens OX=9606 GN=SERPINB13 PE=1 SV=2 - [SPB13_HUMAN]	Rare	0.0454545	0.04901
O43301	HSPA12A	Heat shock 70 kDa protein 12A OS=Homo sapiens OX=9606 GN=HSPA12A PE=1 SV=2 - [HS12A_HUMAN]	Rare	0.0454545	0.04894
P17014	ZNF12	Zinc finger protein 12 OS=Homo sapiens OX=9606 GN=ZNF12 PE=1 SV=3 - [ZNF12_HUMAN]	Rare	0.0454545	0.04881
Q92729	PTPRU	Receptor-type tyrosine-protein phosphatase U OS=Homo sapiens OX=9606 GN=PTPRU PE=1 SV=2 - [PTPRU_HUMAN]	Rare	0.0454545	0.04868
Q5VYJ5	MALRD1	MAM and LDL-receptor class A domain-containing protein 1 OS=Homo sapiens OX=9606 GN=MALRD1 PE=1 SV=4 - [MALR1_HUMAN]	Rare	0.0454545	0.04862
Q14151	SAFB2	Scaffold attachment factor B2 OS=Homo sapiens OX=9606 GN=SAFB2 PE=1 SV=1 - [SAFB2_HUMAN]	Rare	0.0454545	0.04855
A2VEC9	SSPOP	SCO-spondin OS=Homo sapiens OX=9606 GN=SSPOP PE=2 SV=2 - [SSPO_HUMAN]	Rare	0.0454545	0.04842
P20585	MSH3	DNA mismatch repair protein Msh3 OS=Homo sapiens OX=9606 GN=MSH3 PE=1 SV=4 - [MSH3_HUMAN]	Rare	0.0454545	0.04842
O94906	PRPF6	Pre-mRNA-processing factor 6 OS=Homo sapiens OX=9606 GN=PRPF6 PE=1 SV=1 - [PRP6_HUMAN]	Rare	0.0454545	0.0483
Q5W041	ARMC3	Armadillo repeat-containing protein 3 OS=Homo sapiens OX=9606 GN=ARMC3 PE=2 SV=2 - [ARMC3_HUMAN]	Rare	0.0454545	0.0483
Q7L1W4	LRRC8D	Volume-regulated anion channel subunit LRRC8D OS=Homo sapiens OX=9606 GN=LRRC8D PE=1 SV=1 - [LRC8D_HUMAN]	Rare	0.0454545	0.0481
P39656	DDOST	Dolichyl-diphosphooligosaccharide--protein glycosyltransferase 48 kDa subunit OS=Homo sapiens OX=9606 GN=DDOST PE=1 SV=4 - [OST48_HUMAN]	Rare	0.0454545	0.04804
Q68D51	DENND2C	DENN domain-containing protein 2C OS=Homo sapiens OX=9606 GN=DENND2C PE=1 SV=2 - [DEN2C_HUMAN]	Rare	0.0454545	0.04804
Q8WWN8	ARAP3	Arf-GAP with Rho-GAP domain, ANK repeat and PH domain-containing protein 3 OS=Homo sapiens OX=9606 GN=ARAP3 PE=1 SV=1 - [ARAP3_HUMAN]	Rare	0.0454545	0.04804
P17040	ZSCAN20	Zinc finger and SCAN domain-containing protein 20 OS=Homo sapiens OX=9606 GN=ZSCAN20 PE=1 SV=3 - [ZSC20_HUMAN]	Rare	0.0454545	0.04791
Q14203	DCTN1	Dynactin subunit 1 OS=Homo sapiens OX=9606 GN=DCTN1 PE=1 SV=3 - [DCTN1_HUMAN]	Rare	0.0454545	0.04765
Q5HY64	FAM47C	Putative protein FAM47C OS=Homo sapiens OX=9606 GN=FAM47C PE=2 SV=1 - [FA47C_HUMAN]	Rare	0.0454545	0.04752
Q9P0K8	FOXJ2	Forkhead box protein J2 OS=Homo sapiens OX=9606 GN=FOXJ2 PE=1 SV=1 - [FOXJ2_HUMAN]	Rare	0.0454545	0.04752
Q9UGR2	ZC3H7B	Zinc finger CCCH domain-containing protein 7B OS=Homo sapiens OX=9606 GN=ZC3H7B PE=1 SV=2 - [Z3H7B_HUMAN]	Rare	0.0454545	0.04752
Q0VG06	FAAP100	Fanconi anemia core complex-associated protein 100 OS=Homo sapiens OX=9606 GN=FAAP100 PE=1 SV=3 - [FP100_HUMAN]	Rare	0.0454545	0.04739
Q9BV73	CEP250	Centrosome-associated protein CEP250 OS=Homo sapiens OX=9606 GN=CEP250 PE=1 SV=2 - [CP250_HUMAN]	Rare	0.0454545	0.04739
Q6UB98	ANKRD12	Ankyrin repeat domain-containing protein 12 OS=Homo sapiens OX=9606 GN=ANKRD12 PE=1 SV=3 - [ANR12_HUMAN]	Rare	0.0454545	0.04733
P41091	EIF2S3	Eukaryotic translation initiation factor 2 subunit 3 OS=Homo sapiens OX=9606 GN=EIF2S3 PE=1 SV=3 - [IF2G_HUMAN]	Rare	0.0454545	0.04726
P42898	MTHFR	Methylenetetrahydrofolate reductase OS=Homo sapiens OX=9606 GN=MTHFR PE=1 SV=3 - [MTHR_HUMAN]	Rare	0.0454545	0.04726
P08069	IGF1R	Insulin-like growth factor 1 receptor OS=Homo sapiens OX=9606 GN=IGF1R PE=1 SV=1 - [IGF1R_HUMAN]	Rare	0.0454545	0.04713
Q2M1Z3	ARHGAP31	Rho GTPase-activating protein 31 OS=Homo sapiens OX=9606 GN=ARHGAP31 PE=1 SV=2 - [RHG31_HUMAN]	Rare	0.0454545	0.047
Q6AZY7	SCARA3	Scavenger receptor class A member 3 OS=Homo sapiens OX=9606 GN=SCARA3 PE=1 SV=1 - [SCAR3_HUMAN]	Rare	0.0454545	0.047
Q9NY43	BARHL2	BarH-like 2 homeobox protein OS=Homo sapiens OX=9606 GN=BARHL2 PE=1 SV=2 - [BARH2_HUMAN]	Rare	0.0454545	0.047
P78412	IRX6	Iroquois-class homeodomain protein IRX-6 OS=Homo sapiens OX=9606 GN=IRX6 PE=1 SV=3 - [IRX6_HUMAN]	Rare	0.0454545	0.04688
Q9Y2J8	PADI2	Protein-arginine deiminase type-2 OS=Homo sapiens OX=9606 GN=PADI2 PE=1 SV=2 - [PADI2_HUMAN]	Rare	0.0454545	0.04688
Q8TDY8	IGDCC4	Immunoglobulin superfamily DCC subclass member 4 OS=Homo sapiens OX=9606 GN=IGDCC4 PE=1 SV=1 - [IGDC4_HUMAN]	Rare	0.0454545	0.04681
P53814	SMTN	Smoothelin OS=Homo sapiens OX=9606 GN=SMTN PE=1 SV=7 - [SMTN_HUMAN]	Rare	0.0454545	0.04675
Q2KHR3	QSER1	Glutamine and serine-rich protein 1 OS=Homo sapiens OX=9606 GN=QSER1 PE=1 SV=3 - [QSER1_HUMAN]	Rare	0.0454545	0.04662
P45954	ACADSB	Short/branched chain specific acyl-CoA dehydrogenase, mitochondrial OS=Homo sapiens OX=9606 GN=ACADSB PE=1 SV=1 - [ACDSB_HUMAN]	Rare	0.0454545	0.04655
Q86UW9	DTX2	Probable E3 ubiquitin-protein ligase DTX2 OS=Homo sapiens OX=9606 GN=DTX2 PE=1 SV=3 - [DTX2_HUMAN]	Rare	0.0454545	0.04649
Q9BYF1	ACE2	Angiotensin-converting enzyme 2 OS=Homo sapiens OX=9606 GN=ACE2 PE=1 SV=2 - [ACE2_HUMAN]	Rare	0.0454545	0.04649
Q8N1K5	THEMIS	Protein THEMIS OS=Homo sapiens OX=9606 GN=THEMIS PE=1 SV=3 - [THMS1_HUMAN]	Rare	0.0454545	0.04642
Q12906	ILF3	Interleukin enhancer-binding factor 3 OS=Homo sapiens OX=9606 GN=ILF3 PE=1 SV=3 - [ILF3_HUMAN]	Rare	0.0454545	0.04629
Q68DX3	FRMPD2	FERM and PDZ domain-containing protein 2 OS=Homo sapiens OX=9606 GN=FRMPD2 PE=1 SV=3 - [FRPD2_HUMAN]	Rare	0.0454545	0.04629
A0A075B6K4	IGLV3-10	Immunoglobulin lambda variable 3-10 OS=Homo sapiens OX=9606 GN=IGLV3-10 PE=3 SV=2 - [LV310_HUMAN]	Rare	0.0454545	0.04623
Q13492	PICALM	Phosphatidylinositol-binding clathrin assembly protein OS=Homo sapiens OX=9606 GN=PICALM PE=1 SV=2 - [PICAL_HUMAN]	Rare	0.0454545	0.04623
Q9UKX3	MYH13	Myosin-13 OS=Homo sapiens OX=9606 GN=MYH13 PE=2 SV=2 - [MYH13_HUMAN]	Rare	0.0454545	0.04623
Q9Y5E8	PCDHB15	Protocadherin beta-15 OS=Homo sapiens OX=9606 GN=PCDHB15 PE=2 SV=1 - [PCDBF_HUMAN]	Rare	0.0454545	0.04623
Q9UGU0	TCF20	Transcription factor 20 OS=Homo sapiens OX=9606 GN=TCF20 PE=1 SV=3 - [TCF20_HUMAN]	Rare	0.0454545	0.0461
Q9NZM3	ITSN2	Intersectin-2 OS=Homo sapiens OX=9606 GN=ITSN2 PE=1 SV=3 - [ITSN2_HUMAN]	Rare	0.0454545	0.04604
O15438	ABCC3	Canalicular multispecific organic anion transporter 2 OS=Homo sapiens OX=9606 GN=ABCC3 PE=1 SV=3 - [MRP3_HUMAN]	Rare	0.0454545	0.04597
O75334	PPFIA2	Liprin-alpha-2 OS=Homo sapiens OX=9606 GN=PPFIA2 PE=1 SV=2 - [LIPA2_HUMAN]	Rare	0.0454545	0.04597
Q6ZR37	PLEKHG7	Pleckstrin homology domain-containing family G member 7 OS=Homo sapiens OX=9606 GN=PLEKHG7 PE=2 SV=1 - [PKHG7_HUMAN]	Rare	0.0454545	0.04591
Q92918	MAP4K1	Mitogen-activated protein kinase kinase kinase kinase 1 OS=Homo sapiens OX=9606 GN=MAP4K1 PE=1 SV=1 - [M4K1_HUMAN]	Rare	0.0454545	0.04591
Q96EB6	SIRT1	NAD-dependent protein deacetylase sirtuin-1 OS=Homo sapiens OX=9606 GN=SIRT1 PE=1 SV=2 - [SIR1_HUMAN]	Rare	0.0454545	0.04591
A4FU01	MTMR11	Myotubularin-related protein 11 OS=Homo sapiens OX=9606 GN=MTMR11 PE=2 SV=2 - [MTMRB_HUMAN]	Rare	0.0454545	0.04584
Q9NUA8	ZBTB40	Zinc finger and BTB domain-containing protein 40 OS=Homo sapiens OX=9606 GN=ZBTB40 PE=1 SV=4 - [ZBT40_HUMAN]	Rare	0.0454545	0.04584
O75643	SNRNP200	U5 small nuclear ribonucleoprotein 200 kDa helicase OS=Homo sapiens OX=9606 GN=SNRNP200 PE=1 SV=2 - [U520_HUMAN]	Rare	0.0454545	0.04571
Q6R327	RICTOR	Rapamycin-insensitive companion of mTOR OS=Homo sapiens OX=9606 GN=RICTOR PE=1 SV=1 - [RICTR_HUMAN]	Rare	0.0454545	0.04552
Q8N9M1	C19orf47	Uncharacterized protein C19orf47 OS=Homo sapiens OX=9606 GN=C19orf47 PE=1 SV=1 - [CS047_HUMAN]	Rare	0.0454545	0.04552
Q9C0H5	ARHGAP39	Rho GTPase-activating protein 39 OS=Homo sapiens OX=9606 GN=ARHGAP39 PE=1 SV=2 - [RHG39_HUMAN]	Rare	0.0454545	0.04552
Q9Y493	ZAN	Zonadhesin OS=Homo sapiens OX=9606 GN=ZAN PE=2 SV=5 - [ZAN_HUMAN]	Rare	0.0454545	0.04552
O94813	SLIT2	Slit homolog 2 protein OS=Homo sapiens OX=9606 GN=SLIT2 PE=1 SV=1 - [SLIT2_HUMAN]	Rare	0.0454545	0.04545
Q5JWR5	DOP1A	Protein dopey-1 OS=Homo sapiens OX=9606 GN=DOP1A PE=2 SV=1 - [DOP1_HUMAN]	Rare	0.0454545	0.04545
Q8IWG1	DNAI3	Dynein intermediate chain 3, axonemal OS=Homo sapiens OX=9606 GN=DNAI3 PE=1 SV=1 - [DNAI3_HUMAN]	Rare	0.0454545	0.04545
Q9HBL8	NMRAL1	NmrA-like family domain-containing protein 1 OS=Homo sapiens OX=9606 GN=NMRAL1 PE=1 SV=1 - [NMRL1_HUMAN]	Rare	0.0454545	0.04545
P50222	MEOX2	Homeobox protein MOX-2 OS=Homo sapiens OX=9606 GN=MEOX2 PE=1 SV=2 - [MEOX2_HUMAN]	Rare	0.0454545	0.0452
Q9UMZ3	PTPRQ	Phosphatidylinositol phosphatase PTPRQ OS=Homo sapiens OX=9606 GN=PTPRQ PE=1 SV=2 - [PTPRQ_HUMAN]	Rare	0.0454545	0.0452
P57052	RBM11	Splicing regulator RBM11 OS=Homo sapiens OX=9606 GN=RBM11 PE=1 SV=1 - [RBM11_HUMAN]	Rare	0.0454545	0.045
P27708	CAD	CAD protein OS=Homo sapiens OX=9606 GN=CAD PE=1 SV=3 - [PYR1_HUMAN]	Rare	0.0454545	0.04494
Q8NDL9	AGBL5	Cytosolic carboxypeptidase-like protein 5 OS=Homo sapiens OX=9606 GN=AGBL5 PE=1 SV=1 - [CBPC5_HUMAN]	Rare	0.0454545	0.04494
Q9UMN6	KMT2B	Histone-lysine N-methyltransferase 2B OS=Homo sapiens OX=9606 GN=KMT2B PE=1 SV=1 - [KMT2B_HUMAN]	Rare	0.0454545	0.04494
P42685	FRK	Tyrosine-protein kinase FRK OS=Homo sapiens OX=9606 GN=FRK PE=1 SV=1 - [FRK_HUMAN]	Rare	0.0454545	0.04487
Q7Z478	DHX29	ATP-dependent RNA helicase DHX29 OS=Homo sapiens OX=9606 GN=DHX29 PE=1 SV=2 - [DHX29_HUMAN]	Rare	0.0454545	0.04487
Q8N5N7	MRPL50	39S ribosomal protein L50, mitochondrial OS=Homo sapiens OX=9606 GN=MRPL50 PE=1 SV=2 - [RM50_HUMAN]	Rare	0.0454545	0.04487
Q01484	ANK2	Ankyrin-2 OS=Homo sapiens OX=9606 GN=ANK2 PE=1 SV=4 - [ANK2_HUMAN]	Rare	0.0454545	0.04481
Q60I27	ALS2CL	ALS2 C-terminal-like protein OS=Homo sapiens OX=9606 GN=ALS2CL PE=1 SV=1 - [AL2CL_HUMAN]	Rare	0.0454545	0.04481
Q9NVH1	DNAJC11	DnaJ homolog subfamily C member 11 OS=Homo sapiens OX=9606 GN=DNAJC11 PE=1 SV=2 - [DJC11_HUMAN]	Rare	0.0454545	0.04468
P51159	RAB27A	Ras-related protein Rab-27A OS=Homo sapiens OX=9606 GN=RAB27A PE=1 SV=3 - [RB27A_HUMAN]	Rare	0.0454545	0.04455
Q9BW19	KIFC1	Kinesin-like protein KIFC1 OS=Homo sapiens OX=9606 GN=KIFC1 PE=1 SV=2 - [KIFC1_HUMAN]	Rare	0.0454545	0.04449
Q12980	NPRL3	GATOR complex protein NPRL3 OS=Homo sapiens OX=9606 GN=NPRL3 PE=1 SV=1 - [NPRL3_HUMAN]	Rare	0.0454545	0.04442
Q8TBZ8	ZNF564	Zinc finger protein 564 OS=Homo sapiens OX=9606 GN=ZNF564 PE=1 SV=1 - [ZN564_HUMAN]	Rare	0.0454545	0.04429
Q96ME1	FBXL18	F-box/LRR-repeat protein 18 OS=Homo sapiens OX=9606 GN=FBXL18 PE=1 SV=2 - [FXL18_HUMAN]	Rare	0.0454545	0.04429
Q5VZK9	CARMIL1	F-actin-uncapping protein LRRC16A OS=Homo sapiens OX=9606 GN=CARMIL1 PE=1 SV=1 - [CARL1_HUMAN]	Rare	0.0454545	0.04416
Q8IWT3	CUL9	Cullin-9 OS=Homo sapiens OX=9606 GN=CUL9 PE=1 SV=2 - [CUL9_HUMAN]	Rare	0.0454545	0.04416
Q9NQA5	TRPV5	Transient receptor potential cation channel subfamily V member 5 OS=Homo sapiens OX=9606 GN=TRPV5 PE=1 SV=2 - [TRPV5_HUMAN]	Rare	0.0454545	0.04416
Q86YV9	HPS6	Hermansky-Pudlak syndrome 6 protein OS=Homo sapiens OX=9606 GN=HPS6 PE=1 SV=1 - [HPS6_HUMAN]	Rare	0.0454545	0.0441
Q15067	ACOX1	Peroxisomal acyl-coenzyme A oxidase 1 OS=Homo sapiens OX=9606 GN=ACOX1 PE=1 SV=3 - [ACOX1_HUMAN]	Rare	0.0454545	0.04403
Q86TI0	TBC1D1	TBC1 domain family member 1 OS=Homo sapiens OX=9606 GN=TBC1D1 PE=1 SV=2 - [TBCD1_HUMAN]	Rare	0.0454545	0.0439
Q9HCD6	TANC2	Protein TANC2 OS=Homo sapiens OX=9606 GN=TANC2 PE=1 SV=3 - [TANC2_HUMAN]	Rare	0.0454545	0.0439
[truncated: 264 more rows]
